# Supplementary material
Source: PubMed Central journal article supplement (PMC4348782)
Supplement: supp_pp.114.255430_255430supplementarydata.pdf [file supp_pp.114.255430_255430supplementarydata.pdf]

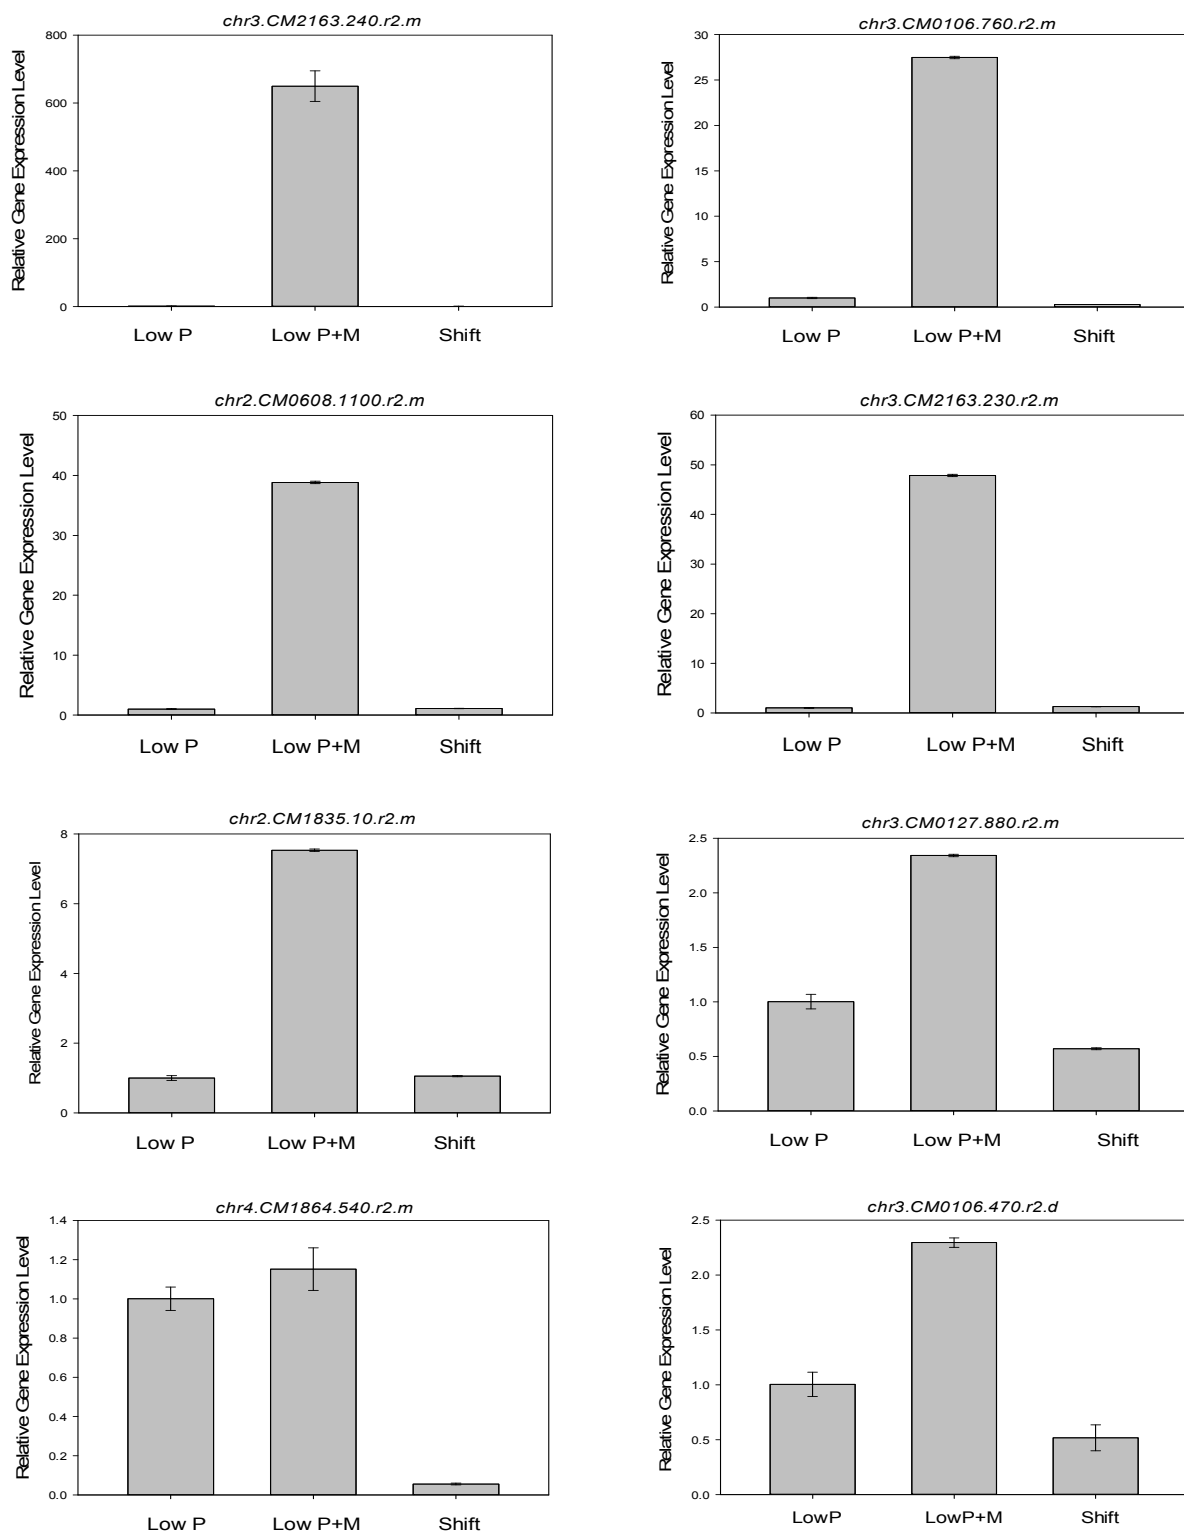

**Supplemental Fig. S1.** AM-inducible transcription factor genes repressed by high Pi condition. Gifu-129 plants grown at low Pi (5  $\mu$ M) conditions were used as controls. After inoculation with *R. irregularis*, plants were grown at low Pi conditions for 8 weeks or 6 weeks at low Pi and re-supplied for two weeks with high Pi (7.5mM). Roots of four plants in one pot were harvested as one sample. Three technical replicates were used to calculate SD.

**A**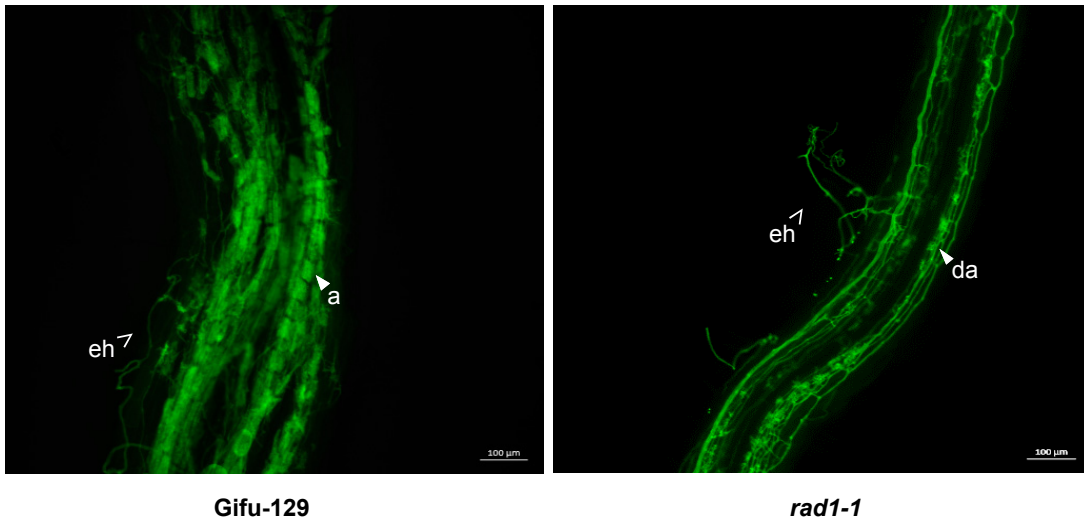**B**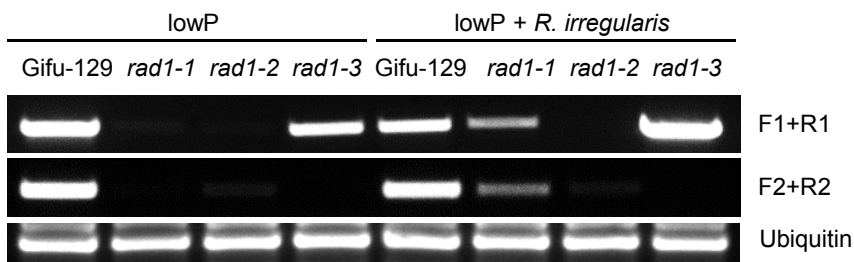

**Supplemental Fig. S2.** Mycorrhiza morphology in *rad1-1* and *RADI* transcript analysis in *rad1 LORE1a* insertion lines.

(A) Arbuscules in Gifu-129 and *rad1-1* in the presence of *R. irregularis* at 8wpi. eh, external hypha. a, arbuscule. da, degenerated arbuscule. Scale bars are 100  $\mu$ m.

(B) *RADI* transcripts were detected in Gifu-129, *rad1-1*, *rad1-2* and *rad1-3* in the presence or absence of *R. irregularis* at 6wpi. 32 cycles were performed. Representative results from one out of three independent experiments are shown.

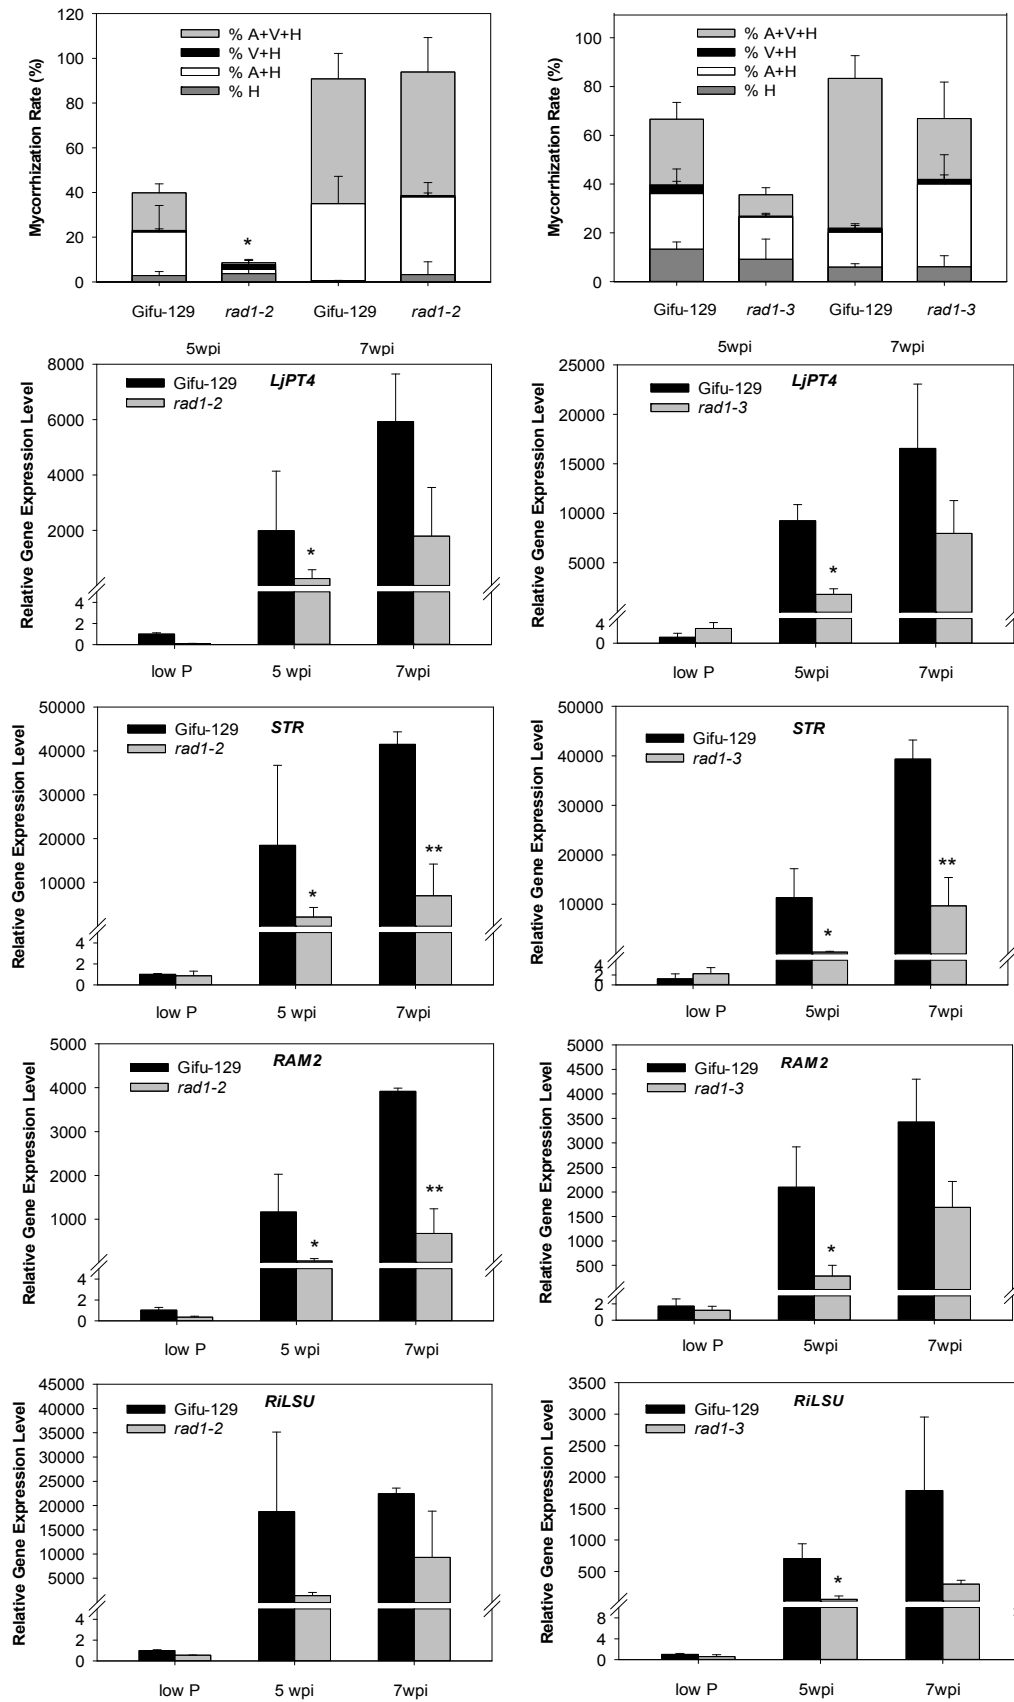

**Supplemental Fig. S3.** Mycorrhization rate and AM-inducible marker gene expression in *rad1-2* and *rad1-3* at 5 and 7 wpi. Three biological replicates were utilized. Error bars represent SD. Student's t-test was used to calculate confidence level. \* indicates  $P < 0.05$ . \*\* indicates  $P < 0.01$ . Similar results was obtained from another independent experiment.

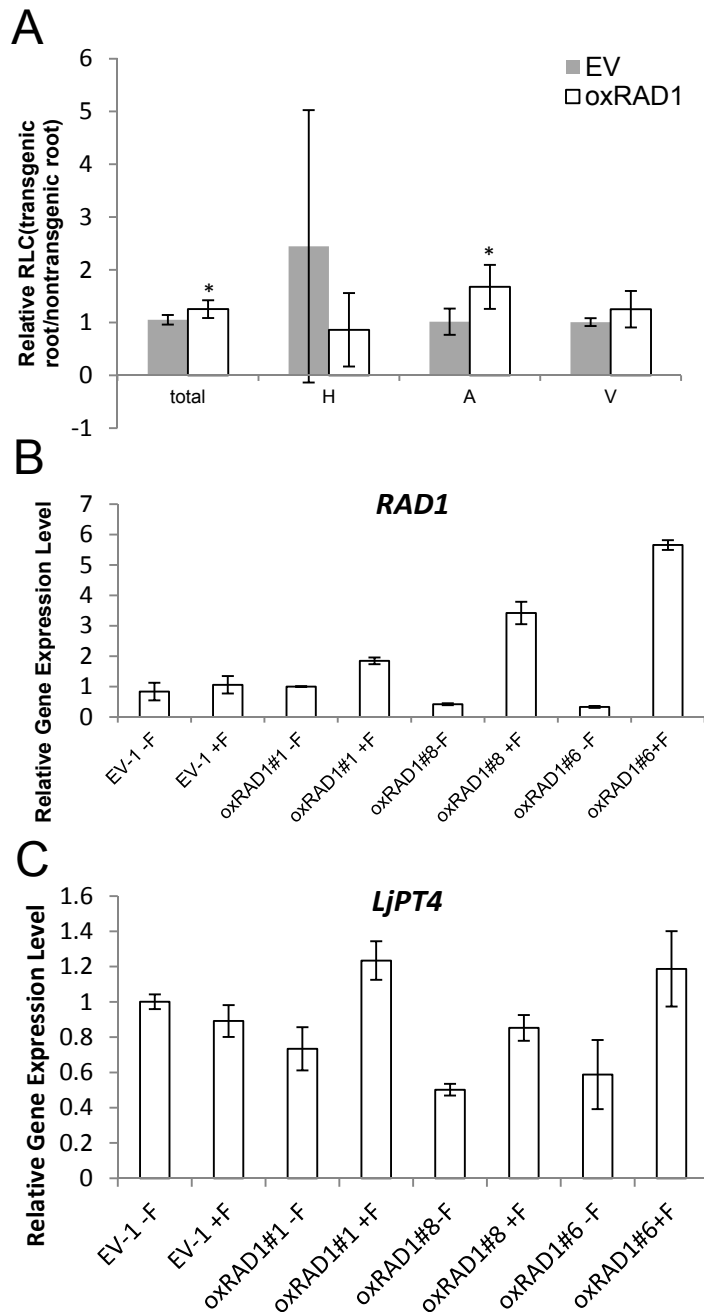

**Supplemental Fig. S4.** Mycorrhizal structures and *RAD1* gene expression in transgenic hairy roots overexpressing chimeric *35Spro:RAD1*.

**(A)** Relative root length colonized (RLC) in wild type hairy roots transformed with the empty vector (EV) or with a construct containing *35Spro:RAD1* (oxRAD1). Percentage of RLC from transgenic hairy roots with EV ( $n=3$ ) or oxRAD1 ( $n=8$ ), respectively, was quantified. Relative RLC was calculated comparing the RLC from the transgenic red fluorescent hairy roots with the RLC from non-transgenic roots on the same composite plants. Significant differences of means between EV and oxRAD1 were determined by Student's *t*-test (\* indicates  $P<0.05$ ).

**(B)** *RAD1* gene expression is shown in transgenic red fluorescent hairy roots (+F) and non-transgenic non-fluorescent roots (-F) from three composite oxRAD1 plants and one control plant with EV in presence of *R. irregularis*. Error bars are from technical replicates.

**(C)** *LjPT4* gene expression in transgenic fluorescent hairy roots (+F) and non-transgenic roots (-F) from three composite oxRAD1 plants and one control plant with EV in presence of *R. irregularis*. Error bars are from technical replicates.

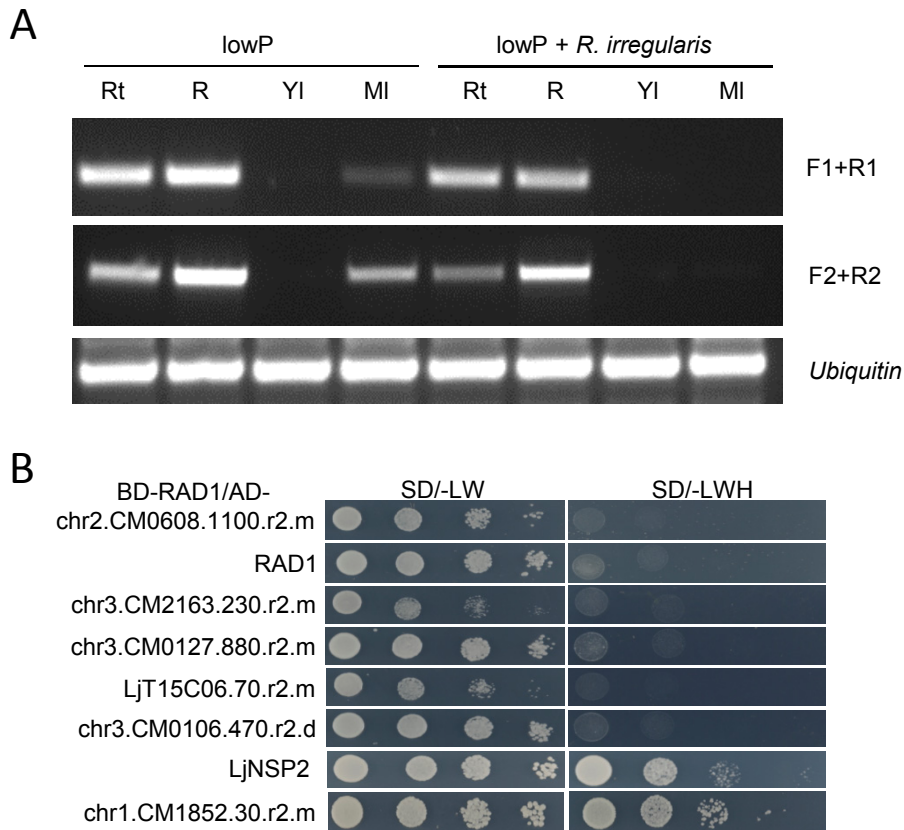

**Supplemental Fig. S5. *RAD1* gene expression profile in mycorrhizal and non-mycorrhizal *Lotus* and GRAS proteins that interact with *RAD1*.**

**(A)** RT-PCR analysis of *RAD1* transcript levels in different tissues of wild type in the presence or absence of *R. irregularis*. Rt, root tip; R, root; Yl, young leaves; MI, mature leaves. For *Ubiquitin* transcript amplification 28 PCR cycles, for *RAD1* 32 PCR cycles were used.

**(B)** Y2H analysis of interaction of *RAD1* with mycorrhiza-regulated GRAS proteins. *RAD1* was fused to the GAL4 DNA binding domain (BD). An AP2 transcription factor (chr2.CM0608.1100.r2.m) fused to the GAL4 activation domain (AD) was used as negative control. SD/-LW and SD/-LWH indicate a synthetic dropout medium lacking Leu and Trp and lacking Leu, Trp, and His, respectively.

A

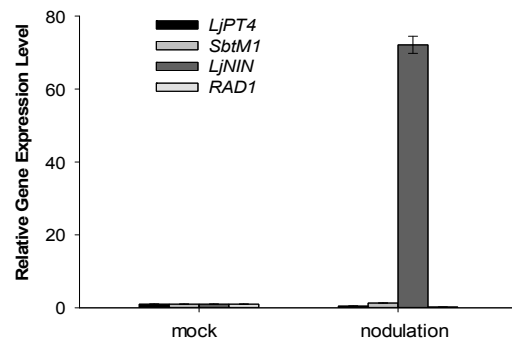

B

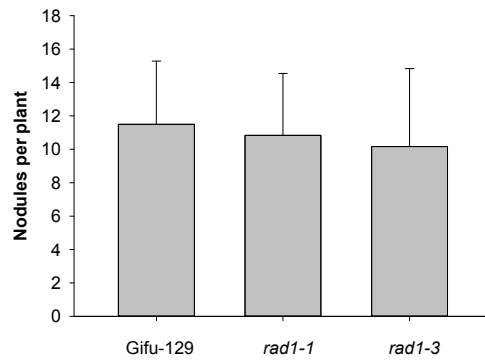

**Supplemental Fig. S6.** *RAD1* gene expression in nodulated roots and nodulation in *rad1-1* and *rad1-3*.  
(A) Relative expression levels of *LjPT4*, *SbtM1*, *LjNIN* and *RAD1* genes detected by qRT-PCR in nodulated plant roots.  
(B) The number of nodules per plant in *rad1-1*, *rad1-3* and Gifu-129 is given (n=6). Two experiments were performed independently with similar results. Error bars represent SD.

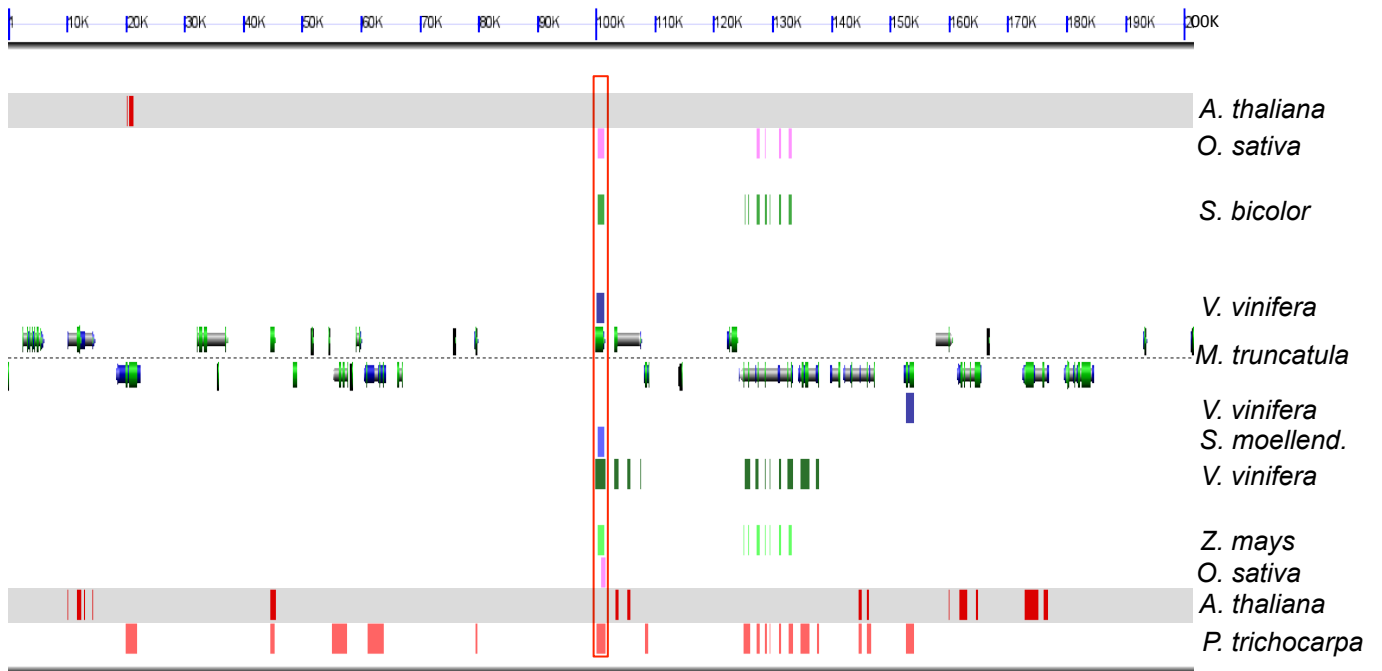

**Supplemental Fig. S7.** Synteny analysis of *RAD1* on AM host species and non-host *Arabidopsis thaliana*. Synteny analysis of a ~200 kb region encompassing the *RAD1* locus in *M. truncatula*. Green and blue boxes above and below the dashed lines represent *Medicago* genes. Orthologous genes in other species are indicated above and below: *Arabidopsis thaliana* (red), *Populus trichocarpa* (orange), *Vitis vinifera* (dark blue – RAD1-like; dark-green RAD1), *Sorghum bicolor* (green), *Oryza sativa* (pink), *Zea mays* (light green) and *Selaginella moellendorffii* (violet). The *RAD1* locus is red-boxed.

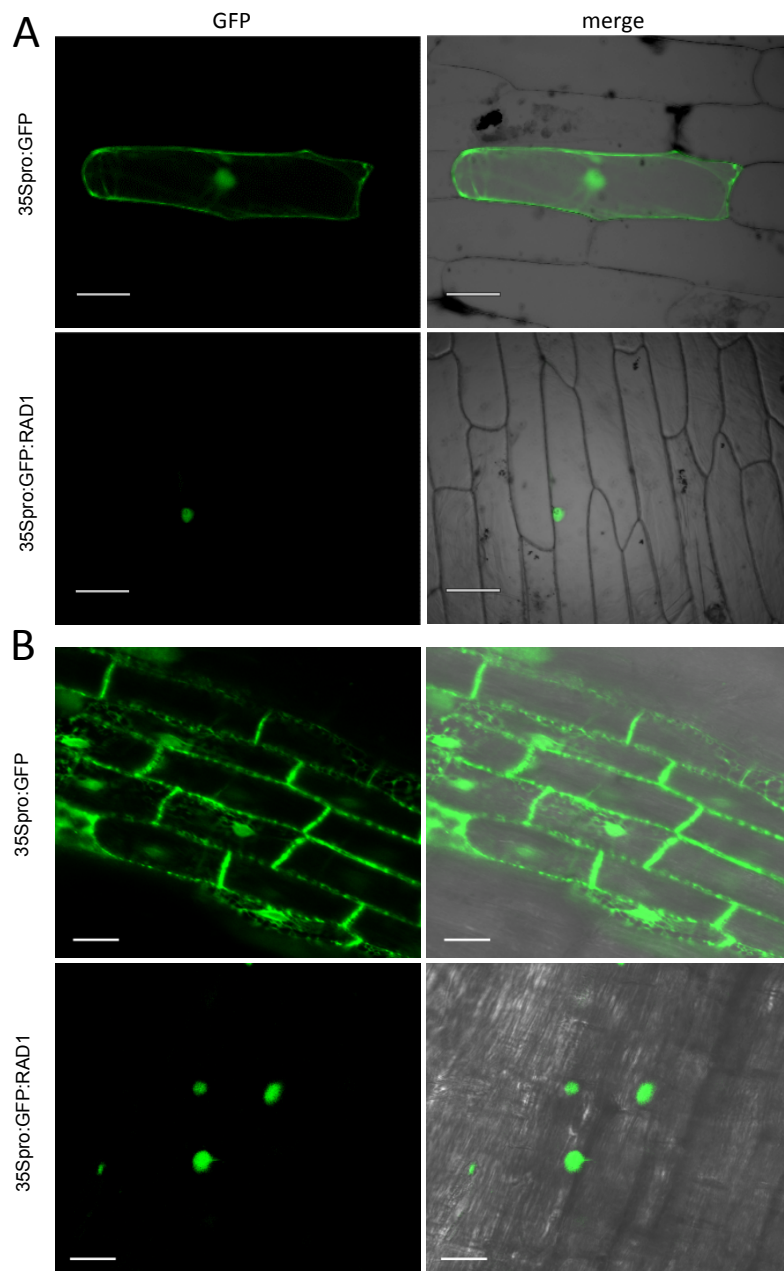

**Supplemental Fig. S8.** Nuclear localization of RAD1.

**(A)** Nuclear localization of RAD1 in onion epidermal cells after biolistic bombardment with *35Spro::GFP* or *35Spro::GFP::RAD1*, respectively. Images with green fluorescence (GFP) alone and merged with bright-field image (merge) are shown as indicated. Scale bar is 100  $\mu\text{m}$ .

**(B)** Nuclear localization of RAD1 in *Lotus* hairy roots expressing *35Spro::GFP* or *35Spro::GFP::RAD1*, respectively. Scale bar is 20  $\mu\text{m}$ .



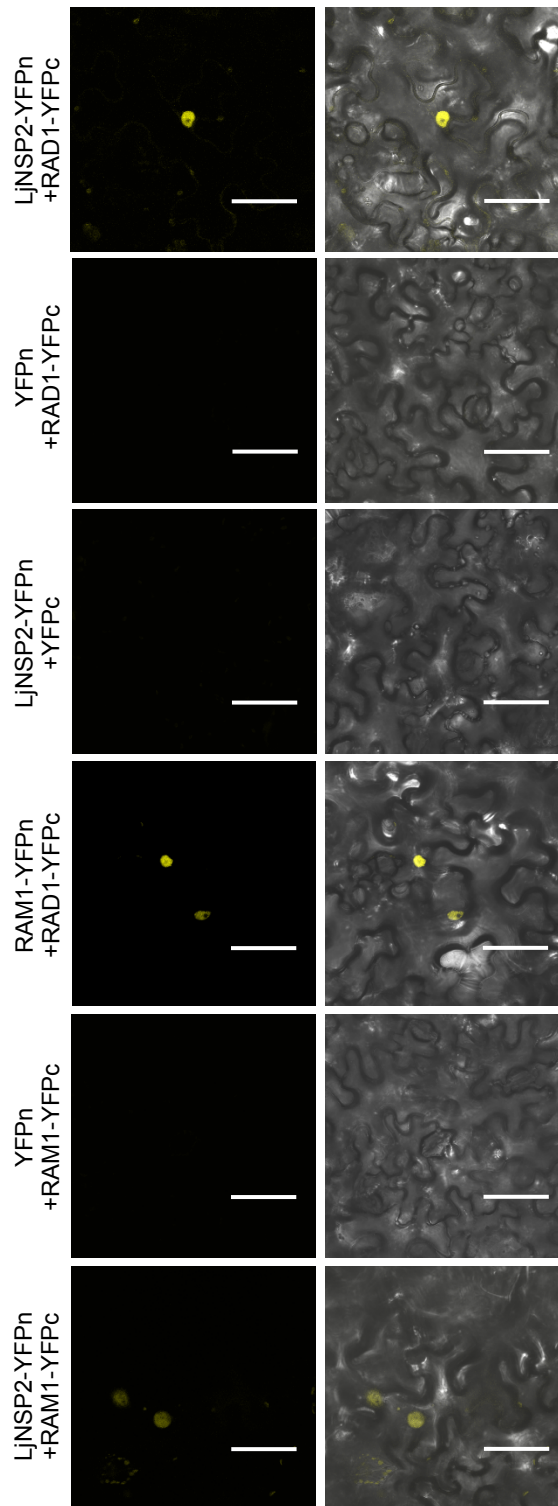

**Supplemental Fig. S9.** Interaction between RAM1, RAD1 and LjNSP2 by BiFC assay in *N. benthamiana*. Leaves were infiltrated with mixtures of *A. tumefaciens* strain GV3101 to coexpress RAD1 and RAM1 or LjNSP2 fused to half of split YFP, respectively as indicated at left. Three days after infiltration, images were captured from five different leaves for each plasmid combination. Scale bars are 50  $\mu$ m.

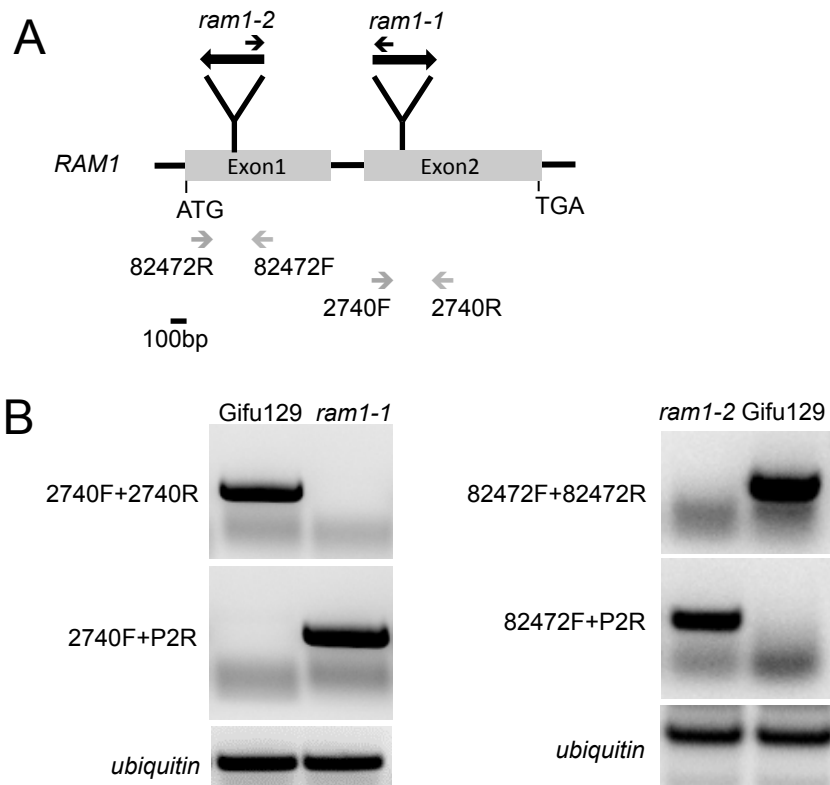

**Supplemental Fig. S10.** Gene structure of *RAM1* in wild type *Lotus* and *ram1* mutant.

**(A)** Gene structure of *RAM1* in *Lotus* and the positions of the *LORE1a* insertions in *ram1-1* and *ram1-2*. Gray arrows indicate the primers matching with the genome sequence used for genotyping. Black arrows indicate P2R primer on the left border of the *LORE1a* transposon.

**(B)** Identification of homozygous *ram1-1* and *ram1-2* through genomic DNA amplification. Primer pairs as described in (A) were used for PCR and are indicated at left. *Ubiquitin* gene was used as a control.

**Supplemental Table S1:** List of mycorrhiza up-regulated transcription factors generated by DESeq.

| Seq. Name<br>( <i>Lotus</i> CDSv2.5) | Putative<br>annotation<br>of<br>transcription<br>factor | RNA-seq data                                         |              |          |          |
|--------------------------------------|---------------------------------------------------------|------------------------------------------------------|--------------|----------|----------|
|                                      |                                                         | fold<br>change<br>(+ <i>R.i.</i><br>/- <i>R.i.</i> ) | <i>P</i> adj | resVarA  | resVarB  |
| chr6.CM0679.550.r2.d                 | MADS-box                                                | M<br>specific                                        | 7.0e-04      | 6.09     | 0.00     |
| chr6.CM1613.300.r2.m                 | C2H2 Zinc<br>finger                                     | M<br>specific                                        | 5.1e-03      | 0.24     | 0.00     |
| chr1.LjB18K24.70.r2.a                | MYB                                                     | M<br>specific                                        | 1.42e-102    | 17.63    | 0.00     |
| chr3.CM0111.130.r2.d                 | NAC                                                     | M<br>specific                                        | 5.10e-17     | 0.82     | 0.00     |
| chr3.CM2163.240.r2.m                 | GRAS                                                    | 970.83                                               | 6.73e-89     | 8.54     | 5.1e-04  |
| chr2.CM0608.1100.r2.m                | AP2                                                     | 586.44                                               | 1.18e-06     | 12.14    | 1.3e-03  |
| chr3.CM2163.230.r2.m                 | GRAS                                                    | 462.42                                               | 3.11e-111    | 12.07    | 8.84e-06 |
| chr1.CM1852.30.r2.m                  | GRAS                                                    | 438.56                                               | 8.73e-109    | 2.33     | 9.84e-06 |
| chr5.CM0239.240.r2.m                 | GRAS                                                    | 170.03                                               | 1.89e-40     | 0.64     | 0.01     |
| chr2.CM0021.530.r2.m                 | C2H2 Zinc<br>finger                                     | 165.30                                               | 5.66e-65     | 0.18     | 6.40e-05 |
| chr4.CM0075.50.r2.m                  | ERF                                                     | 164.31                                               | 3.43e-23     | 4.27e-04 | 0.01     |
| chr2.CM0081.1990.r2.m                | AP2                                                     | 150.70                                               | 5.7e-69      | 10.70    | 3.88e-04 |
| chr1.LjB18K24.100.r2.a               | MYB                                                     | 120.88                                               | 1.56e-80     | 15.0     | 2.46e-03 |
| chr6.CM0041.30.r2.a                  | AP2                                                     | 78.55                                                | 4.72e-62     | 0.08     | 1.72e-04 |
| LjB17L21.50.r2.d                     | MADS-box                                                | 44.10                                                | 7.51e-07     | 2.13e-03 | 0.09     |
| chr1.CM0029.1590.r2.a                | ARF                                                     | 43.89                                                | 5.02e-48     | 0.1      | 8.24e-04 |
| chr1.CM1413.480.r2.d                 | WRKY                                                    | 38.12                                                | 5.42e-26     | 0.49     | 0.08     |
| LjSGA_032180.1                       | C2H2 Zinc<br>finger                                     | 24.65                                                | 2.11e-30     | 0.76     | 0.02     |
| chr5.CM1667.220.r2.a                 | GRAS                                                    | 19.68                                                | 6.69e-15     | 0.63     | 0.28     |
| LjSGA_122341.1                       | GRAS                                                    | 13.04                                                | 9.07e-19     | 1.46     | 0.14     |
| chr6.CM0139.1440.r2.d                | GRAS                                                    | 11.74                                                | 4.35e-35     | 0.74     | 4.56e-05 |
| chr2.CM1835.10.r2.m                  | NAC                                                     | 8.96                                                 | 3.65e-09     | 1.05     | 1.5e-03  |
| LjSGA_020219.1                       | GRAS                                                    | 8.93                                                 | 5.03e-03     | 0.60     | 0.10     |
| LjSGA_012098.1                       | AP2                                                     | 6.80                                                 | 3.26e-09     | 0.04     | 0.25     |
| chr4.CM0680.320.r2.m                 | GRAS                                                    | 6.02                                                 | 9.55e-17     | 11.47    | 0.10     |
| LjSGA_029723.1                       | AP2                                                     | 6.00                                                 | 8.98e-14     | 1.73     | 0.10     |
| chr1.CM0012.840.r2.m                 | NAC                                                     | 6.04                                                 | 2.71e-23     | 4.12     | 0.70     |
| chr3.CM0127.880.r2.m                 | GRAS                                                    | 5.77                                                 | 6.12e-13     | 6.14     | 0.01     |

|                        |                     |      |          |          |          |
|------------------------|---------------------|------|----------|----------|----------|
| LjSGA_045015.1         | GRAS                | 5.74 | 2.84e-22 | 4.13     | 3.60e-03 |
| LjSGA_073109.1         | GRAS                | 5.34 | 1.93e-22 | 5.29     | 0.15     |
| LjSGA_026563.1         | MYB                 | 5.31 | 4.30e-03 | 0.95     | 0.01     |
| chr6.CM0118.1050.r2.a. | ERF                 | 4.98 | 6.92e-19 | 0.29     | 0.13     |
| chr1.cm0122.2130.r2.d  | GRAS                | 4.81 | 2.83e-13 | 1.06     | 0.22     |
| chr3.CM0106.470.r2.d   | GRAS                | 3.57 | 1.50e-13 | 2.51     | 0.12     |
| chr1.CM0375.530.r2.a   | C2H2 Zinc<br>finger | 3.54 | 9.86e-12 | 1.44e-03 | 1.05e-03 |
| chr2.CM0018.140.r2.m   | GRAS                | 3.20 | 8.07e-10 | 0.01     | 0.71     |
| LjSGA_055804.0.1       | C2H2<br>Zinc finger | 3.17 | 9.21e-04 | 0.01     | 0.07     |
| chr3.CM0106.760.r2.m   | NIN-like            | 3.13 | 7.69e-08 | 1.24     | 1.93     |
| chr4.CM1864.540.r2.m   | GRAS                | 2.93 | 2.01e-10 | 40.77    | 1.24     |
| LjT15C06.70.r2.m       | GRAS                | 2.51 | 4.23e-04 | 11.13    | 1.06e-03 |
| chr5.CM0200.2670.r2.d  | LOB domain          | 2.46 | 6.97e-06 | 0.21     | 0.06     |
| chr1.CM0284.80.r2.d    | AP2-ERF             | 2.31 | 1.60e-03 | 1.21     | 2.98e-03 |
| chr6.CM0314.840.r2.d   | bZIP                | 2.30 | 3.35e-03 | 0.46     | 2.86e-03 |
| chr3.CM0176.150.r2.m   | NAC                 | 2.27 | 3.43e-03 | 0.40     | 5.15e-05 |
| chr3.CM0460.10.r2.d    | GRAS                | 2.11 | 2.85e-04 | 1.50     | 0.19     |

"resVar" values indicate the degree of the variance among the biological samples. If resVarA or resVarB are <15, the fold changes are robust. "M specific" indicates mycorrhiza specific induction of gene expression.

**Supplemental Table S2:** Forty-five mycorrhiza up-regulated transcription factors under different treatments.

| <b>Overall highly expressed genes</b> |             |            |             |             |             |
|---------------------------------------|-------------|------------|-------------|-------------|-------------|
| Gene ID                               | Low P+M     | High P+M   | shift       | Low P       | High P      |
| chr1.CM0375.530.r2.a                  | 292.749139  | 65.0446598 | 61.1996559  | 82.7275152  | 63.6899635  |
| chr3.CM0176.150.r2.m                  | 91.522928   | 38.2383685 | 53.9730872  | 40.394509   | 26.0924937  |
| chr1.CM0012.840.r2.m                  | 349.15635   | 32.9624048 | 39.6685867  | 57.8409834  | 34.5023455  |
| chr5.CM0200.2670.r2.d                 | 231.955327  | 107.937444 | 170.9069145 | 94.3299251  | 179.063813  |
| chr3.CM0460.10.r2.d                   | 244.052245  | 42.2776687 | 73.5944351  | 115.4822037 | 79.2501851  |
| chr2.CM0018.140.r2.m                  | 255.58247   | 48.2073169 | 51.6239006  | 79.9909595  | 56.886244   |
| chr3.CM0106.470.r2.d                  | 491.400977  | 70.7606984 | 115.6729524 | 137.4609898 | 97.676021   |
| chr1.CM0122.2130.r2.d                 | 165.672537  | 30.088316  | 31.2386641  | 34.408076   | 25.3193636  |
| chr6.CM0139.1440.r2.d                 | 319.955846  | 31.5771559 | 33.8243808  | 27.2527556  | 26.925496   |
| chr6.CM0314.840.r2.d                  | 83.713264   | 51.1785688 | 48.5987186  | 36.375022   | 52.2947531  |
| chr3.CM0106.760.r2.m                  | 183.9800069 | 65.5690423 | 74.88890491 | 58.78141048 | 62.03393774 |

| <b>Genes which were only responsive to AM under low P conditions</b> |             |            |            |             |            |
|----------------------------------------------------------------------|-------------|------------|------------|-------------|------------|
| Gene ID                                                              | Low P+M     | High P+M   | shift      | Low P       | High P     |
| chr2.CM0021.530.r2.m                                                 | 301.577336  | 0.3172006  | 3.7890705  | 1.8244533   | 1.2694607  |
| LjSGA_032180.1                                                       | 144.082462  | 6.8876778  | 9.0619715  | 5.8439403   | 7.6067857  |
| chr1.CM1413.480.r2.d                                                 | 99.969242   | 6.2532766  | 4.9788498  | 2.6226361   | 9.6793125  |
| chr2.CM1835.10.r2.m                                                  | 44.693256   | 8.3700899  | 15.0244424 | 4.9887356   | 5.4743866  |
| chr3.CM0111.130.r2.d                                                 | 43.419953   | 0.5308103  | 0          | 0           | 0          |
| LjSGA_026563.1                                                       | 16.807706   | 6.9976965  | 2.8933424  | 3.1642823   | 7.1603485  |
| chr1.LjB18K24.100.r2.a                                               | 485.867106  | 3.812835   | 5.8745779  | 4.019487    | 2.9554226  |
| chr1.LjB18K24.70.r2.a                                                | 601.412944  | 0          | 2.5113982  | 0           | 0.4264798  |
| LjB17L21.50.r2.d                                                     | 18.859199   | 0          | 0.4258908  | 0.4276024   | 0.4264798  |
| chr6.CM0679.550.r2.d                                                 | 8.276469    | 0.3172006  | 0.8517816  | 0           | 0          |
| chr3.CM0127.880.r2.m                                                 | 117.540714  | 12.0600506 | 19.4895084 | 20.3825447  | 12.1882979 |
| chr5.CM1667.220.r2.a                                                 | 56.110791   | 1.4824121  | 1.2337258  | 2.8507238   | 1.2694607  |
| chr5.CM0239.240.r2.m                                                 | 145.41238   | 2.226832   | 0.8517816  | 0.8552047   | 0          |
| chr1.CM1852.30.r2.m                                                  | 800.135821  | 1.7996127  | 2.5113982  | 1.8244533   | 1.2694607  |
| chr3.CM2163.230.r2.m                                                 | 843.667924  | 1.1652115  | 0.8517816  | 1.8244533   | 0.4165011  |
| chr3.CM2163.240.r2.m                                                 | 470.488665  | 0.3172006  | 3.3631797  | 0.4846243   | 1.259482   |
| chr1.CM0029.1590.r2.a                                                | 240.24622   | 5.5152845  | 5.4047406  | 5.4733599   | 4.6513631  |
| LjSGA_029723.1                                                       | 123.780115  | 11.8592965 | 14.5985516 | 20.6106325  | 10.0958136 |
| LjSGA_012098.1                                                       | 56.634212   | 4.7644368  | 5.0227963  | 8.3240837   | 6.7737834  |
| chr6.CM0041.30.r2.a                                                  | 320.224498  | 2.7512145  | 3.3192332  | 4.0765089   | 6.3173675  |
| chr2.CM0081.1990.r2.m                                                | 339.365693  | 3.5992253  | 4.6408521  | 2.2520557   | 2.9554226  |
| chr2.CM0608.1100.r2.m                                                | 284.202937  | 0          | 0          | 0.4846243   | 0          |
| chr4.CM0075.50.r2.m                                                  | 70.258661   | 0          | 0          | 0.4276024   | 0.4264798  |
| <b>Low Pi induced genes regardless of AM status</b>                  |             |            |            |             |            |
| Gene ID                                                              | Low P+M     | High P+M   | shift      | Low P       | High P     |
| LjT15C06.70.r2.m                                                     | 103.902922  | 2.9712519  | 5.1106894  | 41.3637576  | 6.3173675  |
| chr4.CM1864.540.r2.m                                                 | 1502.546805 | 18.216164  | 41.9738268 | 513.4417307 | 32.7066181 |
| LjSGA_073109.1                                                       | 475.682844  | 23.3235125 | 25.1443536 | 88.3434921  | 16.8496397 |
| LjSGA_045015.1                                                       | 380.155738  | 14.3125937 | 10.0016461 | 66.2504137  | 14.2807822 |
| chr4.CM0680.320.r2.m                                                 | 176.496151  | 5.295247   | 0.807835   | 29.3052966  | 3.3719237  |
| LjSGA_020219.1                                                       | 376.56175   | 5.6124476  | 13.3208793 | 42.1905135  | 8.4198305  |
| LjSGA_122341.1                                                       | 96.630563   | 0          | 0          | 7.411857    | 0.4264798  |
| chr1.CM0284.80.r2.d                                                  | 103.803575  | 7.1012875  | 6.9764641  | 45.0126642  | 4.2248833  |
| chr6.CM0118.1050.r2.a                                                | 343.723987  | 19.4006588 | 24.5123047 | 69.0726886  | 23.563551  |
| <b>Intermediates</b>                                                 |             |            |            |             |            |
| Gene ID                                                              | Low P+M     | High P+M   | shift      | Low P       | High P     |
| chr6.CM1613.300.r2.m                                                 | 6.53636     | 1.6960217  | 0.4258908  | 0           | 0          |
| LjSGA_055804.0.1                                                     | 44.863102   | 16.0993508 | 16.0823821 | 14.168024   | 15.1736565 |

Normalized counts per transcript from different treatments are shown above.

**Supplemental Table S3:** Sequences of oligonucleotide primer pairs used.

Primers for RT-PCR:

| <b>Gene ID</b>                                        | <b>primer name and primer sequence</b>      |
|-------------------------------------------------------|---------------------------------------------|
| <i>LjNIN</i>                                          | qLjNIN-F: TGGATCAGCTAGCATGGAAT              |
|                                                       | qLjNIN-R: TCTGCTTCTGCTGTTGTCAC              |
| <i>SbtM1</i>                                          | qSbtM1-F:<br>TGTATGCTGCTGCTGAAAAAACAAC      |
|                                                       | qSbtM1-R:<br>CTTCTTGACCTTTTGCAATAAATGGGATTC |
| <i>STR</i>                                            | qSTR-F: CTGGACAAGATCACCGTCCT                |
|                                                       | qSTR-R: GTGGCCATCAAGCTGGTATT                |
| <i>RADI</i>                                           | q-F1: CCGAGGCTCATGCCTAGGTCCACT              |
|                                                       | q-R1: CCCCAATGGGTTTCCATGCCTATCC             |
|                                                       | q-F2: ATGGTGGAGCAGGATTCAAG                  |
|                                                       | q-R2: TTAACATTTCCAGCAAGAAG                  |
| <i>RAM1</i>                                           | qRAM1-F: GGAGGTTTCTTGAGGCACTG               |
|                                                       | qRAM1-R: CCTTCCATGATCTTCTCTCCA              |
| <i>RAM2</i>                                           | qRAM2-F: GGGATGGACCCGTTTACTT                |
|                                                       | qRAM2-R: GACTTTGTTTGCGGCCTTAG               |
| <i>LjPT4</i>                                          | qLjPT4-F: TCCAAGCGGAGCAAGACAAG              |
|                                                       | qLjPT4-R: TTCTGTGTGAGGTTCTGGCTGTAG          |
| <i>Ubiquitin</i>                                      | qUbiquitin-F: TTCACCTTGTGCTCCGTCTTC         |
|                                                       | qUbiquitin-R:<br>AACAAACAGCACACACAGACAATCC  |
| <i>R.irregularis</i><br>large subunit rRNA<br>(RiLSU) | LR1 : GCATATCAATAAGCGGAGGA                  |
|                                                       | 8.22: AACTCCTCACGCTCCACAGA                  |
| chr3.CM0106.760.r2.m                                  | q30-F: AGGATGCTGCAAAGAGCATT                 |
|                                                       | q30-R: CTCCCTGGACAGAGTCAAGC                 |
| chr3.CM0127.880.r2.m                                  | q21-F: GAAGCCATGGGACAAGAAA                  |
|                                                       | q21-R: TCCAAAGTGCTCACAACAGC                 |

|                       |                             |
|-----------------------|-----------------------------|
| chr2.CM0608.1100.r2.m | q3-F: AGAGGAGTAGCAAGGCACCA  |
|                       | q3-R: TGGGGTTTGCTCTTGAGAAG  |
| chr3.CM2163.230.r2.m  | q-8-F: TGCCTGTGAAGACAGGTGAA |
|                       | q-8-R: GCCACTCAGCAAAGTCCTC  |
| chr3.CM2163.240.r2.m  | q-5-F: TCTTCACCCAAGTGGAAGG  |
|                       | q-5-R: CCAGCATGATTCTCTCCACA |
| chr2.CM1835.10.r2.m   | q17F: GCAACTGATTCTTGGGCAAT  |
|                       | q17R: GAATGGCTGATGGTGTGTG   |
| chr3.CM0106.470.r2.d  | q26-F: TCCTCACTTGAAACTCACTG |
|                       | q26-R: CATTGTTGACCAACCTCCT  |

Primers for genotyping:

| <b>LORE1a mutant</b> | <b>primer name and primer sequence</b> |
|----------------------|----------------------------------------|
| <i>rad1-1</i>        | 1039F: GGAATGCTATTCACTCACACTC          |
|                      | 1039R: GAACGAGGAACTCAACACATC           |
| <i>rad1-2</i>        | 576F: CCGAGGCTCATGCCTAGGTCCACT         |
|                      | 576R: CCCCAATGGGTTTCCATGCCTATCC        |
| <i>rad1-3</i>        | 2260F: AGTCGTGGCGCTTTGAATTCGGTG        |
|                      | 2260R: TGAGTGGTTTCGAATCACCAGAGCG       |
| <i>ram1-1</i>        | 2740F: GCTTGTGCTGAAGCAGTGGCCAAA        |
|                      | 2740R: TGC GGAGGGAGTGTGCTAATTCGG       |
| <i>ram1-2</i>        | 82472F: TCAATTGCTGGCAGGGCAAGGTTT       |
|                      | 82472R: TGCAGTCCAAGAAAATGCCACTCA       |
| Ubiquitin            | GS-UB-F:CGTGAAGGCTAAGATCCAGGATAAG      |
|                      | GS-UB-R:CGATACTACTTGTTC AAGAGGGGC      |
|                      | P2R: CCATGGCGGTTCCGTGAATCTTAGG         |

Note: Endogenous fragment: F+R, LORE1a insertion fragment: F+P2R

Primers for Y2H:

| <b>plasmids</b>        | <b>primer name and primer sequence</b>                                   |
|------------------------|--------------------------------------------------------------------------|
| pAS-RAD1/<br>pACT-RAD1 | RAD1-attB1:<br>GGGGACAAGTTTGTACAAAAAAGCAGGCTCTATGTCC<br>CCTCCTCTTTATAGTG |
|                        | RAD1-attB2:<br>GGGGACCACTTTGTACAAGAAAGCTGGGTCTTAACAT<br>TTCCAGCAAGAAGCTG |
| pACT-RAM1              | RAM1-attB1:<br>GGGGACAAGTTTGTACAAAAAAGCAGGCTCTATGATC<br>AATTC AATGTGTGG  |
|                        | RAM1-attB2:<br>GGGGACCACTTTGTACAAGAAAGCTGGGTCTCAGCAT<br>CTCCATGCAGAGG    |
| pACT-AP2               | AP2-attB1:                                                               |

|                                   |                                                                                          |
|-----------------------------------|------------------------------------------------------------------------------------------|
|                                   | GGGGACAAGTTTGTACAAAAAAGCAGGCTCTATGGAG<br>TTTGCTTCTGTAAAATC                               |
|                                   | AP2-attB2:<br>GGGGACCACTTTGTACAAGAAAGCTGGGTCTCATTCC<br>ATAGGGGGAAACATG                   |
| pACT-<br>Chr3.CM2163.2<br>30.r2.m | Chr3.CM2163.230.r2.m-attB1:<br>GGGGACAAGTTTGTACAAAAAAGCAGGCTCTATGAGG<br>GAGCTGAGATATGAC  |
|                                   | Chr3.CM2163.230.r2.m-attB2:<br>GGGGACCACTTTGTACAAGAAAGCTGGGTCTCATTTC<br>CTGAAACTCCATGCTG |
| pACT-<br>Chr3.CM0127.8<br>80.r2   | Chr3.CM0127.880.r2.m-attB1:<br>GGGGACAAGTTTGTACAAAAAAGCAGGCTCTATGGAA<br>GACAAGGGCTTAAAAC |
|                                   | Chr3.CM0127.880.r2.m-attB2:<br>GGGGACCACTTTGTACAAGAAAGCTGGGTCTTAAAAC<br>TTCCAGGCTGATATAG |
| pACT-cGRAS                        | Chr3.CM0106.470.r2.d-attB1:<br>GGGGACAAGTTTGTACAAAAAAGCAGGCTCTATGGAC<br>ATTACTCCTTATAC   |
|                                   | Chr3.CM0106.470.r2.d-attB2:<br>GGGGACCACTTTGTACAAGAAAGCTGGGTCTCAAGTA<br>GCTAGCTGGGGCT    |
| pACT-<br>LjT15C06.70.r2.<br>m     | LjT15C06.70.r2.m-attB1:<br>GGGGACAAGTTTGTACAAAAAAGCAGGCTCTATGGAC<br>ATGGAGATTGACATTG     |
|                                   | LjT15C06.70.r2.m-attB2:<br>GGGGACCACTTTGTACAAGAAAGCTGGGTCTTACAAA<br>TTAGAGTCATCTG        |
| pACT-LjNSP2                       | LjNSP2-attB1:<br>GGGGACAAGTTTGTACAAAAAAGCAGGCTCTATGGAA<br>ATGGATATAGATTG                 |
|                                   | LjNSP2-attB2:<br>GGGGACCACTTTGTACAAGAAAGCTGGGTCTTACAAA<br>CAATCTGATTCTG                  |
| pAS- RAD1ΔN                       | RAD1-121-attB1:<br>GGGGACAAGTTTGTACAAAAAAGCAGGCTCTatgGTTG<br>GAGCTGAAGAAGATG             |
|                                   | RAD1-attB2:<br>GGGGACCACTTTGTACAAGAAAGCTGGGTCTTAACAT<br>TTCCAGCAAGAAGCTG                 |
| pAS- RAD1ΔPS                      | RAD1-attB1:<br>GGGGACAAGTTTGTACAAAAAAGCAGGCTCTATGTCC<br>CCTCCTCTTTATAGTG                 |



|                  |                                                                             |
|------------------|-----------------------------------------------------------------------------|
|                  | RAD1-340-attB2:<br>GGGGACCACTTTGTACAAGAAAGCTGGGTCTCAAAGA<br>GCTTCATCATCATTC |
| pAS- RAD1 ΔS     | RAD1-attB1:<br>GGGGACAAGTTTGTACAAAAAAGCAGGCTCTATGTCC<br>CCTCCTCTTTATAGTG    |
|                  | RAD1-420-attB2:<br>GGGGACCACTTTGTACAAGAAAGCTGGGTCTTACATC<br>TTTGCCCTCTTAGTG |
| pAS- RAD1<br>ΔNL | RAD1-200-attB1:<br>GGGGACAAGTTTGTACAAAAAAGCAGGCTCTatgTCCA<br>TGATGAACATCATG |
|                  | RAD1-attB2:<br>GGGGACCACTTTGTACAAGAAAGCTGGGTCTTAACAT<br>TTCCAGCAAGAAGCTG    |

Primers for BiFC:

|                                       |                                                                                  |
|---------------------------------------|----------------------------------------------------------------------------------|
| pBatTL-RAD1-YFPn/<br>pBatTL-RAD1-YFPc | RAD1-attB1:<br>GGGGACAAGTTTGTACAAAAAAGCAGGCTCTAT<br>GTCCCCTCCTCTTTATAGTG         |
|                                       | RAD1withoutTGA-attB2:<br>GGGGACCACTTTGTACAAGAAAGCTGGGTcCacatttc<br>cagcaagaagctg |
| pBatTL-RAM1-YFPn/<br>pBatTL-RAM1-YFPc | RAM1-attB1:<br>GGGGACAAGTTTGTACAAAAAAGCAGGCTCTAT<br>GATCAATTCAATGTGTGG           |
|                                       | RAM1withoutTGA-attB2:<br>GGGGACCACTTTGTACAAGAAAGCTGGGTcCGCA<br>TCTCCATGCAGAGG    |
| pBatTL-LjNSP2-YFPn                    | LjNSP2-attB1:<br>GGGGACAAGTTTGTACAAAAAAGCAGGCTCTAT<br>GGAAATGGATATAGATTG         |
|                                       | LjNSP2withoutTGA-attB2:<br>GGGGACCACTTTGTACAAGAAAGCTGGGTCTGC<br>ACAATCTGATTCTG   |

### Supplemental Text S1. Synteny analysis of potential symbiotic transcription factors.

A ~200kb sized region in the *Medicago truncatula* genome containing transcription factors identified by RNAseq was compared to the syntenic region in *Arabidopsis thaliana* (col-0, pink) and *Populus trichocarpa* (green) using CoGe:GEvo (<https://genomeevolution.org/CoGe/GEvo.pl>) as described in Delaux et al. 2014. *Medicago* was used as a proxy for *Lotus* given that this tool is not available for *Lotus*. The target gene in *Medicago* is red-boxed together with orthologs from *Populus* and *Arabidopsis* when present. The vertical orange stripes are regions that contain unknown nucleotides that were inserted during the scaffolding of assembled contigs. However, the position and relative size of the gap (orange stripe) is known due to the size of the genomic library and/or a genomic map.

#### Examples of genes conserved in host and non-host species

chr2.CM0021.530.r2.m

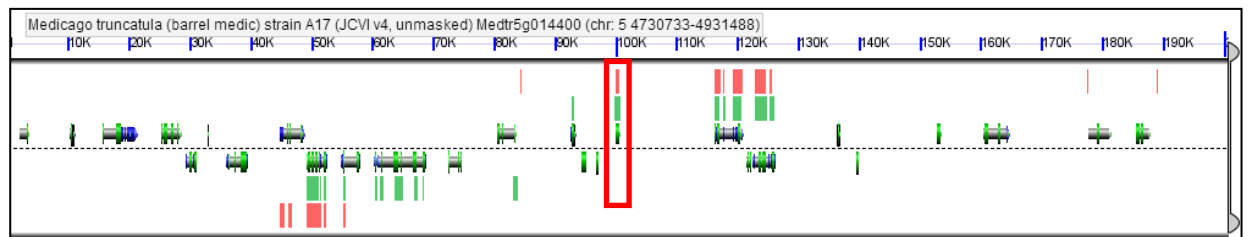

Strong syntenic support for both *Arabidopsis* and *Populus*.

chr3.CM0106.760.r2.m

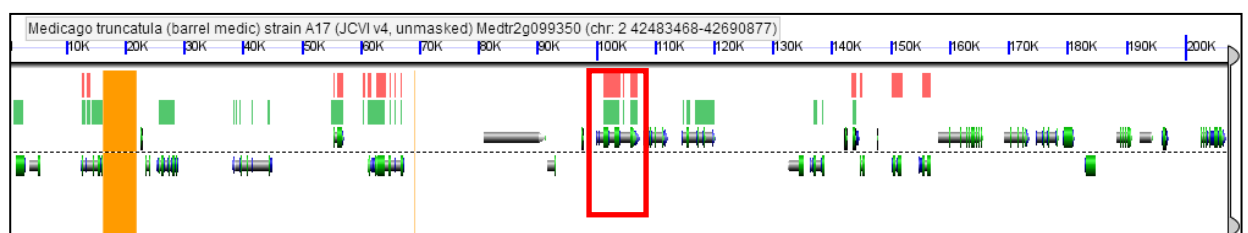

Strong syntenic support for both *Arabidopsis* and *Populus*.

chr3.CM0460.10.r2.d

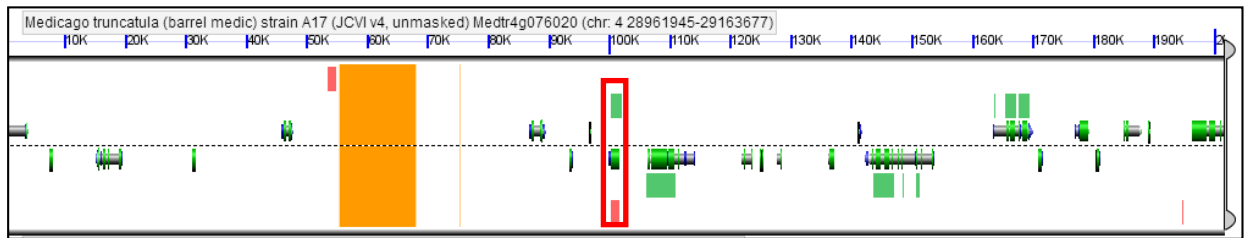

Strong syntenic support for *Populus* but low support for *Arabidopsis*.

## Genes missing in in non-host species

*Present in Lupinus (potential common symbioses transcription factors)*

LjSGA\_045015.1

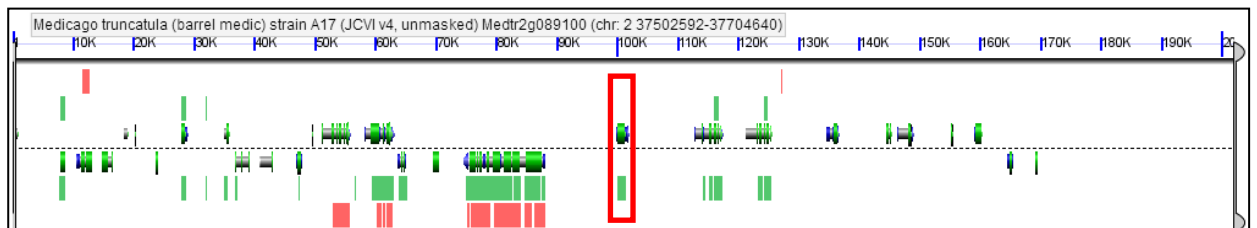

chr5.CM1667.220.r2.a

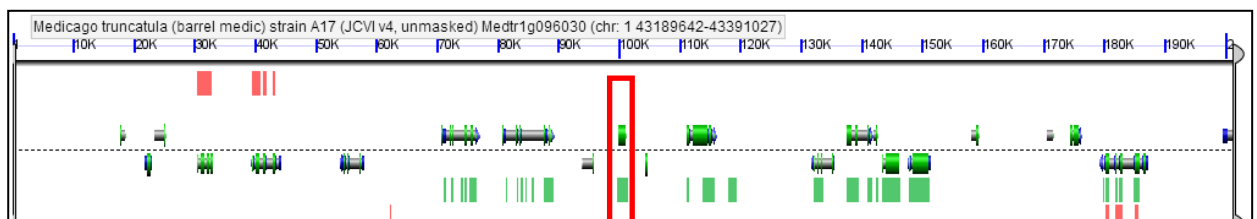

chr3.CM0106.470.r2.d

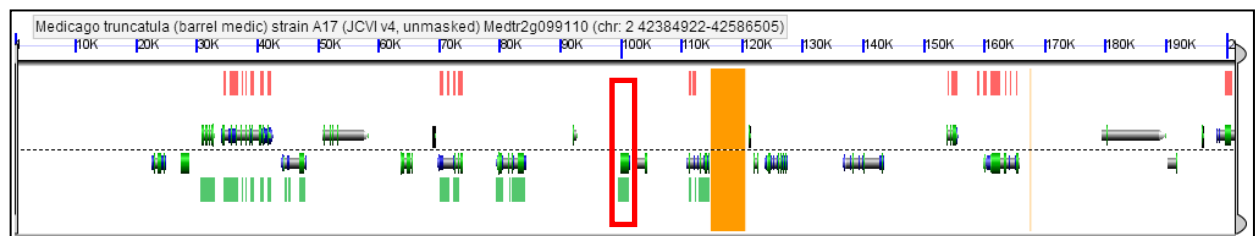

chr4.CM0075.50.r2.m

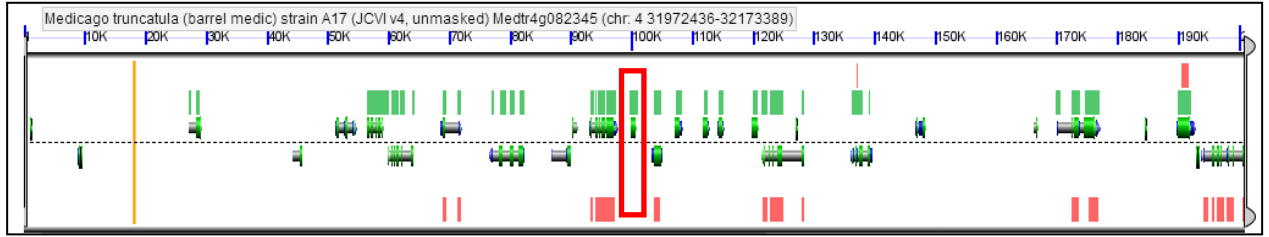

LjSGA\_122341.1

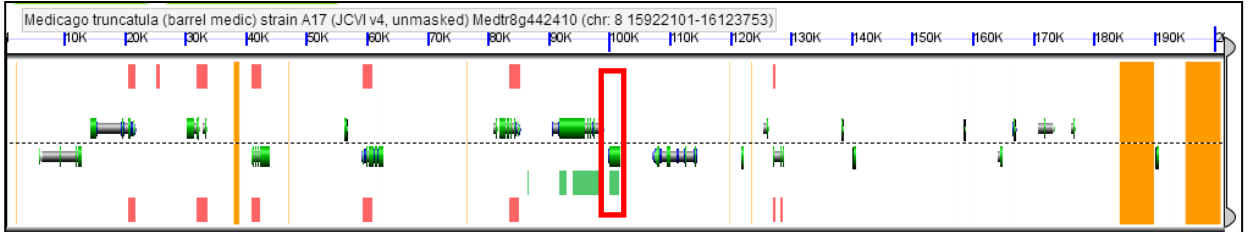

***Absent in Lupinus (potential AMS specific transcription factors)***

chr1.CM0012.840.r2.m

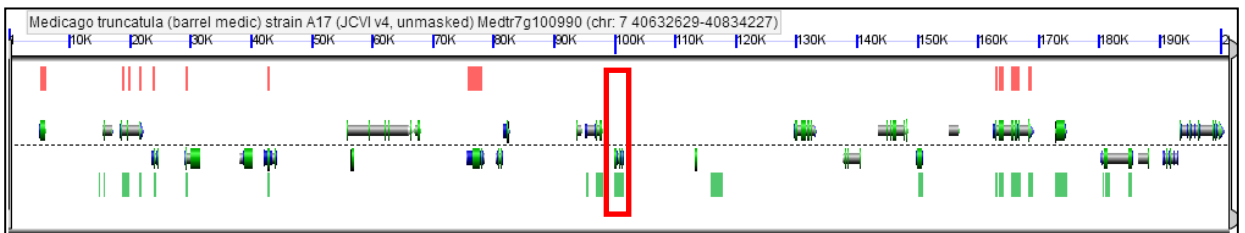

chr1.CM0284.80.r2.d

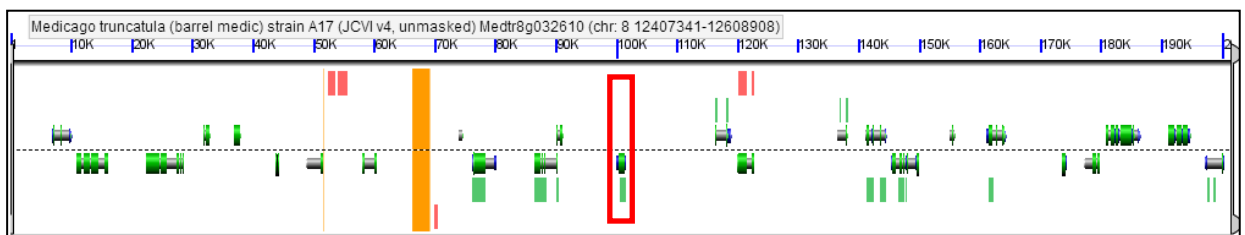

chr1.CM1852.30.r2.m

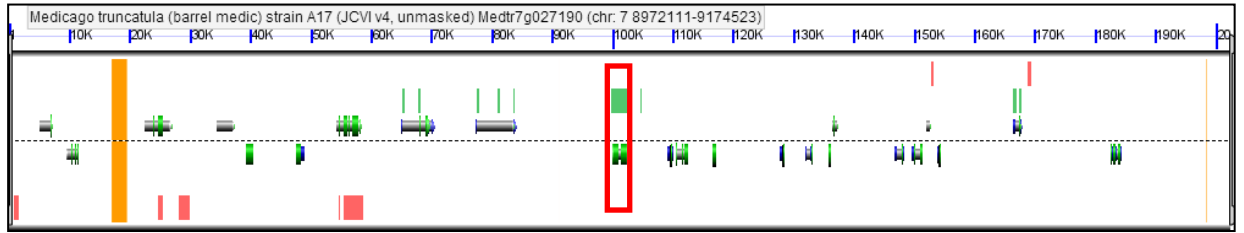

chr1.CM0029.1590.r2.a

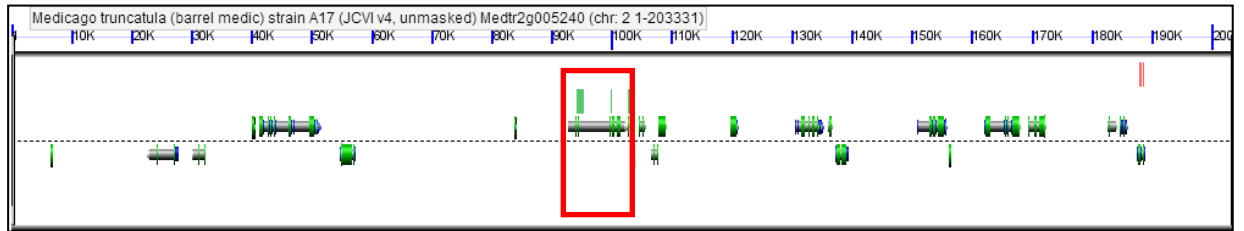

Low syntenic support even for *Populus*.

chr2.CM0608.1100.r2.m

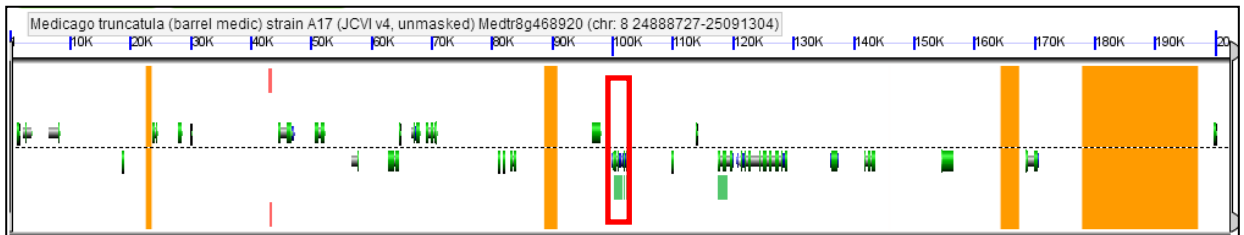

chr6.CM0118.1050.r2.a

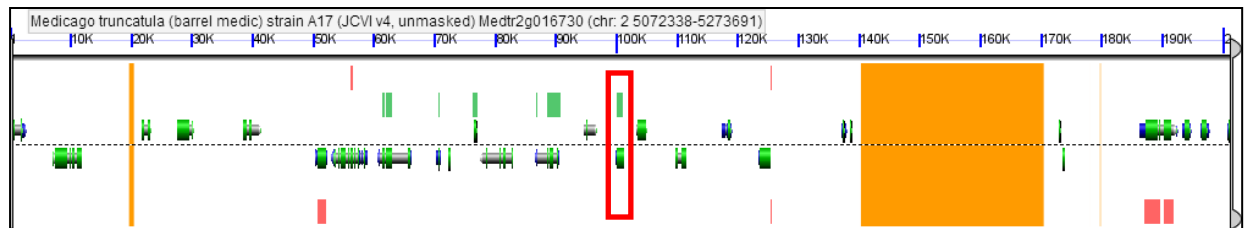

chr4.CM1864.540.r2.m

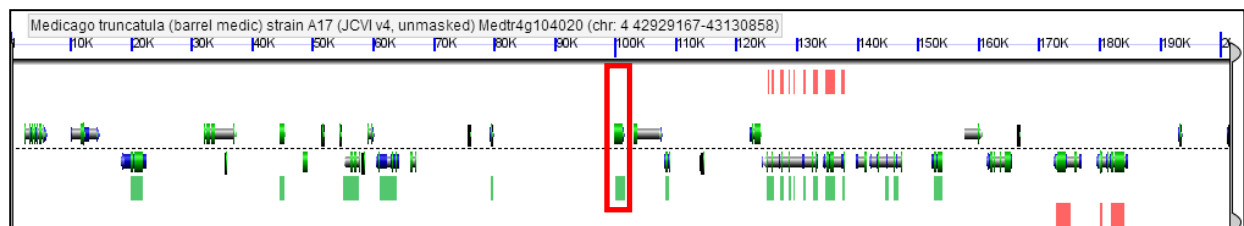

chr5.CM0239.240.r2.m

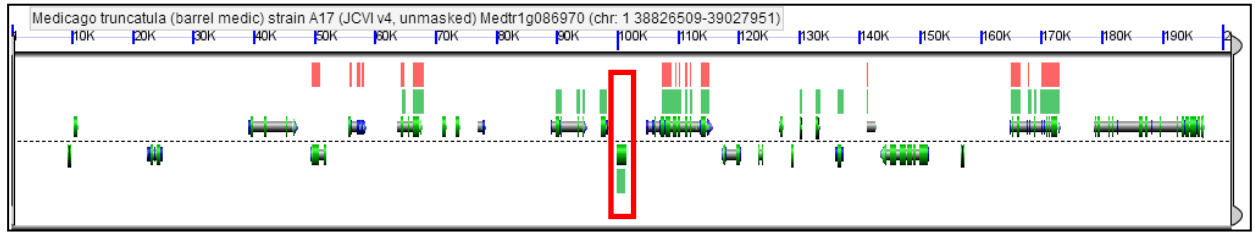

chr4.CM0680.320.r2.m

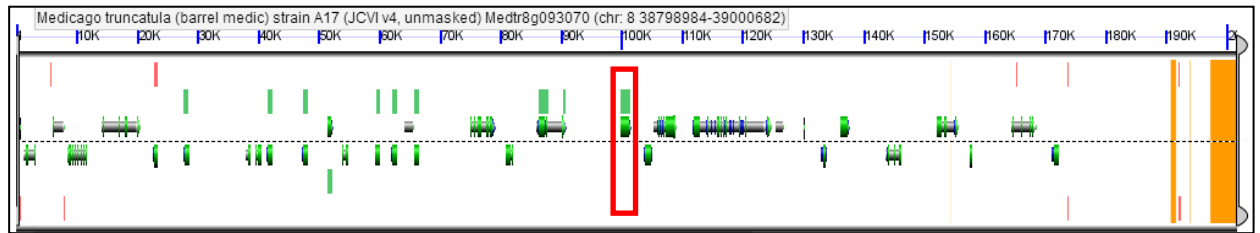

LjSGA\_020219.1

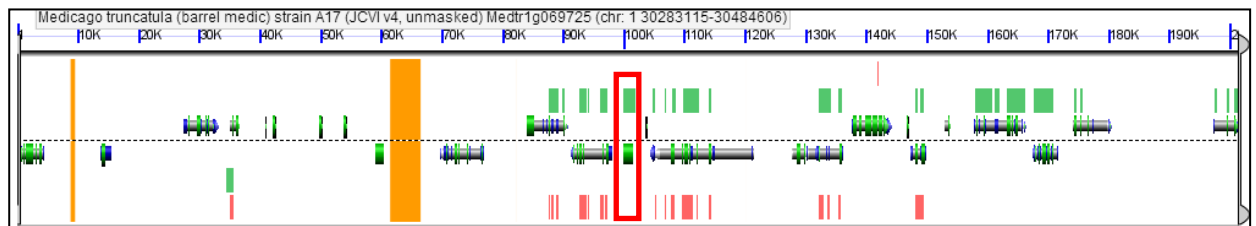

**Supplemental Text S2:** Sequences used for phylogenetic tree.

*Aquilegia coerulea*

>Aco Aquca\_123\_00013

MISDTFHDEKIEGVRGLDLSLSAMAFYPPYLSTLENSVSTWFLPSTDDTRNH  
 KRLKPTLSSDELIGSNNSPYSGGSNNSLFSGGSCITRANSTNSLNSLPKLQFRD  
 HIWYTYQRFLAAEAVEEAAAAMIGEDGERVDEGSGDGMRLVQLLVSCAEAV  
 ACRDRSHASTLLSELRANALVFGTSFQRVASCFVQGLADRLALVQPLGAVGV  
 VAPTMNFMACSSEKKEEALRLVYDVCPHIQFGHFVANTSILEAFEGESLVHV  
 VDLGMTMGLPHGHQWRRLIHS LANRAGQPPRRLRITGVGNSGDQLQTIGDEL  
 EAYAQSLGINFDILQLHCVVKESRGALNSVLQIIHELSPKVLVLVEQDSSHNGP  
 FFLGRFMEALHYYS AIFDSL DAMPLKYDTRAKIEQFYFAEEIKNIVSCEGPA

RVERHERVDQWRRRMSRAGFQPVPIKMLAQAKQWLKGKVKVCDGYTIVEEK  
GCLVLGWKSKPLVAASCWKC

*Arabidopsis thaliana*

>AtSCL1

MVEQTVVREHIKARVMSLVRSAEPSSYRNPKLYTLNENGNNGVSSAQIFDP  
DRSKNPCLTDDSYPSQSYEKYFLDSPTDEFVQHPIGSGASVSSFGSLDSFPYQS  
RPVLGCSMEFQLPLDSTSTSSTRLLGDYQAVSYSPSMDVVEEFDDEQMRSKIQ  
ELERALLGDEDDKMVGIDNLMEIDSEWSYQNESEQHQDSPKESSADSNSHV  
SSKEVVSQATPKQILISCARALSEGKLEEALSMVNELRQIVSIQGDPSQRIAA  
MVEGLAARMAASGKFIYRALKCKEPPSDERLAAMQVLFVPCPCFKFGFLAA  
NGAILEAIKGEEVHIIDFDINQGNQYMTLIRSIAELPGKRPRRLRTGIDDPESV  
QRSIGGLRIIGLRLEQLAEDNGVSFKFKAMPSKTSIVSPSTLGCKPGETLIVNFA  
FQLHHMPDESVTTVNQRDPELLHMVKS LNPCLVTVVEQDVNTNTSPFFPRFIE  
AYEYYS AVFESLDMTLPRESQERMNVERQCLARDIVNIVACEGEERIEREYEA  
AGKWRARMMMAGFNPKPMSAKVTNNIQNLIKQQYCNKYKLKEEMGELHFC  
WEEKSLIVASAWR

>AtGAI

MKRDHHHHHHQDKKTMMMNEEDDGNGMDELLAVLGKVRSSSEMADVAQ  
KLEQLEVMMSNVQEDDLSQLATETVHYNPAELYTWLDSMLTDLNPPSSNAE  
YDLKAIPGDAILNQFAIDSASSNQGGGGDTYTTNKRLKCSNGVVETTTATAE  
STRHVVLVDSQENGVRLVHALLACAEAVQKENLTVAEALVKQIGFLAVSQIG  
AMRKVATYFAEALARRIYRLSPSQSPIDHSLSDTLQMHFYETCPYLKFAHFTA  
NQAILEAFQGGKRVHVIDFSMSQGLQWPALMQALALRPGGPPVFRLTGIGPP  
APDNFDYLHEVGCKLAHLAEAIHVEFEYRGFVANTLADLDASMLELRPSEIES  
VAVNSVFELHKLLGRPGAIKVLGVVNQIKPEIFTVVEQESNHNSPIFLDRFTE  
SLHYSTLFDSDLGVPSPGQDKVMSEVYLGKQICNVVACDGPDRVERHETLSQ  
WRNRFGSAGFAAAHIGSNAFKQASMLLALFNGGEGYRVEESDGCLMLGWH  
TRPLIATSAWKLSTN

>AtSCL3

MVAMFQEDNGTSSVASSPLQVFSTMSLNRPTLLASSSPFHCLKDLKPEERGLY  
LIHLLLT CANHVASGSLQNANAALQLSHLASPDGDTMQRIAAYFTEALANRI  
LKS WPGLYKALNATQTRTNNVSEEIHVRRLFFEMFPILKVSYLLTNRAILEAM  
EGEKMVHVIDLDASEPAQWLALLQAFNSRPEGPPHLRITGVHHQKEVLEQM  
AHLIEEAEKLDIPFQFNPVVSRDLCLNVEQLRVKTGEALAVSSVLQLHTFLA  
SDDDLMRKNCALRFQNNPSGVLDLQRVLMMSHGSAEARENDMSNNNGYSP  
SGDSASSLPLPSSGRDTSFLNAIWGLSPKVMVTEQSDHNGSTLMERLLES  
YTYAALFDCLTKVPRTSQDRIKVEKMLFGEEIKNIISCEGFERRERHEKLEK  
WSQRIDLAFGNVPLSYAYMLQARRLLQGCGFDGYRIKEESGCAVICWQDR  
PLYSVSAWRCRK

>AtSCL4

MAYMCTDSGNLMAIAQQVIKQKQQQEQQQQHHQDHQIFGINPLSLNPWPN  
TSLGFGLSGSAFPDPFQVTGGGDSNDPGFPFNLDHHHATTTGGGFRLSDFGG  
GTGGGEFESDEWMETLISGGDSVADGPDCTWHDNPDYVIYGPDPFDYPSR  
LSVQPSDLNRVIDTSSPLPPPTLWPPSSPLSIPPLTHESPTKEDPETNDSEDDDFD

LEPPLLKAIYDCARISDSDPNEASKTLLQIRESVSELGDPTEVAFYFTEALSNR  
LSPNSPATSSSSSSTEDLILSYKTLNDACPYSKFAHLTANQAILEATEKSNKIHI  
VDFGIVQGIQWPALLQALATRTSGKPTQIRVSGIPAPSLGESPEPSLIATGNRLR  
DFAKVLDLNDFIPILTPIHLLNGSSFRVDPDEVLA VNFMLQLYKLLDETPTIV  
DTALRLAKSLNPRVVTLGEYEVS LNRVGFANRVKNALQFYSAVFESLEPNLG  
RDSEERVRVERELFGRRISGLIGPEKTGIHRERMEEKEQWRVLMENAGFESVK  
LSNYAVSQAKILLWNYNYSNLYSIVESKPGFISLAWNDLPLLTSSWR

>AtSCL5

MRLSVFIIPLVESRQASGIINKQSTSLIRFSLYLEASISTKSFFSKSQRISQTQSPI  
CLSANYYPDNLDMEATQKHMIQEGSSMFYHQSSVKQMDLSVQTFDSYCT  
LESSSGTKSHPCLNKNNSSSTTSFSSNESPISQANNNNLSRFNNHSPEENNS  
PLSGSSATNTNETELSLMLKDLETAMMEPDVDNSYNNQGGFGQQHGVSVA  
MYRSMEMISRGD LKGVLYECAKAVENYDLEMTDWLISQLQQMVSVSGEPV  
QRLGAYMLEGLVARLASSGSSIIYKALRCKDPTGPELLTYMHILYEACPYFKF  
GYESANGAIAEAVKNESFVHIIDFQISQGGQWVSLIRALGARPGGPPNVRITGI  
DDPRSSFARQGGLELVGQRLGKLAEMCGVPFEFHGAALCCTEVEIEKLGVRN  
GEALAVNFPLVLHHMPDESVTVENHRDRLRLVKHLSPNVVTLVEQEANTN  
TAPFLPRFVETMNHYLA VFESIDVKLARDHKERINVEQHCLAREVVNLIACEG  
VEREERHEPLGKWRSRFHMAGFKPYPLSSYVNATIKGLLESYSEKYTLEERD  
GALYLGWKNQPLITSCAWR

>AtSCL6

MPLPFEEFQGGKISCFSSSFSSFPQPPSSPLLSHRKARGGEEEEEEVPAAEPTSV  
LDSLISPTSSSTVSSSHGGNSAVGGGGDATTDEQCGAIGLDWEEQVPHDHE  
QSILGLIMGDSTDPSELNSILQTSPTFHDSYSSPGFGVVDTFGLDHHSVPPS  
HVSGLLINQSQTHYTQNPAAIFYGHHHTPPPAKRLNPGPVGITEQLVKAAEV  
IESDTCLAQGILARLNQQLSSPVGKPLERA AFYFKEALNNLLHNVSQTLNPYS  
LIFKIAAYKSFSEISPVLQFANFTSNQALLESFHGFHRLHIIDFDIGYGGQWASL  
MQELVLRDNAAPLSLKITVFSPANHDQLELGFTQDNLKHFASEINISLDIQVL  
SLDLLGSISWPNSSEKEAVAVNISAAFSHLPLVLRVVKHLSPTIIVCSDRG CER  
TDLPFSQQLAHSLHSHTALFESLDAVNANLDAMQKIERFLIQPEIEKLVDRSR  
PIERPMMTWQAMFLQMGFSPVTHSNFTESQA ECLVQRTPVRGFHVEKKHNS  
LLLCWQRTEL VGVSAWRCRSS

>AtSCL7

MAYMCTDSGNLMAIAQQLIKQKQQQSQHQQQEEQEPEPNPWPNPSPFGFTL  
PGSGFSDPFQVTNDPGFHFPHLEHHQNA AVASEEFDSDEWMESLINGGDASQ  
TNPDFPIYGHDPFVSFPSRLSAPSYLNRVNKDDASQQLPPPASTAIWSPSPS  
PQHPPPPPPQPDFDLNQPIFKAIHDYARKPETKPD TLIRIKESVSESGDPIQRVG  
YYFAEALSHKETESPSSSSSSSLEDFILSYKTLNDACPYSKFAHLTANQAILEAT  
NQSNNIHIVDFGIFQGIQWSALLQALATRSSGKPTRIRISGIPAPSLGDSPGPSLI  
ATGNRLRDFAAILDLNFEFYPVLTPIQLLNGSSFRVDPDEVLVVNFMLELYKL  
LDETATTVTALRLARSLNPRIVTLGEYEVS LNRVEFANRVKNSLRFYSAVFE  
SLEPNLDRDSKERLRVERVLFGRRIMDLVRSDDDNNKPGTRFGLMEEKEQW  
RVLMEKAGFEPVKPSNYAVSQAKLLLWNYNSTLYSLVESEPGFISLAWNNV  
PLLTVSSWR



>AtSCL8

MESGFSGGGGGSDFYGGGGGRSIPGGPGTVINVGNNNPQTTYRNQIPGIFFDQ  
IGNRVAGNGFSGKRTLADFQAAQQHQQQQQQPFYSQAALNAFLSRSVKP  
RNYQNFQSPSPMIDLTSVNDMSLFGGSGSSQRYGLPVPRSQTQQQSDYGLF  
GGIRMGIGSGINNYPTLTGVPCIEPVQNRVHESENMLNSLRELEKQLDDDDDE  
SGGDDDVSVITNSNSDWIQNLVTPNPNPNVLSFSPSSSSSSSPSTASTTTSVC  
SRQTVMEIATAIAEGKTEIATEILARVSQTPNLERNSEEKLVDFMVAALRSRIA  
SPVTELYGKEHLISTQLLYELSPCFKLGFEANLAILDAADNNDGGMMIPHVI  
DFDIGEGGQYVNLRLTLSTRNGKSQSQNSPVVKITAVANNVYGCLVDDGGE  
ERLKA VGDLLSQLGDRLGISVSFNVTSLRLGDLNRESLGCDPDETLAVNLAF  
KLYRVPDESCTENPRDELLRRVKGLKPRVVTLVEQEMNSNTAPFLGRVSES  
CACYGALLESVESTVPSTNSDRAKVEEGIGRKL VNAVACEGIDRIERCEVFGK  
WRMRMSMAGFELMPLSEKIAESMKS RGNRVHPGFTVKEDNGGVCFGWMGR  
ALTVASAWR

>AtSHR

MDTLFRLVSLQQQQS SSIITNQSSLSRTSTTTTGSPQTAYHYNFPQNDVVEE  
CFNFFMDEEDLSSSSHHNHNHNPNNTYYPFTTPTQYHPATSSTPSSTAAA  
AALASPYSSSGHHNDPSAFSIPQTPPSFDFSANAKWADSVLLEAARAFSDKDT  
ARAQQILWTLNELSSPYGDTEQKLASYFLQALFNRMGTGSGERCYRTMVTAA  
ATEKTCSFESTRKT VLFKQEVSPWATFGHVAANGAILEAVDGEAKIHIVDISS  
TFCTQWPTLLEALATRSDDTPHLRLTTVVVANKFVNDQTASHRMMKEIGNR  
MEKFARLMGVPPKFNIIHHVGDLEFDLNELDVKPDEVLA INCVGAMHGIAS  
RGS PRDAVISSFRRLRPRIVTVVEEADLVGEEEGGFDFEFLRGFGECLRWFR  
VCFESWEESFPRTSNERLMLERAAGRAIVDLVACEPSDSTERRETARKWSRR  
MRNSGFGAVGYSDEVADDVRALLRRYKEGVWSMVQCPDAAGIFLCWRDQP  
VWASAWRPT

>AtRGA

MKRDHHQFQGRLSNHGTSSSSSSISKDKMMMVKKEEDGGGNMDELLAVL  
GYKVRSEMAEVALKLEQLETMMSNVQEDGLSHLATDTVHYNPSELYSWLD  
NMLSELNPPPLPASSNGLDPVLPSPICGFASDYDLKVIPGNAIYQFPAIDSSS  
SSNNQNKRLKSCSSPDSMVTSTSTGTQIGGVIGTTVTTTTTTTTAAGESTRSVI  
LVDSQENGVRLVHALMACAEAIQQNNLTLAEALVKQIGCLA VSQAGAMRK  
VATYFAEALARRIYRLSPPQNQIDHCLSDTLQMHFYETCPYLKFAHFTANQAI  
LEAFEGKKRVHVIDFSMNQGLQWPALMQALALREGGPPTFRLTGIGPPAPDN  
SDHLHEVGCKLAQLAEAIHVEFEYRGFVANSLADLDASMLELRPSDTEAVAV  
NSVFELHKLLGRPGGIEKVLGVVKQIKPVIFTVVEQESNHNGPVFLDRFTESL  
HYSTLFDLSLEGVPNSQDKVMSEVYL GKQICNLVACEGPDRVERHETLSQW  
GNRFGSSGLAPAHLGSNAFKQASMLLSVFNSGQGYRVEESNGCLMLGWHTR  
PLITTS AWKLSTAA Y

>AtSCL11

MDALLQVSVDGFRFENGSGSCCKPRNNLESGNNLFPDFHESQNQSSPNDSPPT  
VCLDNSPVLKYINDMLMDEEDFVGISRDDLALQAAERSFYEIQQQSPESDQN  
TSSSSDQNSGDQDFCFPSTTTDSSALVSSGESQRKYRHRNDEEDDLENRRNK  
QPAIFVSEMEELAVKLEHVLLVCKTNQEEEEERTVITKQSTPNRAGRAKGSSN

KSKTHKTNTVDLRSLLTQCAQAVASFDQRRATDKLKEIRAHSSSNGDGTQRL  
AFYFAEAEARITGNISPPVSNPFPSSTTSMVDILKAYKLVHTCPIYVTDYFA  
ANKSIYELAMKATKLHIVDFGVLYGFQWPCLLRALSKRPGGPPMLRVTGIEL  
PQAGFRPSDRVEETGRRLKRFCDQFNVPFEFNFIKWKWETITLDELMINPGETT  
VVNCIHLQYTPDETIVSLDSPRDTVLKLFKRDINPDLFVFAEINGMYNSPFFMT  
RFREALFHYSLLFDMFDTTIHAEDEYKNRSLLELLVRDAMSVISCEGAERF  
ARPETYKQWRVRILRAGFKPATISKQIMKEAKEIVRKRYHRDFVIDSDNNWM  
LQGWKGRVIYAFSCWKPAEKFTNNLNI

>AtSCL13

MQTSQKHHSAAAGLHMLYPQVYCSPPQFQAKDNKGFSDIPSKENFFTLLESSTAS  
GSLPSYDSPSVSITSGRSPFSPQGSQSCISDLHHSPDNVYGSPLSGVSSLAYDEA  
GVKSKIRELEVSLLSGDTKVEEFSGFSPAAGKSWNWDELLALTPQLDLKEVL  
VEAARAVADGDFATAYGFLDVLEQMVSVSGSPIQLRGTYMAEGLRARLEGS  
GSNIYKSLKCNEPTGRELMSYMSVLYEICPYWKFAYTANVEILEAIAGETRV  
HIIDFQIAQGSQYMFLIQELAKRPGGPPLLRVTGVDDSQSTYARGGGLSLVGE  
RLATLAQSCGVPFEFHDAIMSGCKVQREHLGLEPGFAVVVNFYVLHHPDE  
SVSVENHRDRLLHLIKSLSPKLVTLVEQESNTNTSPFLSRFVETLDYYTAMFES  
IDAARPRDDKQRISAEQHCVARDIVNMIACEESERVERHEVLGIWRVRMMM  
AGFTGWPVSTSAFAASEMLKAYDKNYKLGHEGALYLFWKRRPMATCSV  
WKPNPN

>AtSCL14

MGSYPDGFPGSMDELDFNKDFDLPPSSNQTGLGLANGFYLDLDFSSLDPPEA  
YPSQNNNNNNINNKAVAGDLLSSSSDDADFSDSLKYISQVLMEEDMEEKPC  
MFHDALALQAAEKSLYEALGEEKYSSSSASSVDHPERLASDSPDGSCSGGAFS  
DYASTTTTTSSDSHWSVDGLENRPSWLHTPMPNSNFVFQSTSRSNSVTGGGGG  
GNSAVYGGSGFGDDLVSNMFKDDELAMQFKKGVEEASKFLPKSSQLFIDVDSY  
IPMNSGSKENGSEVFKTEKKDETEHHHHHSYAPPPNRLTGKKSHWRDEDED  
FVEERSNKQSAVYVEESELSEMFDKILVCGPGKPCILNQNFPTESAKVVTAQ  
SNGAKIRGKKSTSTSHSNDSKKTADLRTLLVLCAQAVSVDDRRTANEMLRQ  
IREHSSPLGNGSERLAHYFANSLEARLAGTGTQIYTALSSKKTSAADMLKAYQ  
TYMSVCPFKKAAIIFANHSMRFTANANTIIIDFGISYGFQWPALIHRLSLSR  
PGGSPKLRTGIELPQRGFRPAEGVQETGHRLARYCQRHNVPEYNAIAQKWE  
TIQVEDLKLQGEYVVVNSLFRFRNLLDETVLVNSPRDAVLKLRKINPNVFI  
AILSGNYNAPFFVTRFREALFHYSVDFMCDLAREDEMRLMYEKEFYGRE  
IVNVVACEGTERVERPETYKQWQARLIRAGFRQLPLEKELMQLKLIENGY  
DKNFDVDQNGNWLLQGWKGRIVYASSLWVPSSS

>AtSCL15

MKIPASSPQDTTNNNNNTNSTDSNHLMSDEHVMRSMDWDSIMKELELDDDS  
APNSLKTGFTTTTTDSTILPLYAVDSNLPGFPDQIQPSDFESSDVYPGQNQTT  
GYGFNSLDSVDNGGDFIEDLIRVVDCVESDELQLAQVVLRLNQLRSPAGR  
PLQRAAFYFKEALGSFLTGSNRNPRLSSWSEIVQRIRAIKEYSGISPIPLFSHT  
ANQAILDSLSSQSSSPFVHVVDIFEIGFGGQYASLMREITEKSVSGGFLRVAVV  
AEECAVETRLVKENLTQFAAEMKIRFQIEFVLMKTFEMLSFKAIRFVEGERTV  
VLISPAIFRRLSGITDFVNNLRRVSPKVVVVDSEGWTEIAGSGSFRREFVSAL

EFYTMVLES LDAA APPGDLVKKIVEAFVLRPKISAAVETAADRRHTGEMTWR  
EAFCAAGMRPIQLSQFADFQAECLEKAQVRGFHVAKRQGELVLCWHGRAL  
VATSAWRF

>AtSCL16

MQIPTLIDSMANKLHKKPPPLLKLTVIASDAEFHPPPLLGISYEELGSKLVNFA  
TTRNVAMEFRIISSSYSDGLSSLIEQLRIDPFVFNEALVVNCHMMLHYIPDEILT  
SNLRSVFLKELRDLNPTIVTLIDEDSDFTSTNFISRLRSLYNYMWIPYDTAEMF  
LTRGSEQRQWYEADISWKIDNVVAKEGAERVERLEPKSR

>AtRGL1

MKREHNHRESSAGEGGSSSMTTVIKEEAAGVDELLVVLGYKVRSSDMADVA  
HKLEQLEMVLDGDISNLSDET VHYNPSDLSGWVESMLSDDLDPTRIQEKPDSE  
YDLRAIPGSAVYPRDEHVTRRSKRTRIESELSSTRSVVVLDSQETGVRLVHAL  
LACAEAVQQNNLKLADALVKHVGLLASSQAGAMRKVATYFAEGLARRIYRI  
YPRDDVALSSFDLQIHFYESCPYLKFAHFTANQAILEVFATAEKVHVIDLGL  
NHGLQWPALIQALALRPNPDPDFRLTGIGYSLTDIQEVGWKLGQLASTIGVNF  
EFKSIALNNLSDLKPEMLDIRPGLESVAVNSVFELHRLLAHPGSIDKFLSTIKSI  
RPDIMTVVEQEANHNGTVFLDRFTESLHYSSLFDSLEGPPSQDRVMSELFLG  
RQILNLVACEGEDRVERHETLNQWRNRFLGGFKPVSIGSNAYKQASMLLAL  
YAGADGYNVEENEGCLLLGWQTRPLIATSAWRINRVE

>AtSCL18

MLTSFKSSSSSE DATATTTENPPPLCIASSSAATSASHHLRLLFTAANFVSQS  
NFTAAQNLLSILSLNSSPHGDSTERLVHLFTKALSVRINRQQDQTAETVATW  
TTNEMTMSNSTVFTSSVCKEQFLFRTKNNNSDFESCYYLWLNQLTPFIRFGHL  
TANQAILDATETNDNGALHILDLDISQGLQWPPMLQALAERSSNPSSPPSLRI  
TGCCRDTVGLNRTGDRLTRFADSLGLQFQFHTLVIVEEDLAGLLLQIRLLALS  
AVQGETIAVNCVHFLHKIFNDDGDMIGHFLSAIKSLNSRIVTMAEREAHGD  
HSFLNRFSEAVDHYMAIFDSLEATLPPNSRERLTLEQRWFGKEILDVVAEET  
ERKQRHRRFEIWEEMMKRFGFVNVPIGSFALSQAKLLRLHYPSEGYNLQFL  
NNSLFLGWQNRPLFSVSSWK

>AtRGL2

MKRGYGETWDPPPPLPASRS GEGPSMADKKKADDDNNNSNMDELAVL  
GYKVRSSSEMAEVAQKLEQLEMVLSNDDVGSTVLNDSVHYNPSDLSNWVES  
MLSELNPPASSDLDTTRSCVDRSEYDLRAIPGLSAFPKEEEVFDEEASSKRIRL  
GSWCESSDESTRSVVLVDSQETGVRLVHALVACAEAIHQENLNADALVKR  
VGTLAGSQAGAMGKVATYFAQALARRIYRDYTAETDVCAAVNPSFEEVLEM  
HFYESCPYLKFAHFTANQAILEAVTTARRVHVIDLGLNQGMPALMQALA  
LRPGGPPSFRLTGIGPPQTENS DSLQQLGWKLAQFAQNMGVEFEFKGLAAESL  
SDLEPEMFETRPESETLVVNSVFELHRLLARSGSIEKLLNTVKAIKPSIVTVE  
QEANHNGIVFLDRFNEALHYSSLFDSLEDSYSLPSQDRVMSEVYLGRQILNV  
VAAEGSDRVERHETAAQWRIRMKSAGFDPIHLGSSAFKQASMLLSLYATGD  
GYRVEENDGCLMIGWQTRPLITSAWKLA

>AtSCR

MAESGDFNGGQPPPHSPLRTTSSGSSSSNNRGPPPPPPPLVMVRKRLASEMSS  
NPDYNNSSRPPRRVSHLLDSNYNTVTPQQPPSLTAAATVSSQPNPPLSVCGFS

GLPVFPSDRGGRNVMMMSVQPMQDSSSSSASPTVWVDAIIRDLIHSSTS SVSIPO  
LIQNVRDIIFPCNP NLGALLEYRLRSLMLLD PSSSSDPSPQTFEPLYQISNNPSPP  
QQQQQHQQQQQHKPPPIQQQERENSSTDAPPQETVTATVPAVQTNTAE  
ALRERKEEIKRQKQDEEGLHLLTLLQCAEAVSADNLEEANKLLLEISQLSTP  
YG TSAQRVAAYFSEAMSARLLNSCLGIYAALPSRWMPQTHSLKMVSAFQVF  
NGISPLVKFSHFTANQAIQEAFEKEDSVHIIDL DIMQGLQWPGLFHILASRPGG  
PPHVRLTGLGTSMEALQATGKRLSDFADKLG LPFECPLAEKVG NLDTERLN  
VRKREAVAVHWLQHSLYDVTGSDAHTLWLLQRLAPKVVTVVEQDLSHAGS  
FLGRFVEAIHYYSALFDSL GASYGEESEERHVVEQQLLSKEIRNVLA VGGPSR  
SGEVKFESWREKMQCGFKGISLAGNAATQATLLLGMF PSDGYTLVDDNGT  
LKLGWKDL SLLTASAWTPRS

>AtSCL9

MITEPSLTGISGMVNRNRLSGLPDQPSSHSFTPVTLYDGFNYNLSSDHINTVVA  
APENSVFIREEEEEEDPADD FDFSDAVLGYISQMLNEEDMDDKVCMLQESLD  
LEAAERSLYEAIGKKYPPSPERNLAF AERNSENLD RVPGN YTG GDCIGFGNG  
GIKPLSSGFTLDFRNPQSCSSILSVPQSNGLITIYGDGIDESSKNNRENHQSVWL  
FRREIEEANRFNPEENELIVNFREENCVSKARKNSSRDEICVEEERS SKLPAVF  
GEDILRSDVVDKILVHVPGGESMKEFNALRDV LKKGVEKKKASDAQGGKRR  
ARGRGRGRGRGGGGQNGKKEVVDLRSL LIHCAQAVAADDRRCAGQLLKQ  
IRLHSTPFGDGNQRLAHC FANGLEARLAGTGSQIYK GIVSKPRSAAAVLKAH  
QLFLACCPFRKLSYFITNK TIRDLVGNSQRVHVIDFGILYGFQWPTLIHRFSMY  
GSPKVRITGIEFPQPGFRPAQRVEETGQRLAAYAKLFGVPFEYKAI AKKWD AI  
QLEDLDIDRDEITV VNC LYRAENLHDES VKVESCRDTVLN LIGKINPDLFVFGI  
VNGAYNAPFFVTRFREALFH FSSIFDMLETIVPREDEERM FLEMEVFGREALN  
VIACEGWERVERPETYKQWHVRAMRSGLVQVPFDPSIMKTS LHKVHTFYHK  
DFVIDQDNRWLLQGWKGRTVMALS VWKPESKA

>AtSCL21

MDNVRGSIMLQPLPEIAESIDDAICHEL SMWPDDAKDLLLIVEAISRGDLKLV  
LVACAKAVSENNLLMARWCMGELRGMV SISGEPIQRLGAYMLEGLVARLA  
ASGSSIYKSLQSREPESYEF LSYVYVLHEVCPYFKFGYMSANGAIAEAMKDEE  
RIHIIDFQIGQGSQWIALIQAF AARPGGAPNIRITGVGDGSVLVTVKKRLEKLA  
KKFDVPPFRFNAVSRPSCEVEVENLDVRDGEALGVNFAYMLHHL PDESVSME  
NHRDRLLRMVKSLSPKVVTLVEQECNTNTSPFLPRFLETLSYYTAMFESIDVM  
LPRNHKERINIEQHCMARDV VNIACEGAERIERHELLGKWKS RFSMAGFEPY  
PLSSIISATIRALLRDYSNGYAIEERD GALYLGWMDRILVSSCAWK

>AtSCL22

MPLPFEQFQGKGV LGFLDSSSSPGYKIWANPEKLHGRVEEDLCFVVNNGGFS  
EPTSVLDSVRSPSPFVSSSTTLSSSHGGPSGGGAAAATFSGADGKCDQMGFE  
DLDGVLSSGGSPGQEQSIFRLIMAGDV VDPGSEFVGF DIGSGSDPVIDNPNPLFG  
YGFPPQNAPEEEKFQISINPNPGFFSDPPSSPPAKRLNSGQPGSQHLQWVFPFSD  
PGHESHDPFLTTPPKIAGEDQNDQDQSAVIIDQLFSAAAELTTNGGDNNPVLAQ  
GILARLNHNLNNNDDTNNNPKPPFHRAASYITEALHSL LQDSSLSPPSLSPQ  
NLIFRIAA YRAFSETSPFLQFVNFTANQTILESFEGFDRIHIVDFDIGYGGQWAS  
LIQELAGKRNRRSSAPSLKITAFASPSTVSDEFELRFTEENLRSFAGETGVSFEIE

LLNMEILLNPTYWPLSLFRSSEKEAIAVNLPISSMVSGYLPLILRFLKQISPNVV  
VCDRSCDRNNDAPFPNGVINALQYYTSLLES LDSGNLNNAEAATSIERFCVQ  
PSIQKLLTNR YRWMERSPPWRS LFGQC GFTPV TLSQTAETQAEYLLQRNPMR  
GFHLEKRQSSPSLVLCWQRKELVTVSAWKC

>AtSCL23

MTTKRIDRDLPSDDPSSAKRRIEFPEETLENDGAAAIKLLSLLQCAEYVATD  
HLREASTLLSEISEICSPFGSSPERVVAYFAQALQTRVISSYLSGACSPLSEKPLT  
VVQSQKIFSALQTYNSVSPLIKFSHFTANQAIFQALDGEDSVHIIDLDMQGLQ  
WPALFHILASRPRKLR SIRITGFGSSDLLASTGRRLADFASSLNLPFEFHPIEGII  
GNLIDPSQLATRQGEAVVHWMQHRLYDVTGNNLETLEILRRLKPNLITVVE  
QELSYDDGGSFLGRFVEALHYYSALFDALGDGLGEESGERFTVEQIVLGTEIR  
NIVAHGGGRRKRMKWKEELSRVGF RPVSLRGNPATQAGLLLGMPLPWNGYT  
LVEENGLRLGWKDL SLLTASAWKSQPF D

>AtPAT1

MYKQPRQELEAYYFEPNSVEKLRYPVNNRKRFC TLEPFPD SPPYNALSTAT  
YDDTCGSCVTDELNDFKHKIREIETVMMGPDSL DLLVDCTDSFDSTASQEING  
WRSTLEAISRRDLRADLVSCAKAMSENDLMMAHSMMEKLRQMVS SVSGEPIQ  
RLGAYLLEGLVAQLASSGSSIIYKALNRCPEPASTELLSYMHILYEVC PYFKFG  
YMSANGAIAEAMKEENRVHIIDFQIGQGSQWVT LIQAF AARPGGPPRIRITGID  
DMTSAYARGGGLSIVGNRLAKLAKQFNVPFEFNSVSVSVSEVKPKNLGVRPG  
EALAVNFAFVLHHPDES VSTENHRDRLLRMVKSLSPKVVT LVEQESNTNTA  
AFFPRFMETMNYAAMFESIDVTLPRDHKQRINVEQHCLARDV VNIACEGA  
DRVERHELLGKWRSRFGMAGFTPYPLSPLVNSTIKSLLRNYSDKYRLEERDG  
ALYLGWMHRDLVASC AWK

>AtRGL3

MKRSHQETSVEEEAPSMVEKLENGCGGGGDDNMDEFLAVLGYKVRSSDMA  
DVAQKLEQLEMVLSNDIASSSNAFN DTVHYNPSDLSGWAQSMLS DLNYYPD  
LDPNRICDLRPITDDDECCSSNSNSNKRIRLGPWCDSVTSESTRSVLIEETGV  
RLVQALVACA EAVQLENLSLADALVKRVGLLAASQAGAMGKVATYFAEAL  
ARRIYRIHPSAAAIDPSFEEILQMN FYDSCPYLKF AHFTANQAILEAVTTSRVV  
HVIDLGLNQGMQWPALMQALALRPGGPPSFRLTGVGNPSNREGIQELGWKL  
AQLAQAIGVEFKFNGLTTERLS DLEPDMFETRTESETLVVNSVFELHPVLSQP  
GSIEKLLATVKAVKPGLVTVVEQE ANHNGDVFLDRFNEALHYSSLFDSLED  
GVVIPSQDRVMSEVYLGRQILNLVATEGSDRIERHETLAQWRKRMGSAGFDP  
VNLGSDAFKQASLLLALS GGGDGYRVEENDGSLMLAWQTKPLIAASAWKLA  
AELRR

>AtSCL26

MNYPYEDFLDLFFSTHTDPLATAASTSSNGYSLNDLDIDWDCDFRDVIESIMG  
DEGAMMEPESEAVPMLHDQEGLCNSASTGLSVADGV SFGEPKTDESKGLRL  
VHLLVAAADASTGANKSRELTRVILARLKD LVSPGDRTNMERLAAHFTNGLS  
KLLERDSVLCPQQHRDDVYDQADVISAFELLQNMSPYVNF GYL TATQAILEA  
VKYERRIHIVDYDINEGVQWASLMQALVSRNTGPSAQHLRITALSRATNGKK  
SVA AVQETGRRLTAFADSIGQPF SYQHCKLDTNAFSTSSLKLV RGEAVVINC  
MLHLPRFSHQTPSSVISFLSEAKTLNPKLVTLVHEEVGLMGNQGFLYRFMDLL

HQFSAIFDSLEAGLSIANPARGFVERVFIGPWVANWLTRITANDAEVESFASW  
PQWLETNGFKPLEVSFTNRCQAKLLLSLFNDGFRVEELGQNGLVLGWKSRRLL  
VSASFWASCQTNQ

>AtSCL27

MPLSFERFQEGEVFGLSSSSFYSDSQKIWSNQDKTEAKQEDLGYVVGGLPEP  
TSVLDALRSPPLASYSSTTTTLSSSHGGGGTTVTNTTFTAGDDNNNNKCSQ  
MGLDDLDGVLSSASSPGQEQSILRLIMDPGSAFGVFDPGFGFGSGSGPVSAPVS  
DNSNLLCNFPFQEITNPAEALINPSNHCLFYNPPLSPPAKRFNSGSLHQPVFPLS  
DPDPGHDPVRRQHQQFQPFYHNNQQQFPSSSSSTAVAMVPVPSPGMAGDD  
QSVIIEQLFNAELIGTTGNNNGDHTVLAQGILARLNHHLNTSSNHKSPFQRA  
ASHIAEALLSLIHNESSPLITPENLILRIAAYRSFSETSPFLQFVNFTANQSILES  
CNESGFDRIHIDFDVGYGGQWSSLMQELASGVGGRRRRNRASSLKLTVFAPPP  
STVSDEFELRFTEENLKTFAAGEVKIPFEIELLSVELLLNPAYWPLSLRSSEKEAI  
AVNLPVNSVASGYLPLILRFLKQLSPNIVVCSDRGCDRNDAPFPNAVIHSLQY  
HTSLLESLDANQNQDDSSIERFWVQPSIEKLLMKRHRWIERSPPWRILFTQCG  
FSPASLSQMAEAQAECLLQRNPVRGFHVVEKRQSSSLVMCWQRKELVTVSAWK  
C

>AtSCL28

MLAGCSSSSLLSPTRRLRSEAVAATSATVSAHFPMNTQRLDLPCSSSFSRKETP  
SSRPLGRSISLDNSNNNNNKPIERKTKTSGCSLKQNIKLPLATTRGNGEGFSW  
NNDNNNRGKSLKRLAEEDESCLSRKRTKCENEGGFWEHFTGQDSSSPALP  
FSLTCSGDDEEKVCFVPSEVISQPLPNWVDSVITELAGIGDKDVESLPAAVKE  
ASGGSSTSASSESRSLSHRVPEPTNGSRNPYSHRGATEERTTGNINNNNNRND  
LQRDFELVNLLTGCLDAIRSRNIAAINHFIARTGDLASPRGRTPMTRLIAYYIE  
ALALRVARMWPHIFHIAPPREFDRTVEDESGNALRFLNQVTPIPKFIHFTANE  
MLLRAFEGKERVHIIDFDIKQGLQWPSFFQSLASRINPPHHVRITGIGESKLELN  
ETGDRLHGFAEAMNLQFEFHPVVDRLLEDVRLWMLHVKEGESVAVNCVMQ  
MHKTLYDGTGAAIRDFLGLIRSTNPIALVLAEQEAHNSEQLETRVCNSLKY  
SAMDFAIHTNLATDSL MRVKVEEMLFGREIRNIVACEGSHRQERHVGFRHWR  
RMLEQLGFRSLGVSEREVLQSKMLLRMYGSDNEGFFNVERSDENGGEGGR  
GGGVTLRWSEQPLYTISAWTTGGN

>AtSCL29

MLLEETEPPNQTLDHVLSWLEDSVLSPLPGFDDSYLLHEFDGSQTWEWDQT  
QDPEHGFIQSYSQDL SAA YVGCEATNLEV VTEAPSIDLDLPPEIQQPNDQSRK  
RSHDGFLEAQQVKK SARSKRKA IKSSEKSSK DGNKEGRWAEKLLNPCALAIT  
ASNSSRVQHLYCVLSELASSSGDANRRLA AFGLRALQHHLSSSSVSSSFWPVF  
TFASAEVKMFQKTLLKFYEVSPWFALPNMANSAILQILAQDPKDKKDLHIID  
IGVSHGMQWPTLLEALSCRLEGPPRVRITVISDLTADIPFSVGPYNYGSQ  
LGFARSLKINLQISVLDKQLIDTSPHENLIVCAQFRLHHLKHSINDERGETLK  
AVRSLRPGKVLCENNGECSSSADFAAGFSKKLEYVWKFLDSTSSGFKKEENS  
EERKLMEGEATKVL MNAGDMNEGKEK WYERMREAGFFVEAFEEDA VDGA  
KSLLRKYDNNWEIRMEDGDTFAGLMWKGEAVSFCSLWK

>AtSCL30

MDAILPVPVDGFRFDTGSGSCCKPRNNLES GTTNRFTCFNESESQSNPSPTESK  
VCS DYLPVFKYINDMLMEEDLEGQSCMLEDSLALQAAERSFFEVLQDQTPIS  
GDLEDGSLGNFSSITSLHQPEVSEESTRRYRHRDDDEDDLESGRKSKLPAIST  
VDELAEKFEVLLVCQKNDQGEATEKKTRHVKGSSNRYKQKSDQPVD MR  
NLLMQCAQAVASFDQRRAFEKLKEIREHSSRHGDATQRLGYHFAEAEARIT  
GTMTTPISATSSRTSMVDILKAYKGFVQACPTLIMCYFTANRTINELASKATTL  
HIIDFGILYGFQWPCLIQALSKRDIGPPLL RVTGIELPQSGFRPSERVEETGRRL  
KRFCDKFNVPFEYSFIAKNWENITLDDL VINSGETTVVNCILRLQYTPDET VSL  
NSPRDTALKLFRDINPDLFVFAEINGTYNSPFFLTRFREALFHCSLFDMYETT  
LSEDDNCR TLVERELIIRDAMSVIACEGSERFARPETYKQWQVRILRAGFRPA  
KLSKQIVKDGKEIVKERYHKDFVIDNDNHWMFQGWKGRVLYAVSCWKPAK  
K

>AtSCL31

MESNYSGVVNGYDVSFLPTSIPDLGFGVPSSSDFDLRMDQYYHQPSIWVPDQ  
DHHFSPPADEIDSENTLLKYVNQLLMEESLAEKQSIFYDSLALRQTEEMLQQV  
ISDSQTQSSIPNNSITSSSSNSGDYSNSSNSSVRIENEVLFDNKHLGDSGVV SFP  
GSNMLRGGEQFGQPANEILVRSMSFDAESVLQFKRGLEEASKFLPNTDQWIF  
NLEPEMERVVPVKVEEGWSAISKTRKNHHEREEEEDDLEEARRRSKQFAVNE  
EDGKLT E MFDKVLLLDGECDPQIIEDGENGSSKALVKKGRAKKKSRAVDFRT  
LLTLCAQSVSAGDKITADDLLRQIRKQCSPVGDASQRLAHFFANALEARLEGS  
TGTMIQSYYSISSKKRTAAQILKSYSVFLSASPMTLIYFFSNKMILDAKDA  
SVLHIVDFGILYGFQWPMFIQHLSKSNPGLRKLRLITGIEIPQHGLRPTERIQDTG  
RRLTEYCKRFGVPFEYNAIASKNWETIKMEEFKIRPNEVLAVNAVLRFKNLR  
DVIPGEEDCPRDGLKLRDMNPVFLSSTVNGSFNAPFFTTRFKEALFHYSAL  
FDLFGATLSKENPERIHFEGEFYGREVMNVIACEGVDRVERPETYKQWQVRM  
IRAGFKQKPVEAELVQLFREKMKKWGYHKDFVLDEDSNWFLQGWKGRILFS  
SSCWVPS

>AtSCL32

MTKTRILNPTRFSPKPLRGCGDANFMEQLLLHCATAIDSNDAAL THQILWVL  
NNIAPPDGDSTQRLTSAFLRALLSRAVSKTPTLSSTISFLPQADELHRFSVVELA  
AFVDLTPWHRFGFIAANAAILTAVEGYSTVHIVDLSLTHCMQIPTLIDAMASR  
LNKPPPLLKLTVVSSSDHFPPFINISYEELGSKLVNFATTRNITMEFTIVPSTYSD  
GFSSLLQQLRIYPSSFNEALVVNCHMMLRYIPEEPLTSSSSSLRTVFLKQLRSL  
NPRIVTLIEEDVDLTSENLVNRLKSAFN YFWIPFDTTDTFMSEQRRWYEA EIS  
WKIENVVAKEGAERVERTETKRRWIERMREAEFGGVRVKEDAVADV KAML  
EEHAVGWGMKKEDDDESLVLTWKGHSVVFATVWVPI

>AtSCL33

MGSYSAGFPGLDWFDFPGLGNGSYLNDQPLLDIGSVPPPLDPYPQQNLASA  
DADFSDSVLKYISQVLMEEDMEDKPCMFHDALSLQAAEKSLYEALGEKYPV  
DDSDQPLTTTTSLAQLVSSPGSSYASTTTTSSDSQWSFDCLENNRPSWLQ  
TPIPSNFIFQSTSTRASSGNAVFGSSFSGDLVSNMFNDTDLALQFKKGMEEASK  
FLPKSSQLVIDNSVPNRLTGKKSHWREEEHLTEERSKKQSAIYVDETDEL TDM  
FDNILIFGEAKEQPVCILNESFPKEPAKASTFSKSPKGEKPEASGNSYTKETPDL  
RTMLVSCAQAVSINDRRTADELLSRIRQHSSSYGDGTERLAHYFANSLEARLA

GIGTQVYTALSSKKTSTSDMLKAYQTYISVCPFKKIAIIFANHSIMRLASSANA  
KTIHIIDFGISDGFQWPSLIHRLAWRRGSSCKLRITGIELPQRGFRPAEGVIETGR  
RLAKYCQKFNIPFEYNIAIAQKWESIKLEDLKLKEGEFVAVNSLFRFRNLLDET  
VAVHSPRDTVLLKLRKIKPDVFIPIGILSGSYNAPFFVTRFREVLFHYSSLFDMC  
DTNLTREDPMRVMFEKEFYGREIMNVVACEGTERVERPESYKQWQARAMR  
AGFRQIPLEKELVQKLKLMVESGYKPKFEFDVDQDCHWLLQGWKGRIVYGSSI  
WVPPFFYVGRATRVLIMDPNFSESLNGFEYFDGNPNLLTDPMEDQYPPPSDTL  
LKIVSEILMEESNGDYKQSMFYDSLALRKTEEMLQQVITDSQNQSFSPADSLI  
TNSWDASGSIDESAYSADPQPVNEIMVKSMFSDAESALQFKKGVVEEASKFLP  
NSDQWVINLDIERSERRDSVKEEMGLDQLRVKKNHERDFEVRSSKQFASNV  
EDSKVTD MFDKVLLLDGECDPQTLLDSEIQAIRSSKNIGEKGKKKKKKKSQV  
VDFRLLTHCAQAISTGDKTTALEFLLQIRQQSSPLGDAGQRLAHCANALEA  
RLQGSTGPMIQTYYNALTSSLKDTAADTIRAYRVYLSSSPFVTLMYFFSIWMI  
LDVAKDAPVLHIVDFGILYGFQWPMFIQSISDRKDVPRKLRTGIELPQCGFRP  
AERIEETGRRLAEYCKRFNVPFEYKAIASQNWETIRIEDLDIRPNEVLAVNAGL  
RLKNLQDETGSEENCPRDAVLKLRNMNPDVFIHAIVNGSFNAPFFISRFEAV  
YHYSALFDMFDSTLPRDNKERIRFEREFYGREAMNVIACEEADRVERPETYR  
QWQVRMVRAGFKQKTIKPELVELFRGKLLKWRVYHKDFVVDENSKWLLQG  
WKGRTLYASSCWVPA

>Al 493792

MTTKRIDRDFPSSDDPSAAAKRRVNDIEFPEETLENDGAAAAIKLLSLLLQCA  
EYVATNHLREASTLLSEISEICSPFGSSPERVVAYFAQALQTRVISSYLSGACTP  
LSEKPLTVVQSQRLFSALQTFNSVSPLIKFSHTANQAIFQALDGEDSVHIIDL  
VMQGLQWPALFHILASRPRKLSIRITGFGSSDLLASTGRRLADFASSLNLPF  
EFHPIEGKIGNLIDPSQLGTRQGEAVVHWMQHRLYDVTGNDLETLEILRRLK  
PNLITVVEQELSYDDGGSFLGGFVEALHYYSALFDALGDGLGEESGERFTVEQ  
IVLATEIRNIVAHGRRRRRMKWKELNRVGFPRVSLRGNPAMQAGLLLGM  
LPWNGYTLVEENGTLRLGWKDLSLLTASAWKSQPF\*

***Brachypodium dystachion***

> Bd Bradi2g57940

MGMSPSPFTTSYCLTEQDASICTETQELDYHHSYYYGIEDVSLDEVELELAAS  
SGRAHKATKVDYHSSPYHISWPPPPQASADVESSRVRKKQFRDVLESCKQK  
VEAMEAMEQHSPPLSGGGVGFQDQQGDSGHGVAVGGEGSSNSGGGTDGMR  
LVQLLVACAEAVACRDRAQAASLLRELQAGAPVHGTAQFQVASCVFVQGLAD  
RLALAHPPALGPASMAFCIPQSSSSASCAGRGEALAVAYEVCPLYRFAHFVA  
NASILEAFEGESKVHVVDLGM TLGLDRAHQWRALLDGLAARGVARPARVR  
VTGVGARVDAMRAVGLLEAYAEELGMCVEFRAIDRTLES LHVDDLGV EAD  
EAVAINSVLELHCVVKESRGALNSVLQTIRK LKAPKAFVLVEQDAGHNGPFFL  
GRFMEALHYAALFDALDAALPRYDARRARVEQFHFGAEIRNVVGCEGAAR  
VERHERADQWRRRMSRAGFQSMPIKMAAKAREWLEENAGGTGYTVAEEKG  
CLVLGWKGKPVIAASCWKC\*

***Carica papaya***

>Cp evm.TU.supercontig\_34.30



MNSWDSFSKHETLNHELAIIRRFCPARLEQEQGVSDQWSIDTVNDSVFSPLPHD  
QYHHDHNYIHQNVTTTHGLPASDVNEFVDSFINMDHHDGQYDDHDHQND  
GNKSLQVKTYLLDHHHDDHLHQQNWSGESDYNRYFPMMPGGDHEVDL  
YGSSVSHGVDQGLYL VHLLACAEAVGCRDTKLADSILAQIWSSATLMGDSL  
QRVSYCFAMGLKSRLSLLQTVTANGTFTNGGNHVCWVTMEEKMEAFHLLY  
QTPFIAFGFMAANEICQATQGGKYSLHIIDLGMETHLQWPSLIRNLASRPEGP  
PKKLKITAINDQYRIELEGSTKLLVEEANS LGIPLEIYMISEPATPTLMTREKLG  
LEEAGEALLVNSIMHLHKYVKESRGLKAILQAIKKLSPTLLTVVEQDANHNGP  
FFLGRFLESLHYSAIFDSLEASLLRNSPQRMKIEKYHFAEEIRNIVAYEGLDR  
VERHERADQWRRQLGRAGYQVMGLKCLS QARMMLSVYGC DGYTL SCEKG  
CLLGGWKGRPIMLASAWQANNSSS\*

*Citrus cinensis*

>Cs orange1.1g040125m.g

MVYDFLFNTHKLYNDQRSNQAIGLQLGLSIVDCYPYLPMMSDNSAASSMML  
QPRDQKRLKRTISVADSIAGDGSPTSTLSRSSSSSSSLSNL PRLQFRDHIWYTYTQ  
RYLAAEA VEEAAAAMTKAVDGC GGDDQDGTADGMRLVQLLIACAEAVAC  
RDKSHASALLSELRANALVFGSSFQRVASCFVQGLADRLASVQPLGAVGSFA  
PSMNIMDIAGSREKEEAFRLVYEICPHIQFGHFVANSSILEAFEGESFVHVVDL  
GMTLGLPRGQQWRRRIESLANRAGQPPRRLRITAVGLCVEKFQSIGDELKDY  
AKTYGINLEFSVVESNLENLQTKDIKVLNEVLV VNSILQLHCVVKESRGALN  
SVLQIIHELSPKVLV LVEQDSSHNGPFFLGRFMEALHYSAIFDSL DAMLPKY  
DTKRAKIEQFYFAEEIKNIVSCEGP ARVERHERVDQWRRRMSRAGFQAAPMK  
MINQAQKWLKNNKVCEGYTVVEEKGCLVLGWKSKPIIATSCWKC\*

*Citrus clementina*

>Ccl Ciclev10031305m.g

MEWGMYWRHGLCLDDKNNEVMGLDLNYSATACYRCFNLSTLANHSCTWS  
TSDETR NHKRIKKTSMIDESSGSSSRLCNSLNSLPRLQFRDHVWVYTYTQRYLAI  
EAMEEAALAMMAGKDTEVKEEGNGDGMKLVQQLIACAEAVACRDKAHAS  
ALLLELRVNALVFGTSFQRVASCFVQGLSDRLALVQPLGAVGVVGPAAKSM  
AITSQRDESLSLFYEICPQIQFGHFVANASILEAFEGESLVHVVDLGMTLGLPH  
GRQWHSMLQSLVNRSGKVPKRLKITGVGNCSERLGEIGDELKRYADGLKLSF  
EFLAVEKSLET LQAKDINVEDGEVLVMNSILELHCVVKESRGALNSVLQRLH  
QLSPKVVMLVEQDSSHNGPFFLGRFMEALHYSAIFDSL DAMLPKYDTKRAK  
IEQFYFAEEIKNIVSCEGP ARVERHERVDQWRRRMSRAGFQSVPIKMLMQAK  
QWLRKVQTCEGYTIIEEKGCLVLGWKSKPIIAASCWKCS\*

>Ccl Ciclev10019777m.g

MVYDFLFNTHKLYNDQRSNQAIGLQLGLSIVDCYPYLPMMSDNSAASSMILQ  
PRDQKRLKRTISVGDGSPTSTLSRSSSTSSLSNL PRLQFRDHIWYTYTRRYLAAE  
AVEEAAAAMIKSEDGCDGDQDGTADGMRLVQLLIACAEAVACRDKSHAS  
ALLSELRANALVFGSSFQRVASCFVQGLADRLASVQPLGAVGSFAPSMNIMDI  
AGSREKEEAFRLVYEICPHIQFGHFVANSSILEAFEGESFVHVVDLGMTLGLPR  
GQQWRRRIESLANRAGQPPRRLRITAVGLCVEKFQSIGDELKDYAKTYGINLE  
FSVVESNLENLQTKDIKVLNEVLV VNSILQLHCVVKESRGALNSVLQIIHEL  
PKVLV LVEQDSSHNGPFFLGRFMEALHYSAIFDSL DAMLPKYDTKRAKIEQ

FYFAEEIKNIVSCEGPARGVERHERVDQWRRRMSRAGFQAAPMKMINQAQKW  
LKNNKVCEGYTVVEEKGCLVLGWKSKPIIATSCWKC\*

>20816852\_peptide|Clementina|Ciclev10018153m.g|Ciclev10018153m

MINSVCGTVGTLKSENSSSSIKIHPTSPNESSISETKRTPQSSDLEQPSSLTPPSL  
NFPPLKFEIDGDVEVQSPDCSIWETFFSDHLDGDFMISSPVRNLPSPRTSAYNN  
NYNYNYAQSMQGGQSLSGCSPPRFSAQVGAFFSSSLRAKGGQSPLHKVFNSPGNQ  
YMQPENLALTTAIEDFLEDYQKDGYGFMFSPMKICGGGGGGGGSSPQLIDMPTT  
VPATLECLPMTNNNPSRFSGPVSESSSTAGASQHDNDIYQMGSIAAAPLSQQL  
QQEQLQERQQTQQQLQAQQQQQNLNHSLMVPLPISSEQEQDGLQLVHL  
LLACAEAVAKEDFMLARRYLHHLNRVVSPLGDSMQRVASCFTALSARLAA  
TLTKPSTSTPTPFSPFPNSLEVLKIYQIVYQACPYVKFAHFTANQAIFEAFAE  
EERVHVIDLDILQGYQWPAFMQALAAPGGAPFLRITGVGATIESAKETGRCL  
TELAHSLHVPFEFHPVGEQLEDLKPMMFNRRVGEALAVNAVNLHRVPSNCL  
GNLLAMIRDQAPNIVTIVEQEASHNGPYFLGRFLEALHYSAIFDSLDAFPPD  
SAQRAKVEQYIFAPEIRNIVACEGGERTARHERLEKWRKIMEGKGFGRGVPLSA  
NAVTQSKILLGLYSCDGYRLTEDNGCLLLGWQDRALLAASAWRC\*

*Citrus sinensis*

>Cs orange1.1g037028m.g

MAPDFQWRHGLCLDDKDNEAMGLDLNYSATACYRCFNLSTLANHSCTWST  
SDETRNHKRIKKTSMIDESSGSSSRLCNSLNSLPRLQFRDHVWVYTQRYLAIE  
AMEEAALAMMIDKDTEVKEEGNGDGMKLVQQLIACAEAVACRDKAHASAL  
LSELRVNALVFGTSFQRVASCFVQGLSDRLALVQPLGAVGVVGSAAKSMAIT  
SERDESLSLVYEICPQIQFGHFVANASILEAFEGESLVHVVDLGMTLGLPHGR  
QWHSLMQSLVNRSGKVPKRLKITGVGNCSERLGEIGDELKRYADGLKLNFEF  
LAVEKSLETQAKDINVEDGEVLVMNSILELHCVVKESRGALNSVLQRLHQL  
SPKVVMLVEQDSSHNGPFFLGRFMEALHYSAIFDSLDAMLPKYDTKRAKIE  
QFYFAEEIKNIVSCEGPARGVERHERVDQWRRRMSRAGFQSVPIKMLMQAKQ  
WLRKVQTCGYTIIIEKGCLVLGWKSKPIIAASCWKCS\*

*Cucumis sativus*

>Csa Cucs.196250

MVLGDGGSFFSTDFTSVTKEDEDTMGDSGAHWLSLLDDTTASSRWVISFS  
DEFRHKRLKIETESTPTEDGSGNSSNNSSLSRSNSCDSLSTGFRAHIWTYNQR  
YLAAEAVEEAAAIAEESAAEEDASADGMRLHLLVACAEAVACRDRSH  
ASILLSELNANALVFGSSFQRVASCFVQGLADRLALVQPLGYVGFGLPMSRV  
DHSSDRKKKDEALNLAYEIPHIQFGHFVANSSILEVFEGENSVHVLDLGMAF  
GLPYGHQWHSLIERLAESSNRLLRVTGIGLSVNRVYRVMGEKLLKAHAEGVG  
VQVEVLAVEGNLENLRPQDIKLHDGEALVITSIFQMHCVVKESRGALTSVLR  
MIYDLSPKALVLEQDSNHNGPFFLGRFMEALHYSAIFDSLDAMLPKYDTR  
RAKIEQFYFAEEIKNIVSCEGMARVERHERVDQWRRRMSRAGFQASPIKVMA  
QAKQWIGKFKANEGYTIVEEKGCLVLGWKSKPIVAASCWKC\*

*Eucalyptus grandii*

>Eg Eucgr.H04688

MSLGYLQPELYSEDQYDESHVLDLNLSTLECYSVSSTSSLQSIHRCFLDETRN  
CKRLKVEPSIGESIESKEIVHRGCSGMRTNSSNSLRKLQFRDHIWAYTQRYLA

VEAMEEAAAAMQDAMKLVQRLIACAEAVACRDKTHASALLSELSSKALVF  
GTSFQRVASCFVQGLVDRLALVQPSGAVGIVGQSAREMVMTNEKEEALRLV  
YEICPYIQFSHFIANESILEAFEGESSIHVVDLGMTQGLPHVHQWRNLISLAKR  
PGSSSRCLKISGVGNCEGLQTIGDKLKHYAKGLGVNFEFLMVQSNLENLQA  
EDFSILEGEVLVINSILQLHCVVKESRGALNSVLQILHKLSPKLLVLVEQDSSH  
NGPFFLGRFMEALHYYS AIFDALDAML PKYDTRRAKIEQFFFAEEIKNIVSCE  
GPARVERHERIDQWRRRMSRAGFQSAPIKMLTKAKQWLAKFKVCEGYTIVE  
EKGCLVLGWNSKPIAASCWKCS\*

>Eg Eucgr.K02752.1

MLVYCDPEEEEEARGKKRPKRTYSFAESIGSNSPRAYTGGFGSGGISRSSSMSS  
LDTFPRLHFRDHIWTYSQQYVAVEAVEEAAA AVSVGGGEEEDGTADGMRL  
QLLVACAEAVACRDKLQASSLSELRSRALVFGTSFQRVASCFVQGLADRLS  
LLQPLGTLGFISPAVVAASGAAAPDEKEEALRLAYKICPYIQFGHFVANTSIL  
EAFEGENFVHVVDLGM SLGLPGGHQWRRLIQSLAGRHGQPPRRLRITAIGLS  
AEKFCSIGDELSAYALNFGINLDILQLHCVVKESRGALNSVLQMIHNLSPKVL  
VLVEQDSSHNGPFFLGRFMEALHYYS AIFDSLDMPLPKYDTRRAKVEQFYFA  
EEIKNIVSCEGPARVERHERVDQWRRRMTRAGFQLAPIKMAQAKQWL GK  
NKVCEGYTVVEEKGCLVLGWNSKPIVAASCWKCS\*

***Fragaria vesca***

>Fve gene22702-v1.0-hybrid

MAPGHGRRFMTEHECTDHEIRSNRMSDLELHGLNHSSMACYSSYPYMASLD  
QEGSANDSSSLINPYSVHESRDRKRLKRTISIDDSLSSITSINGMMSRSSSTNS  
LTTLPRLHFRDHIWTYTQRYLAAEAVEEAAAAMINAEENGAEQEDGTADGM  
RLVQLLIACAEAVACRDKSHASALLSELRANALVFGSSFQRVASCFVQGLAS  
RLALVQPLGAVGFVPSKLNADYALMDKKEEALRLVYEICPHIQFGHFVANS  
SILEAFEGESFVHVVDLGMTLGLPHGDQWRGLIHSLTTRAGQPPVSRLRITGV  
GLCADRLQIIGEELEAYADSLGLSVEFTCVESNLENLKPEDIKLYEGEVLVNS  
ILQLHCVVKESRGALNSVLQMIHELSPKVLVLVEQDSSHNGPFFLGRFMEALH  
YYS AIFDSLDMPLPKYDTRRAKMEQFYFAEEIKNIISCEGPARVERHERVDQ  
WRRRMSRAGFQGAPIKMAQAKQWL GK NKVCEGYTVVEEKGCLVLGWKS  
RPIVAASCWKCS\*

***Glycine max***

>Gm Glyma17g13680

MAPLYSAFNGEIDGENLPLAFDIWATNLWAYGYYPHQPAISENSSSKLVDFPF  
CDGTIIRDNKRVKRTVCFPIYNSVSCHSFFNTNSSSRNSIPKLFHFRDHIRTQTQR  
YLAAEPVEEASEDTNSSSESSGGEEDGCADGVRLVQLLIACAEAVACRDKSHA  
SILLSELKANALVFGSSFQRVASCFVQGLTERLNLIQPIGSAGPMMAPAMNIM  
DAASDEMEEAYRLVYELCPHIQFGHYLANSTVLEAFEGESFVHVVDLGM SLG  
LRHGHQWRALIQSLANRASGERVRRLRITGVGLCVRLQTIGEELSVYANNLGI  
NLEFSVVKNLLENLKPEDIEVREEEVLVNSILQLHCVVKESRGALNSVLQMI  
HGLGPKVLVMVEQDSSHNGPFFLGRFMESLHYYSIFDSLDMPLPKYDTKRA  
KMEQFYFAEEIKNIVSCEGPLRMERHERVDQWRRRMSRAGFQA APIKMVAQ  
SKQWLLKNKVCEGYTVVEEKGCLVFGWKS RPIVAVSCWKCS\*

>Gm Glyma05g03020

MAPPYSAYNGEIDGENLPLAFDIWENLWAYGYYPHQPISEINSTSTLVDFPFC  
DGTIVRDNKRKRVKRTVCFPIYNSINCHSFFNTNNSSSSRNSIPKLHFRDHIRTYTQ  
RYLAAEPVEDTNSSESSGGEEDGCADGVRLVQLLIACAEAVACRDKSHASILL  
SELKANALVFGSSFQRVASCFVQGLIERLNLIQPIGPAGPMMPSMMNIMDVAS  
DEMEEAFRLVYELCPHIQFGHYLANSTILEAFEGESFVHVVDLGMSLGLRHG  
HQWRGLIQNLAGRVGGERVRRLRITGVGLCERLQTIGEELSVYANNLGVNLE  
FSVVEKNLENLKPEDIKVREEEVLVNSILQLHCVVKESRGALNSVLQMIHGL  
GPKVLMVEQDSSHNGPFFLGRFMESLHYYSSIFDSLDMPLPKYDTKRAKME  
QFYFAEEIKNIVSCEGPLRMERHERVDQWRRRMSRAGFQAAPIKMVAQAKQ  
WLLKNKVCEGYTVVEEKGCLVLGWKSRPIVAVSCWKC\*

***Gossipium raimondii***

>Gr Gorai.006G270800

MSHGFLPNEFQKSDKIDEVIGLDLTLSAMGMTFCSHRFMPLIVDNDNNWSR  
RFFEEETRDNKRLKRTINGGNSDGGMSRNGSNGSLSSLHFRDHILTYSKR  
YLAAEAVEEAAAAAAMAAGYEENGIEEDETAYGMRLVQLLIACAEAVACR  
DKSHASALLSELKANALVFGSSFQRVASCFVQGLADRLASVQPPGTAVGRVQ  
LPPVMNIMDIMSDSDKKQEAFLVYEICPHIKFGHFVANLAILEAFEGESLVH  
VVDLGMTLGLPQGHQWRHLIQSLAAIRGGAGKPHCTRLRITAVGLCVDRFD  
VIGKDLKTYAKSMGINLEFNIVESNLENLKPENIKVSDDEVLVVNSILQLHCV  
VKESRGALNSVLQMIHELSPKLLVLVEQDSSHNGPFFLGRFMESLHYYSAIFD  
SLDAMLPKYDTRRAKMEQFYFAEEIKNIVSCEGADRVERHERVDQWRRRMS  
RAGFQATPLRLMSQAKQWLGNNKVCEGYTVVEDKGCLVLGWNAKPIVAVS  
CWKC\*

***Lotus japonicus***

>LjRAD1(chr4.CM1864.540.r2.m)

MSPPLYSVLLEDENSFLLDLSSPMGFHAYPHLPILDSSIANWSLPFSISDET  
FRESKCLKRTMIPISSADFSISSSSSLSVSVNSIPRLNFRDHIRTYKRYLAAEELP  
EDTNSSESVVGAEEDGCADGMRLVQLLIACAEAVACRDKAHASMLLSELKS  
NALVFGSSFQRVASCFVQGLAERLTLIPIGSGAGVSQSMNIMDAASEEME  
EAYRLVYETCPHIQFGHFVANSTILEAFEGESFVHVVDLGMSLGLPHGHQWR  
GLIHLANRASGHGRVRRLRITAIGLCIARLQAIGDELSYANNLGINLEFSVV  
QKNLENLQPEDIKVNDDREALVVNSILQLHCVVKESRGALNSVLQMIHGLSPK  
VLVMVEQDSSHNGPFFLGRFMESLHYYSAIFDSLDMPLPKYDTKRAKMEQF  
YFAEEIKNIVSCEGPLRMERHERVDQWRRRMSRAGFQAAPIKMVAQAKQWL  
LKNKICDGYTVVEEKGCLVLGWKSKPIVAASCWKC

>LjRAM1(chr1.CM1852.30.r2.m)

MINSMCGSSVSLKSENSRNKPQPTSPNESVLQSKKNATQSSADLEQTSNLTP  
PSLNLPAKFDLDGDVEVQSPDSSMWESFFSDHLLDGDFMISSPVRNNVPSPQ  
ASTFNSNYNYAHQGIQSQSLSGCSPPRFSSPLGAFNSNKGKGLSPLHRVFNSPN  
NQYMQHVENLALPAIEEFLEEYQGDHGLGGGGGYSNSSNKVSSDIGSSSECF  
DMQNHIPSMDSLTMQNSSRYCGSVSEDSSVHGGSSQLSQDSDFYHQMGSM  
ASASLSQALQQERYQEKQKQHQTTQQQQPQQQQQNLTVPIPIGMDQEQDS  
GLQLVHLLACAEAVAKEEYMLARRYLHHLNRVVTPLGDSMQRVAACFTES  
LSARLAATLTTKQSISSNGTSMPRSSSSSCLSPFPSNSIEVLKIYQIVYQACPYV

KFAHFTANQAI FEAFEAEERVHVIDLDILQGYQWPTFMQALAAARPGGAPFLRI  
TGVGPCIDSVRETGRCLTELAHSLRIPFEFHPVGEQLEDLKPHMFNRRVGEAL  
AVNTVNRHLHRVPGSHLGNLLSMIRDQAPNIVTLVEQEASHNGPYFLGRFLEA  
LHYYS AIFDSL DATFPESAQRAKVEQYIFAPEIRNIVACEGAERIERHERLEK  
WRKIMEGKGFGRGVALSPNAV TQSRILLGLYSCDGYRLTEDKGCLLLGWQDR  
AIIAASAWRC

> chr3.CM2163.240.r2.m

MIEEEQLSFITL FSSVHSVSFSVSLMKLSFGLGSPYAWLKDMNEEDRGKYLAR  
IINACAMFIESGSIEYADNALEYLAHIASPYGDAMQRVATYVSEGLAFQVLKN  
LKGVPKALS LPKTLSTSEELLVKNLFFQFYFPLKIA YVISSHAIAEAMKGEEVI  
HVIDLSASEAAQWIYLMQRLKEQQKKPLLLKITAIHEKKEVLEQMALHLGVE  
AQKFNHFLQFN AIVSSLENLDLESLPVEKGEPLAISSVLQLHSLLATDDSMSSC  
RNPPSESMNQSTFKEVLGKKKINQSSGSSLLSFPICASSPKMEGFLNGLRKLQP  
RLVVITEQESNVNGSSLTERVDKALDFYGALFKCLESTFLGT AVERIMLERTL  
LGDEIKNIVACEGVERKERHEKLETWIPRLELAGFGRETIRYDWMMQAKKEL  
QGYGNGYKLLQENKCLFVCWNDKPLFSVSAWKVY

> chr3.CM0127.880.r2.m

MEDKGLKLVHLLKDTAVFTESC NFIDADIGLYYISQFATPEGDSMQRVATYFS  
EALACCQVSKNLRGVPKVLSTKLSTPEEQ LVRNFFFELYPFLKIA YKTTNQ  
AII EAMGQEKFINILDLSACDATQWIYLMKSLKEHLPDPPDVKIKVTCIHEKYE  
VLEQMGLHLRLEAERLNFDKFN AVVSTLENLDLEKLPLEKGEPLAISCVLQL  
HSLLATSD EMVRTMNYAPAEASMNQYAQMLGKQNKKNKINSSPDSALSPL  
SLSPPKMECFLNGLWKLQPKVMVITEQE ANVNGSTLTDRMENALQFYGALF  
DCLEATFPRTLVDRTLLEKMLLGKQIKNIIACEGVERKERYEVVRTWIPRLQL  
AGFGMV SISPNGMIAK TLLQNYVGGYHTVQDKNCLFMCWEGRPLFSISAW  
KF

> chr3.CM2163.230.r2.m

MRELRYDSQGLKNPISLLIECAKCVASGSIKNADIGLELISQISSPDGDAVQRM  
VTYFSEALGYRIVKHLPGVYKALNSSKTSSSEDFLVQKYFYELCPFLKFSYLI  
TNQAIVEAMESENWVHIIDLHCSEPAQWVNLLL TLKNRHGGPPHLKITGIHEK  
KEVLDQMSLHLTAEAGNLDFPLQFNPIVSKLEDVDFENLPVKTGEALAITSVL  
QLHSLLATDDDMSGKFSPAGAASMNLR AVHMGQRTFAEWLERDMINAYIL  
SPDSALSPLSFGASPKMGVFLNAMRKLQPKLMVITEQESNLNGSNL MERIDRS  
LYFYSA LFDCLDSTVMRTSVERQKLESMLLGEQIKNIIACEGVDRKERHEKLE  
KWIRRELAGFVKVPLSYNGRIEAKSLLQRYGHKYK FREENDGLLICWSDRP  
LFSVSAWSFRK

>LjNSP1( chr3.CM0416.1260.r2.d)

MTMEPNSTTSDHILDWLEGSVSFFPSFLDEPCNNSGYIQEYHLWDQYQTDAN  
TGSSPNATNSTTATIVATSATSTTSLEPCGSNNNQPLSDLPKKRNATDESSLKP  
PQNKNKRIKTRPMNEPENGD A VRKNKKGGAKANGSNCNSGNSKEGRWAEQ  
LLNPCAAA IAGGNVNRVQHLLYVLHELASPTGDPNHLAAHGLRALTHHLSS  
SSSSPTSSGTITFASTEPRFFQKSLKFYEVS PWFSFPNNIANASILQVLAE EANI  
TSRTLHILDIGVSHGVQWPTLLDALSR RSGGPPSVVRLTVVTAENDQNMPF  
SKAPPGYNYYPRL LGYAQSIKINLQINRIENHSLQTLNAQ SISASPDEILIVCAQ

FRLHHLNHNSPDERSEFLKVLGNMEPRGVILSENTECCCSGCGNFAAGFTRR  
VEYLWRFLDSTSSAFKGRESDERRVMEGEAAKALTNQREMNEEKEKWCGR  
MKEAGFAGEVFGEDAVIDGGRALLRKYDSNWEMKVEEKNTSVGLWWKGQP  
VSFCSLWKLGDNDQGGTS

>LjNSP2( chr1.CM1976.90.r2.m)

MEMDIDCIHHLDFSGHSTLTNTTPSSDNDNYGCSWNHWSPVNVWDAFTGNQD  
DFHHLIDSMIDDNNTGPAFSDHTASTTSEEEEEEEATTTTMTTTTTTTTTTPEA  
ADDDFKGLRLVHLLMAGAEALTGANKNRELARVILVRLKELVSHTDGTNME  
RLAAYFTEALQGLLEGAGGAYNSSSKHHVIGGPHHEPQNDALAAFQLLQDM  
SPYVKFGHFTANQAIVEAVAHERRVHIVDYDIMEGVQWASLMQALASNPNG  
PHLRITALSRSGVGRSMATVQETGRRLTAFATSLGQPFSFHHSRLESDETRP  
AGLKLVRGEALVFNCMLNPLHLTYRSPNSVASFLTAAKALRPRLVTVVEEV  
GSALGGFVERFMDSLHHFSAVFDSLEAGFPMQGRARALVERVFLGPRIVGSL  
ARIYRTGGGGEERGSWREWLRAGFSGVAVSSANHCQSNLLGLFNDGYRV  
EELGSNKLVLHWKTRRLSASLWTCSSSEDCA

> LjT15C06.70.r2.m

MDMEIDIDLLDFYGHSTTPSSDDGGNWVPCSPLDVWDSFTAADHDDFH  
HIIDSFMDYTL PAGDLTPEEESIGERSATTTEEDDEATAADHSGKGLRLVHLL  
MAAAEALTGANKSHDLARAILRLKELVSHTANTNMERLAAYFTDALQGLL  
DGAAGAHNLNKNVAVAGPHREDPQTDMLAAFQLLQDMSPYIKFAHFTANQ  
AILEAVAHERRVHIIDFDVSEGAQWASLIQALSSRKDGPSGPHLRITALSRSCG  
RGGGRRSIATVQETGRRLTAFASVGPFSFHQCRLDPDETFRRTSSLKLRGE  
ALVFNCVLHPLHLNYRAPDSIASFLSGARELSPKLVTLAEEVGPVGDAGFVG  
LFMDSLHRYSAMCDSLEAGFPMQWRARGLVERVFLGPRITSSVARLYRTGEE  
DEEGSGSWGELVASGFRGVPISFTNHCQAKLLLGLFNDGYRVEELSNNKLV  
LSWKSRRLLSASVWTSSDDSNL

> chr5.CM0239.240.r2.m

MQLLGGTLNTSNPPPTTEHEKEDHFSKEQNQQQQQHDHFSFDNLMFQDFYF  
EPALEPKAAFQEPKEQKNRGVLESSQFFGFNKHLVGSNKQVPPSSLASDLLKN  
YGSRFKRPRGQNILSKTKTCASPLKLSTEDILRVAGARFIQHSSSTQWQDNL  
TPMHPYANGFSGFSEEEIKDIELAQLLLAAAERVSCQQFERASFLQNFQNS  
PHHGSAVQRVIFHFAQALQERINKENGTTLKGSDETVKERHLIELLEVDTNITI  
LCHQKMPFYQVMQFAGVQAILENVASGTKIHLININIGCGVMCTGLMQALSE  
RQENPVEILKITAVGVANKTKIEETGKRLMSFAESLNLPFSSYNMIFVTDMMEI  
KVEQFDVEDDEAVAVYSPYFLRSLVSDSDLENLMKVLRKIKPNIMINLGVE  
ANHNSPSFVNRFVEALFYYSAYFDCLDTCMKEEHECRMRIEEMLESEKIRNIVA  
MEDRERTVRSVKIDVWRRFFARYRMVETRLSES AVYQANLVAKKFACGNSC  
TIDKNGKCLLIGWKGTPIHSISAWKFP

> LjSGA.122341.1 partial

QGLDLVHMLLACAEAVGCRDTQQAEEFLLSRIWALASPSGDSLQRVSYCFATG  
LKCRLLLLPQSAIANGTFTRSSMNVPLITRENKLEAFHLLYQTTPIYAFGFMAA  
NEAIFQASKGKSSIHIVDLGMEHTLQWPSLIRALVSRPEGPPKLRITGLIRIEDN  
NPKLQTRINALLEEASSLGMP

> LjSGA.020219.1

MASRVMNSMLGVCSPOLIDHRTIHSALQVFNNMSPFIKFAHFTSNQAILEAVNR  
CGSIHIIDLDIMQGLQWPPFFHILATRIEGPPEVRMTGMGSSMELLVETGKNLT  
NFARRLGISLKFNPVVTKFGVEVDVSILKARPGETLAVHWLQHSLYDATGPDW  
KTLRLLEELEPRIITLVEQDVNHGGAFDRFVGSLSHYYSTLFDSLGLACLHSD  
DRRHSVEHGLLSREINNLAIGGPARSGEDKFRQWRSELARNCCFVQVPM  
NSMAQAQLILNMFSPALGYSLAQVDGTLRLGWKDTSLYTASAWTCGGGAS  
> LjSGA.045015.1 partial

GDTEQLSNESNTFHFESLLSLLNPSVLNLREDEALVINCQNWLRYLSDDDRNS  
NSLRDAFLSLIKGLSPQIVLLVDEDCDLSASSLASRITACFNHLWIPFDALDTFL  
PKDSSQRTEFESDIGQKLINIIGFEGHQRIERLESGVMMSQRMKNAGYFSPFC  
DETVKEVKGLLDEHAGGWGMKRDEGMLVLTWKGNNCVFVTAWVPSGMR  
DHVGMDATL

> LjSGA.073109.1

MKAELKPPTSISFQNPTTTPLFNTPHTSTPLSGALIGCLGSLDGACIEKLLLHCA  
SALESNNITLAQQVMWVLNNVSPQGDNTQRLTAWFLRALISRASICPSVM  
SFKGSNNIPRRSMTVTELTGYVDLIPWHRFGFCASNNEILKAVTGFQRVHVL  
FSITPCMQWPTFIDALAKRPEGPPSLRITVPSFRPQVPPLVNISIHEVGLRLGNF  
AKFRDVPFEFHVIGDENLLPSEQLSNESTRFQFESLLSLLNPSVLNIREDEALVI  
NCQNWLRYLSDDNRNSNSLRDVF\*V\*LKS

> chr3.CM0106.470.r2.d

MDITPYTSKKTHFNHHHEAPIDLHRINHPQHSNPTSTSRSESSETCDDGKW  
ASKLLRECATAISERNSTKTHLLWMLNELSSPYGDPDQKLASYFLQALFCK  
ATDSGFKCYKTLSSVAEKNHSFDSARKLILKFQEVSPWTTFGHVASNGALLE  
ALEGETKIHIVDISNTLCTQWPTLLEALATRNDETPHLKLTVVLLSNKIVGSV  
MKEVGQRMKFAFLMGVPPFEFNVVSGLRSLTKEGLGVQENEIAVNCV  
RRVEVKERESVIGMFKSLSPKVVTVEEGDFVTSRDDFVKNFEECLKFYSLY  
FEMLEESFPPTSNERLMLERECRSRIVRLACNDGDEDGGGGGDQGGDCCCE  
TRERGTQWSERLGSAFSPVGFSDDDVDDVKALLKRYQAGWSLVVPQGN  
NLSGIYLTWKEEPVWASAWKPQLAT

> chr2.CM0018.140.r2.m

MESMLQEEGSSSVTSSPLQFFSMMSLSPSIGSPYPWLRELKSEERGLYLIHLL  
TCANHVAAGSLENANITLQISQLASPDGDTMQRIAA YFTEALADRILKTWPG  
LHRALNSTRIVMVSEEILVQKLFFELFPFLKVA YILTNQAIIEAMEGEK  
MVHIIDLNAEPAQWIALQVLSARPEGTPHLRITGVHQKEILDQMAHKL  
TEEAELDIPFQFNPVLSKLENLDFDKLRVKTGEALAISSIMQLHSL  
LALDDESGRRKSPLLSKHSNGIHLQKVLLMNQNTLGDFLKKDMVNS  
YSPSTDSASSSPVSSTSMNAESFLNALWGLSPKVLVVT  
EQDSNHNGSTLMERLLEALYSYAALFDCLESTV  
SRTSLERIKVEKMLFGEEIKNIIACEGAERKERHEKLDKWLQRLD  
VSGFSNTPLSYYGMLQARRFLQSYGCEGYRMREENG  
SVVMCWQDRSLFSTTAWRPRK

> chr3.CM0460.10.r2.d

MLQSLIPRSPLNSSKPTTMTKRDDGGGGSDSAVDEHSFKRRNFS  
GEKAIEEGEAAHEEDQVLQPASSSGEEESTGLKLLGLLLQCAECV  
AMDNLDFANDLLPEIAELSSPFGTSPERVGAYFAQALQSRV  
VSSCLGTYSPLMAKSVTLTQSQRIFNAFQSYNSV  
SPLVKFSHFTANQAIFQALDGEDRVHIIDLDIMQGLQW  
PGLFHILAS

RARKIRSLRITGFGSSSELLESTGRRLADFASLGLPFEFHPVEGKIGSVTELSQ  
LGVRPGEATVVHWMHHCLYDITGSDLGTLRLLSQLRPKLITTVEQDLSHAGS  
FLARFVEALHYYSALFDALGDGLGADSLERHTVEQQLGCEIRNIVAVGGPK  
RTGEVKVERWGDELKRVGFRPVSRLGNPAAQASLLLGMFPWRGYTLVEENG  
SLKIGWKDLSLLIASAWQPSDLITYHD

> chr5.CM1667.220.r2.a

MREQMLRQDQRRKDENNGLPLIHLLTTATSVDENLDASLENLTDLYQTVS  
LTGDSVQRVVAYFADGLVAKLLTKKSPFYDMVMEEPTSDEEFLAFTDLYRVS  
PYYQFAHFTANQAILEAFEKEEQKNNKSLHVIDFDVSYGFQWPSLIQSLSEKA  
TSNNRISLRITGFGKNMKELQETESRLVSFSKGFHNLVFEFQGLLRGSRVINLR  
KKKNETVAVNLVSYLNTLSCFMKVSDTLGFVHSLNPSIVVLVEQEGGRCSRT  
FLSRFTDSLHYFAAMFDSLDDCLPLESAERLRIEKLLGKEIKSMLNYDVDGV  
GDCPKYERMETWKLRMENHGFGGMKISSKSMIQAKLLLKMRTNYCPLQFEE  
DGGGGGGFRVSRDEGRAISLGWQNRFLLTVSAWQPL

> chr6.CM0139.1440.r2.d partial

LAESLLSCAEKIGYQQYERASKLLSHCKSLTSNRGGPVKRVVHYFAEALQHM  
IDKISMFTGVQAIENVTEAKKIHLIDLEIRKGAQWTTLMHALESRHDCPLELL  
KITAIGSGTTSRHEIEDTGEKLVFAKSLNIPFSFNVVIVSDMVDIITEDVFVIDP  
EETVAVYSQFAIRCKIQEPNQLAIMRMVRTLKPVVMVVAEIEANHNSTSFV  
KRFTEALFYFSAFFDCLEACMKHDEQNRIMIETLLGHGIRSIVAERKSRNVKID  
VWRAYFSRFGMEETELSRVSLYQADLVAKRFPSPGSCCTFHMDGHCLLVGWK  
GTPISSVSVWKFT

> chr4.CM0680.320.r2.m - phase: 0

MNVMDYEQFDCSFTPSFMNQLHECTLENVNANAFPIQEDDLLSPNSILDEMF  
DHDQSENLSPPNTILDEIFDQQSMEELLQQHNQDFDVMNLDLGNELCHGVSQ  
ITQKNVHVSKEADKDSYLNQIQAELMEETSLVDLLLTAEEAVEAQNWYLASE  
IIEKLTNDASSLQNGDSSLNRLALFFAQGLFDKSSSPTPKLQYYCDPVSTQTD  
FCVLQILQELSPYVKFAHFTANQAILEATDGVEDVHIIDFDIMEGIQWPPLMV  
DLAMRKSTSTSLRVTAITVDQQAASAHAQTGRRLEEFAASINFPFTFNQVM  
MVSEEDLQRIELGHSLIVNCMIHQWMPNRSFSLVKTFLDGVTKLSPKLVVLV  
EELFNFSKLKSMSFVEFFCEALHHTAISDSLASGMWGSCHKVEFALIEKQVL  
GLRILDSVRQFPCEREERMLWEEGLFSLKGFKRVGVSNNISQAKFLVSLFGK  
GYWVQFEKCRLLALCWKSRPLTVASIWVPMTNLSDKVK

> chr1.CM0122.2130.r2.d partial

EEENGDELVQFLAAAERVSCQQFERASRLLLHYQWNSSSYASGNTVQRV  
VFHFAEALKERIDRETGRITRVMQFTGVQAMVEHVAGETKIHLLIDLDIKCGVQ  
CIALMQALAERQNSMVKVKFFKISAIGLTACKTKIEDTGKRLASFAESLNLNPF  
YKHILVTDMAEFKDHFEVEEDEAVIIYSAYFLRTMISRPDCLNLMRIIRNIKPS  
IMIVLEVEANHNSPSFGNRFIEAMFYSAFLDCLYTCIEDDECRVFTAILSAGI  
RNIVAMEGRERRVRNVKIDVWRRFFARYRMVEIEFSESSMYQADLVAREFA  
VGKFACTVDKNGRSMIVGWKGTMPMHSISAWRFL

*Lunularia cruciata*

> Lc 6169



MINHPLRKPPKEMEKDEGFKLMHRATPYVAFGHYAANSAILNAFQGEDTLHI  
VDLGMTHGLQWPYLINRLSSREGGPPRLRITGLGLATDMAHETGRELTACA  
KLHRIPFEFRVVAESLENLQPSMLELREGEALAVNSVLQLHCVVKESRGSNT  
VLQHIHELCPRVLTVEQDASHNGPFFLGRFMEALHYYS AIFDSL D ASLPRYS  
HQRVKIEQFHFGEIKNIVSCEGP ARVERHERVDQWRRRMSRAGFQPLPSKFL  
HDARMWLTLYACDGYTLAEEKGCLVLGWRGKSLVAASSWRC\*

> Lc 17330

MAHSPLSWIMKAQLGGLEDDFDSEPTSVLDTQCISPPPLQTDVWAEKQAAM  
LEEQQLLAWQHQQNILYEQQRWEEQQQLCIWEQNESEHGFAELQYLYEHDP  
MNTCNDFSYQSDHCGFQDNQQQGLPFESFDDSQFMLDSWISSSGNHDGLNSI  
VDDSIPSSYQKAFTIPSPADMQVELDSKFQADVSDVRFVKEEDEAKHSMLTN  
LPSNMSNMSNIIPRVNLYQPQDIIDQWYVPSIEDTMCQMOPSVSKLQFQTHPY  
PSPLPGNGNQEALPKSSMDAEPHLP SLNPTLEKSASHKPSAGDESCMSDSLNS  
VAKQIVPATPVPRKATSNNGSNRSVTLAELASGGVKMGGVQLPNVGTQIPSVIR  
LNLETQASGMGGVRMVQLLLACAEAVACRDSRQANILLQQLQHMATPYGD  
AMQRITVCFVEGLTARLAITGSQPFKFRKAQGPRKPPSEREKLFKAFQLVYRAS  
PFLAFGH LAANSAILEAFEKEDRLHIVDLGMSHALQWPYL I HDLANRQGGPP  
RSLRITGFGLSSAQLKEAGEELVEIAKSRNIPFEFRAVTESLESMQPSMLELRE  
GEALAVNSVLQLHCVVKESRGSNAVLKTIHELSPKILTLVEQDASHNGPFFL  
GRFMEALHYYS AIFDSL DVILPRNCPYRVKMEQFHF AEEIKNIVSCEGP ARVE  
RHERVDQWRRKMSRANFQPLPLKFLNQARMWLSHYNCDGYTLSEEKGCLVI  
GWKGPPIAASSWKG\*

***Lupinus angustifolius***

> Lang AOCW01143302.1

FCPARMDQEQGRGGELQGGQESVLDEMIELCSSDAATNAPTCLASSEVDEFVD  
SFINMDQYQYDNEDQVSLEKHQSFDHFLVKDEGDTYAFSKKMMNDALGYV  
ATAMEGEESEIYENITIAMEEGEVEMHCVEEAGLGIDKGLDLVHMLLACAEA  
VSCRDTQQAELLGKISVLATPSGDSLQRVSYFFATGLKCRLLPHNVFANG  
TLTTSTIAMNVPLISREDKLEAFQLLYQATPYMAFGLMASNEAICQASQGKSS  
IHIIDIGLEHTLQWPSLIRALASRPEGPPKLRITGLIANEDNPKLQISINVLVEEA  
RSLGIPLEFHIIEPATTSVLTKEKLNLRGEALFVNSILQLHKYVKESRSYLKTI  
LQSIKKLGPTALIVVEQDTNHNGPFFLGRFLES LHYYS AIFDSL EASMPRKSKD  
RMKIEKLHFAEEILNIVAYEGSDRMERHERVDQWRRKLGRTGFQVMPLKCTS  
QVRMMLSVYDCDGYTL SCEKGTLLLGWKGRPIMMASAWK

***Malus domestica***

> Mdo MDP0000431628

MALSRNFLPEEYMINHERTNKMSVLDLITHSAASAMPCYPYPHTPLLEEGGT  
ASTPPXXDESGNHKRLKRTTSISDSMSSHNSLYSGGGSGDSCITDISLRRSST  
NSLNTLPRLHFRDHIWYTYTQRYLAAEAVEEAAXXMSNAEGNEEEEDXTXXG  
MRLVQLLIACAEAVACRDKSHASALLSELRANALVFGSSFQRVASCFVQGLA  
NRLALVQPLGAVGFIGSAMSTKDFALDKKEEALRLVYEICPHIQFGHFVANSS  
ILEAFEGESFVHVVDLGMTLGLPHGDQWXGLIESLATRTGQPPTRLRITGVGL  
YGDRLQIIGEELEAYADSLGINLEFSVVXSNLENLRPXDIKMYDGEVLVNSIL  
QLHCVVKESRGALNSVLQMVHELSPKILVLVEQDSSHNGPFFLGRFMEALHY

YSAIFDSL D A M L P K Y D T R R A K M E Q F Y F A E E I K N I I S C E G R Q G G E A R E V D Q W R  
R R M S R A G F Q A A P I K M L A Q A K Q W L G K I K V C E G Y T I L E E K G C L V L G W K S K P I V  
A A S C W K C \*

> Mdo MDP0000464809

M P P L S L K L H S L F F K Y H L R H Q L H N L T Q S A Q L Q N T D P K F G I T S R P E E P V V P A N P T  
F Q N G V A T K N I H I D P N S S L S L R I F L P D T V L P L K A P N P T S R V G A L L S P S P X C S N S D D  
G V V Y R G Y S P D Q L V G R R H R K V P I F L Q F H G G G F V S G S N D T S W N D A F C R R M A K L  
C D A I V V A V G Y R L A P E S P Y P A A F E D G V T V L K W V A K Q A N L A L V Q K G R S R I F D S F  
G S S M V E P W L A A H G D P S R C V L L G V S C G A N L A D Y V A R K A V E A G D L L D P I K V V A  
Q V L M Y P F F I G S T P T R S E I K L A N S Y L F D K A T C M L A W K L F Q T E E E F D L D H P A G N P  
L M P A G R G P P L K T M P P T L T V V A Q H D W M R D R G I A Y S E E L R K A N V D A P L L D Y K D  
T V H E F A T L D V L L E T P Q A K A C A E D I T I W Y K K E A S T Y T S H I S H I V Y I S P Q G D S I G Q  
A S N T L E S Y T M A S D L Y V Q P E F C G E I T S N E V I G F D L N L S S M S C L P H P S L S A L E D D S  
A N W V S P F V D K T R N H K R L K Q E H D A N Y G F K V G T N Y S S F Y T G S D S N M C T S G F T S  
L P T I Q F R D H I S A H K R R Y L A A E A M E E A F A T L M R D K E D E S E E G G G S E D E I K L V Q Q  
L I A C A E A V A C R D K A H A S A L L F E L R A N A Q A F G T S F Q R V S S C F V Q G L A X R L A L V  
Q P L G A G G V I D P N V K S K P F S A E K G P F S A E K D E A L H L V Y E I C P Q I Q F G H F V A N A S I  
L E A F E G G S S V H I D L G M T L G L Q H G Y Q W R D L I D R L A N R P G Q P L H X L R I T G V G S  
S S E R L Q A I G D D L K L H A Q S M K I N X D F S E V E S N L E N L K P Q D F H L V D G E I L I N S I L Q  
L H C L V K E S R G T L N S A L Q T L H E L S P K L M V L V E Q D T S H N G P P F L G R F M E A L H N Y  
S A I F D S L D A M L P K Y D T R R V K M E Q F Y F G E E I K N I V S C E G P A R V E R H E R V D Q W R  
R R M R R A G F Q P A P L R T M A Q A V K W L E T N A C E G Y T V V E D K G C L V L G W K S K P I I A  
T S C W K \*

***Manihot esculenta***

> Me cassava4.1\_032725m.g

M S P V P Y M Q S E F C S D N K S Y E T T F L D L S P F C S V P N F S A V E N D S P A W F D L D E T R S H  
K R I K Q E P C S R T R A N S L N S V P K L H F R D Y I W A Y T E R Y L A I E A M E E A A A A M T V G E  
R N E V K D E E G S D G M K L V Q Q L I A C A E A V A C R D K K H A S A L L A E L R A N A L V F G T S  
F Q R V A S C F V Q G L S D R L A L L Q P L G T V G V L A P Q A N S V N T F K A E K D E A L R L V Y D I  
C P Q I Q F G H F V A N A S I L E A F E G E S S V H I V D L G M T F G L P H G L Q W L N L I H S L A K H P  
G Q Q P H R L R I T G V G N S A E L L Q A I G D E L D C Y A R S L G L N F E F L W V E S T L E N L K P E H  
F K L L A G E V V I N S I L Q L H C V V K E S R G A L N S F L Q I L H E L S P K L L I L V E Q D S N H N G P  
F F L G R F M E A L H Y Y S A I F D S L D A M L P K Y D T R R A K I E Q F F F A E E I K N I I S C E G P A R  
V E R H E R L D Q W R R R M S R A G F Q P S P I K T I M Q A K Q W L E K A N F C E G Y A V T E E K S C  
L V L G W K S K P I I A A S C W K C P \*

> Me cassava4.1\_031685m.g

M A P S L F S C D F S E N E T M G S I S S L D L S L S A M A Y Y P Y L Y L P T L E N N A S I C I L P F S E D I  
R E H K R I K R T L S S A E S L G S N N N G F Y C A G S G N S D C S S I S R S N S S N S L N S L P R L H F R  
D H I R T Y T Q R Y L A A E A I E E A T E A M E N T D E G G D E E D G S T D G M R L V Q L L I A C A E A  
V A C R D K S H A S T L L S E L R R N A L V F G S S F Q R V A S C F V Q G L A D R L S L V Q P L G T V G  
F T A S M M N I M D I S S D K K E E A L S L V Y E I C P H I Q F G H F V A N S S I L E A F E G E S F V H V V  
D L G M T L G L P H G H Q W R Q L I Q S L A S R A G K P P R R L R I T G V G L C V G R F Q T I G D E L V  
E Y A K E L G I N L E F S V V E S N L E N L R R D D I K V F D G E V L V V N S I L Q L H C V V K E S R G A  
L N S V L Q I I H A L S P K V L V L V E Q D S S H N G P P F L G R F M E A L H Y Y S A I F D S L D T M L P R

YDTRRAKMEQFYFAEEIKNIVSCEGPARRVERHEKMDQWRRRMSRAGFQAAP  
IKMMAQAKLWLAKNKVCEGYTVAEEKGCLVLGWKSKPIIAASCWKC\*

***Medicago truncatula***

> MtDELLA1

MKREHQESFGGGVISNNKTNNTNHLNSSKNINFGECSSMQNTNTKQNMWRE  
EKETNGGGMDELLAALGYKVRSSDMADVAQKLEQLEMVMGSAQEEGINHL  
SSDTVHYDPTDLYSWVQTMLTELNPDSQINDPLASLGSSSEILNNTFNDDSE  
YDLSAIPGMAAYPPQEENTAARKMKTWSEPESEPAVVMSPPPAVENTRPVVL  
VDTQETGVRLVHTLMACAEAIQQKNLKLAEALVKHISLLASLQTGAMRKVA  
SYFAQALARRIYGNPEETIDSSFSEILMHMFYESSPYLKF AHFTANQAILEAFA  
GAGRVIDFGLKQGMQWPALMQALALRPGGPPTFRLTGIGPPQADNTDAL  
QQVGWKL AQLAQTIGVQFEFRGFVCNSIADLDPNMLEIRPGEAVAVNSVFEL  
HTMLARPGSVEKVLNTVKKINPKIVTIVEQEANHNGPVFVDRFTEALHYYSSL  
FDSLEGSNSSNSNSNSTGLGSPSQDLLMSEIYLGKQICNVVAYEGVDRVER  
HETLTQWRSRMGSAGFEPVHLGSAFKQASTLLALFAGGDGYRVEENNGCL  
MLGWHTRS LIATSAWKLPQNESK

>MtDELLA2

MKREHKL EHEDMSSGSGKSGVCWEDDGGGMDELLA VVGKVKSSDMAEV  
AQKLEQLEQAMMGNNFHDHDESTIAQHLSNDTVHYNPSDISNWLQTMLSNF  
DPQPNNPSVNSDDNDLNAIPGKAIYAADEFTSRKRVRKRNESVTVTTESTTTRPI  
MVVETQEK GIRLVHSMACAEAVEQNNLKMAEALVKQIGYLAVSQEGAMRK  
VATYFAEGLARRIYGVFPQHSVSDSLQIHFYETCPNLKFAHFTANQAILEAFQ  
GKSSVHVIDFSINQGMQWPALMQALALRPGGPPAFRLTGIGPPASDNSDHLQ  
QVGWRLAQFAQTIHVQFEYRGFVANSLADLDASMLELRSPETESVAVNSVFE  
LHKLNARPGALEKVFSVIRQIRPEIVTVVEQEANHNGPAFLDRFTESLHYYSTL  
FDSLEGSSVEPQDKAMSEVYLGKQICNVVACEGTDRVERHETLNQWRNRFN  
SAGFSPVHLGSAFKQASMLLALFAGGDGYKVEENDGCLMLGWHTRPLIAT  
SAWKLA AANSVVVSH

> MtNSP1

MTMEPNPTSDHILDWLEGSVSFFPSFLDDPYNNGYIHEYEIWNQNQDISNQYQ  
IDANTNSSNATNSTTNIVAASSTTTSTTSLEPNSFNIPFSDLPKRNAEDEL  
SLK KQPQNQKNKRLKSRPMNESDNGDAALEGTVVRKSGGNKKGA AKANGSNSN  
NGNNDGRWAEQLLNPCAVAITGGNLNRVQHLLYVLHELASTTG DANHRL  
AAHGLRALTHHLSSSSSTPSGTITFASTEPRFFQKSLLKFYEFSPWFSFPNNIA  
NASILQVLAEEPNNLRTLHILDIGVSHGVQWPFTLEALSRRPGGPPPLVRLTVV  
NASSSTENDQNMETPFSIGPCGDTFSSGLLGYAQLSNVNLQIKKLDNHPLQTL  
NAKSVDTSSDET LIVCAQFRLHHLNHNPNPDERSEFLKVL RGMPEPKGVILSENN  
MECCSSCGDFATGFSRRVEYLWRFLDSTSSAFKNRDS DERKMMEGEAAKA  
LTNQREMNERREKWCERMKEAGFAGEVFGEDAIDGGRALLRKYDNNWEM  
KVEENSTSVELWWKSQPVSFCSLWKLDKQPE

> MtRAM1

MINSLCGSSNSLKEKCLQPNSSNQTNTHSKKNATNSCGDLEQINVLTQP  
SLNL PSLKFDLDGDVEVQSPDSSMWEAFFNDHLDNDFMISSPIRNINPNSPQASTYN  
NCNYNYAQGMQIQSLSGCSPPRFASQIGSLNSNNQKQKGLSPLHRVFN  
SPN

NQYMQHVENLSLPAIEEFLEDFQGDVDHFSSTKVSSECFDMETPISTILDSLTM  
QNSSSYGASVNEESTLLHGGNSSSQISQESDIYHQMGSMASASLSQALQQERY  
QEKHQKMQAQQQSLTVPIQIGIEQEQDSGLQLVHLLACAEAVAKGEYMLA  
RRYLHQLNRVVTPLGDSMQRVASCFTESLSARLAATLTTKSSSTKKLAPSSLS  
SSSSSSCLSTFPSNPMEVLKIYQIVYQACPYIKFAHFTANQAIFFAEAEERVHV  
IDLDILQGYQWPAFMQALAAARPGGAPFLRITGVGPCIESVRETGRCLTELAHS  
LRIPFEFHPVGEQLEDLKPHMFNRRVGEALAVNTVNRLHRVPGNHLGNLLSM  
IRDQAPNIVTLVEQEASHNGPYFLGRFLEALHYYS AIFDSLDA TFPVESAPRAK  
VEQYIFAPEIRNIVACEGEERIERHERLEKWRKIMEGKGFKGVPLSPNAV TQSR  
ILLGLYSCDGYRLTEDKGC LLLGWQDRAIIAASAWRC

> MtNSP2

MDLMDMDAINDLHFSGHSSLTNTPTSDEDYGCTWNHWSPIVNWD TFTGAPD  
DFHHLMDTHIEDRTTVLEQLSPSITTTTTTTTTTDEEEEEEMETTTTTTTT AIKTH  
EVGDDSKGLKLVHLLMAGAEAL TGSTKNRDLARVILIRL KELVSQHANGSN  
MERLAAHFTEALHGLLEGAGGAHNNHHHHNNNKHYLTTNGPHDNQNDTLA  
AFQLLQDMSPYVKFGHFTANQAIIEAVAHERRVHVIDYDIMEGVQWASLIQS  
LASNNNGPHLRITALSRTGTGRRSIATVQETGRRLTSFAASLGQPF SFHHCRLD  
SDETFRPSALKLV RGEALVFN CMLNLP HLSYRAPESVASFLNGAKTLNPKLVT  
LVEEEVGSVIGGFVERFMDSLHHYSAV FDSLEAGFPMQNRARTLVERVFFGP  
RIAGSLGRIYRTGGEEERSWGEWLGEVGF RGVVVSFANHCQAKLLLGLFND  
GYRVEEVGVGSNKL VLDWKSRRLLSASLWTCSSSDSDL

> Mt Medtr4g104020.1

MSPALYASTFKCEVDENPSLMGSYYASLYPNLPILENSATSTWILNPFSDHETE  
TIRDHKKLKRSTVTIPIWFANFSSHSNSFFNNINSNNNSVNSIPRLHFRDHIRTY  
KQRYFASEAVEEAAEDNFNYNNCEAEEDGSCADGMRLVQLLIACAEAVACR  
DKSHASVLLSELKSNALVFGSS FQRVASC FVQGLTERLTLIQPIGNNSAGSDTK  
SMMNIMDAASEEMEEAFKLVYENCPHIQFGHFVANSIILEAFEGESFLHVVDL  
GMSLGLPHGHQWRGLIQSLADRSSHVRRLRITAIGLCIARIQVIGEELSIYAK  
NLGIHLEFSIVEKNLENL KPKDIKVNEKEVLVVNSILQLHCVVKESRGALNAV  
LQMIHGLSPKVLVMAEQDSGHNGPFFLGRFMESLHYYS AIFDSLDA MLPKYD  
TKRAKMEQFYFAEEIKNIVSCEGPLRMERHEKVDQWRRRMSRAGFQGSPIK  
MVVQAKQWLVKNNVCDGYTVVEEKGC LVLGWKSKPIVAVSCWKC\*

***Mimulus guttatus***

> Mgu mgv1a021462m.g

DDENAPIWL PPLYDESSNFKRIKRTVSLGAFTSSNSSSSNVSSHIPRTSSTSSLSS  
VPKLQFRDHIMTYTRRYLTVEEEEEEGASVADLVGSEGGQGGGVAGEGNA  
DGMKLVQLLISCAEAVACRDKSHASVLLSELRSNALVFGSAFQRVASC FMQG  
LADRLALVQPLGAVGYVVVPPRTTTTTTSVASEKREEALRLVYENCPHIQFGH  
FVANSIILEAFEGERLVHVVDLGMTLGLPHGHQWRGLV RSLADRPGPPRLRI  
TAVGLCGDEFRAIGDELEAYAVGLGLNLEFSVVESNLENLDHKDIDVRPGEV  
LVVNSILQLHCVVKESRGALNSVLRVIHGLSPRVLALVEQDSSHNGPFFLGRF  
MEALHYYS AIFDSLDA VLPKYDTKRAKMEQFYFAEEIKNIVSCEGPARVERH  
ERVDQWRRRMSRAGFQPSPLKMLAQAKQWLSSINACEGYTIVEEKGC LVLG  
WKS KPIVAASCWKC\*

***Oryza sativa***

> OsDIP1

METMSYPCSLIPFSTQFEEISSSSLLLWSPQAEENPHENANMYEFDADHSHD  
QIHQDHFQFLDMMVIQESANEFDGNHSHDQIHQDHEFLETMVIQESANEFDGD  
HSHDQIHQDHEFLEMMAIQESANDLLQLQDDFSVPNADPLAASFEDERLAV  
AGHENGNVVATQEEASAGDLLLAGAMAVDAGDAVHASAIMSRLDDLLADIA  
GRRSCEATSPVDHLAYYFARGLKLRISSGAATPASSPPPPAANWSSPAYRMLQE  
LTPFVKFAHFTANQAILEATADDLDVHVVDVFNVGEGVQWSSLMLKLLLLGTI  
TILQPKLVILIEDELSRISKNPSPSLAAPPPFPEFFSDAVAHFTAVMESTASCLV  
SYDDEAWLSLRRVGEVVGPRVEDAVGRYGLAGGAQMMEGLRAREVSGF  
SVAQGKMLAGLFGGGFGVVHQEKGRALALCWKSRPLISVSLWCPK

> Os LOC\_Os01g67650

MGMSPEPCNSISDCSQQQSHHLTLTQQQDSTICTNQELDYRFRFYDVDEAAF  
DGNEVELVSRFSKVTRMDHMISSPYQPTWSPAQAQAVDVGSSSETSRVRKKRF  
WDVLECKKQKVEAMEAMDTPATATFRVAGDGGGGGGGGGAGGGGGGADG  
MRLVQLLVACAEAVACRDRAQAAALLRELQAGAPVHGTAQFQRVASCFVQG  
LADRLPLAHPALGPASMAFCIPPSSCAGRDGARGEALALAYELCPYLRFHF  
VANACMLEAFEGESNVHVVDLGMTLGLDRGHQWRGLLDGLAARASGKPAR  
VRVTGVGARMDTMRAIGRELEAYAEGGLMYLEFRGINRGLES LHIDDLGVD  
ADEAVAINSVLELHSVVKESRGALNSVLQTIKLSPRAFVLVEQDAGHNGPFF  
LGRFMEALHYAALFDALDAALPRYDARRARVEQFHFGAEIRNVGCEGAA  
RVERHERADQWRRRMSRAGFQSVPIKMAAKAREWLDENAGGGGYTVAAEK  
GCLVLGWKGPVIAASCWKC\*

***Phaseolus vulgaris***

> Pv Phvul.003G208600

MAPTHCSPFNGEIDGENLSHVFDIWA TDHYPYFPHQPISKSSSSTLVLPFCDGT  
IRDNRKRVKRTVGIPIFDWIENLIGNSHSFLNTSANNISNRNRDSIPKLHFRDHIRT  
YTQRYLAAEPEEEAPEDTNSSEGGGVEEDGCHDGVRLVQLLIACAEAVACRD  
KSHASILLSELARNALVFGSSFQRVASCFVQGLTERLNLIQPTGPVSPMPAMM  
NIMDTASEEMEEAFRLVYELCPHIQFGHFVTNSIVLEAFVGESFVHVVDLGMT  
LGLRHGHQWRGLMQSLANRKADERVRLRITAVGLCDRLQSIGDELSVYAT  
NLGINFEFSVVKKNLENLEPEDIEVREEEVLAVNSILQLHCVVKESRGALNSV  
LQMVHGLGPKVLVMMEQDSSHNGPFFLGRFMESLHYSAIFDSLDMPLPKY  
DTKRAKMEQFYFAEEIKNIVSREGPLRMERHERVDQWRRRMSRAGFQAAPIK  
MVAQAKQWLQNSKVCEGYTVVEEKGCLVLGWKSKPIVAVSCWKC\*

***Populus trichocarpa***

> Pt Potri.015G091200.1

MAHSFLSGEFNDENVSETSGLDLSLSAMACYPRPPYLPTFDSNAVSWILPFS  
DTRDAKRMRRSSSLVESIRSNNSSLYSGGSSICRSISTNILNSIPKLHFRDHIWT  
YTQRYLAAEAVEEAASEAMINADEGGNEEEGNADGMRLVQLLIACAEAVAC  
RDKSHASALLSELRSNALVFGSSFQRVASCFVQGLTDRLSLVQPLGAVGFVPT  
MNIMDIASDKKEEALRLVYEICPHIRFGHFVANNAILEAFEGESFVHVVDLGM  
TLGLSHGHQWRRLIESLAERAGKAPSRRLRITGVGLCVDRFRIIGDELKEYAKD  
MGINLEFSAVESNLENLRPEDIKINEGEVLVNSILQLHCVVKESRGALNSVL

QIVHELSPKVLVLEQDSSHNGPFFLGRFMEALHYYS AIFDSL DAMPLPKYDTR  
RAKMEQFYFAEEIKNIVSCEGP ARVERHERVYQWRRRMSRAGFQA APIKMM  
AQAKQWL VKNK VCDGYTVVEEKGCLVLGWKSKPIIAASCWKCLINSSQ\*

> Pt Potri.012G093900.1

MAHSFLSREFNDETLSETSGLDLSLAAMACYPHPYLP IFESNVVSRMLPFSDE  
TRDVKRIKQSSSMVESIRSNGSSLYSGGSSICRSSSTNSLNNIPKLHFRDHIWY  
TQRYLAAEAVEEAAAAMINAE EGGNEEEGNSDGMRLVQLLIACAEAVACRD  
KSHASALLSELRSNALVFGSAFQRVASC FVQGLIDRLSLVQPLGAVGFVAPTM  
NIIDIASDKKEEALRLVYEICPHIRFGHFVANNSILEAFEGESSVHVVDLGMTL  
GLPHGHQWRLLIQSLAERAGKPPSRLRITGVGLCVDRFRIIGDELEEYAKDMG  
INLEFSVVKSSLENLRPEDIKTSEDEVLVVNSILQLHCVVKESRGALNSVLQIIL  
ELSPKVLVLEQDSSHNGPFFLGRFMEALHYYS AIFDSLDTMLPKYDTRRAK  
MEQFYFAEEIKNIVSCEGP ARVERHERVDQWRRRMSRAGFQVAPIKMMMAQA  
KQWL VQSKVCDGYTVVEEKGCLVLGWKSKPIIAASCWK C\*

*Prunus persica*

> Ppe ppa016418m.g

MSAFDLISHSAMSCYSNPYMP LLEEGNASALTFPYLDESGN HKRLKRTISIAES  
MSSHNSLYGGGSNNSCVTNGSISRSGSTNSLNTLPRLHFRDHIWY TQRYLAA  
EAVEEAAAAMINAE GNGAEEDGTADGMRLVQLLIACAEAVACRD KSHASAL  
LSELRANALVFGSS FQRVASC FVQGLANRLALVQPLGAVGFIGSPMNAK DFA  
LDKKEEALRLVYEICPHIQFGHFVANSSILEAFEGESYVHVVDLGMTLGLPHG  
DQWRGLIESLATRAGQPPSRLRITGVGLYGDRMQIIGDELEAYADRLGINLEF  
SVVESNLENLRPEDIKLLDGEVLVVNSILQLHCVVKESRGALNSVLQM VHEL  
PKILVLEQDSSHNGPFFLGRFMEALHYYS AIFDSL DAMPLPKYDTRRAKMEQ  
FYFAEEIKNIISCEGP ARVERHERVDQWRRRMSRAGFQA APIKMLVNAKQWL  
GKINVCEGYTILEEKGCLVLGWKSKPIVAASCWK C\*

> Ppe ppa026722m.g

MASGLYVQAEFSGDNTSDEVIGLDLNLSSMA CLPYPSSLSTLEENPAAWVIPFI  
DETSSHKRLKQQHSSSYEFN NAGTNYCSLYSGSGSMCARGLDSL PRIHFRDHI  
SAYTRRYLAVEAMEEATATLMRGKEGESEEGGRGDATKLVQQLIACAEAVA  
CRDKAHASTLLYELRANAKVFGTSFQRVASC FVQGLSDRLALIQLGAVGLI  
GPITKSTAFSAEKDEALHLVYEICPQIQFGHFVANASILEAFEGESSVHVIDLG  
MTLGLPHGYQWRNLIDSLANRAGQPLHRLRITGVGNSAERLQAIGNDLKLHA  
QSMKLNFEFSAVESSFENLKPQDFNLVDGDVLVVNSILQLHCLVKESRGALN  
SVLQTLHQLSPKLMILVEQDTSHNGPFFLGRFMEALHNYS AIFDSL DAMPLPKY  
DTRRAKMEQFYFGEEIKNIVSCEGP ARVERHERVEQWRRRMRRAGFQPAPLK  
MIAQAMKWLEINTCEGYTVVEDKGCLVFGWKSKPIIATSCWK C\*

*Ricinus communis*

> Rc 29929.t000249

MPSALYMQSESFRDYTRYETTGLDLNIGYSIPHIPVSKNSRPTCFDLDETRSHK  
RVKPGGVESIGNGIGCYAVSSNGGSINANCLNSLPRLHFRDYIRAYTERYLAIE  
AMEEAAAGLMISKKNEIKEEDIDGMKLVQQLIACAEAVACRD KTHASALLSE  
LRANALVFGTSFQRVASC FVQGLSDRLTLLQPLGAVGVLPAGKTISFTA EKD  
EALRLVYEICPQIQFGYFVANATILEAFEGESSIHVVVDLGMTLGLPHGEQWRN

LLHCLANRPDKKPRCLRITGVGNSAERLQALGDELDCYARSLGLNFEFLWVE  
SSLEKLGKSTDFKLLDGEVVIINSILQLHCAVKESRGALNTVLQILHELSPKLLIL  
VEQDSGHNGPFFLGRVMEALHYYS AIFDSLDTMLPKYDTKRVKIEQFFYGEI  
KNIVSCEGP ARVERHERVDQWRRRMSRAGFQPAQIKMAMQAKQWL GKAKV  
CEGYTVTEDKGCLILGWKSKPIAASCWKCC

> Rc 30147.t000065

MRRRLFPNDLSHDETINETSSLDISLSAMAYYPYPYLPILNENESIFVLDFSDET  
REHKKRIKRALSFAESTGSDGIYNTGGSGSGSNDTISRSCSTNSLNSLPRHLH  
FRDHIWTYTQRYLAAEA VEEGAEAMANSEEGENHGEGGNTDGMRLVQLLIA  
CAEAVACRDKSHASALLSELRSSALVFGSSFQRVASCFQGLADRLSLVQPLG  
TVSLVTPIMNIMDIASDKKEEALSLVYEICPHIQFGHFVANSSILEAFEGESFVH  
VVDLGMTLGLPHGHQWRQLIQSLANRAGKPPCRLRITAVGLCVGRFQTIGDE  
LVEYAKDVGINLEFSVVESTLENLQPDDIKVFDGEVLVNSILQLHCVVKESR  
GALNSVLQTIHALSPKILALVEQDSSHNGPFFLGRFM EALHYYS AIFDSL DAM  
LPRYDTRRAKMEQFYFAEEIKNIVSCEGP ARVERHEKVDQWRRRMSRAGFQ  
AAPVKMMAQAKQWL GKKNKVC DGYTVVEEKGCLVLGWKSKPIVAASCWKCC

*Selaginella moellendorffii*

>Sm 88990

GLQLIHMLLGCGEKIDQEDYIYAGNLLHQLKQLASPTGDSIHRVATHFTDALY  
ARLNGTGYRSY TALRAYDPASLEEILGAYHILYQVCPYIKFAHFTSNQAI FEA  
EGEQSVHIIDLEILQGYQWPAFMQALAA RQGGAPHLRITGVGM PLEAVQETG  
KRLADLAATLRVPFEYHAVGERLEDLQSHMLHRRHGEALAVNCIDRFHRLFT  
DDHLVVNPVVRILSMIREQAPRIVTLVEQE ANHNTNSFLKRFLEAMHYYS AIF  
DSLEATLPQVSPERAKVEQVVSSEIMNIVACEGSQRIVRHEKVDKWCKIMES  
IGFYNVALSPSAVHQSKLLLRLYQTDGYTLVEDKGCLLLGWQDRAIIGASAW  
RC\*

> Sm 83811

MCSNDVFNVPQREDVLQDKIELKESISALES DGA VGLEFWRGLQHQQEQQEQ  
QEQQQRHAQDQSLFEQEQQQGSRAQPA AAQDHHESGDANVGIRLIQLLLA  
CAEAVACRDVNQAATLLSQLQQMASPRGDSMQRVTSCFVEGLTARLAGLQS  
ISLSGAA YKPAVAPPAARRSQIPEALRDEGFNLVYEFCPYFSFGHFAANAAILD  
AFEGESRVHIVDLGMSSALQWPALLQGLASRPGGPPESIRITGVSCDRSDKLFL  
AGEELSRLAESLELQFEFRAVTQAVESLQRGMLDVRDGEAMAINSAFQLHCV  
VKESRRSLKSVLQSIHELSPKILTLVEQDACHNGPFFLGRFIEALHYYS AIFDA  
VDAILPSDSEERLKIEQYHYAEEIKNIVACEGPDRVERHERADQWRRRMSRA  
GFQPKPLKFLGEVKTWLGMYYPSEGYTLVEEKGCIVLGWKGKPIVAASTWR  
C\*

*Setaria italica*

> Sit Si000959m.g

MGMPEQPCRSTPN SFTTSFGSSQQMHHL PQHDAALCTEPGLGFPY YYGTDQQ  
DAAFDGDEVDLGFRAK VTKVDY YSSPYQPSWPLARADVAAAAAESSRVRK  
QRFRDVLESCKQKVEAMEAMESPVAFQEGEDGGVAGDGGGAAAGGGGGG  
GGGGGGADGMRLVQLLVACAEAVACRDRAQAAALLRELQV GAVHGTAF  
QRVASCFVQGLADRLALAHPPALGPASMAFCIPPS CAGRDGARGEALALAYE

LCPYLRF AHFVANASILEAFEGESNVHVVDLGMTLGLDRGHQWRGLLDGLA  
ARAGAKPKRVRVTGVGAPLDTMRAVGRELEAYA EGLGMRLEFRAVDRSLES  
LHADDLGVA ADEAVA ISSVLELHCVVKESRGALNSVLQTVRKLS PRAFLVE  
QDAGHNGPFFLGRFMEALHYAAVFDALDAALPRYDARRARVEQFHFGAEI  
RNVVGCEGVARVERHERADQWRRRMSRAGFQSVPIRMAARAREWLEENAG  
GGGYTVAEEKGCLVLGWK GKPLIAASCWKC\*

***Solanum lycopersicum***

> Sly Solyc03g110950.1

MIHDMANVFLSLEPCNGDQIGYDPMENSLYLTHHKELSYSLNPYTSVLKRNA  
PTNNMISSLSNDSASFKRLRRTPSLGESFGSNSTTFYSTESSSTGGSLPRIGSSNS  
VNSLSLQPGIHF RDHVWALNQRYLAAEAFEEAAADIINQEEENGEGMKLVQL  
LITCAEAVACRDKSRASVLLSELRASALVFGT SFQRVASC FMQGLSDRLALV  
QPLGT VGYVATPAMNKTDIALEKKEEALRLLYEICPHIQFGHFVANCLILEAF  
EGESFIHVVDLGM SLGLPHGHQWRRLVQSLVNRPGQPPRRLRITAVGQNI EK  
LQIIGDELEDYARSLGINLEFS AVESNLENLKP KDIKVYDGEVLVNSILQLHC  
VVKESRGALNSVLQVVHELSPKILVLVEQDSSHNGPFFLGRFMEALHYSAIF  
DSLDMVLPKYDTRRAKIEQFYFAEEIKNIVSCEGP ARVERHERVDQWRRRMS  
RAGFQA APIKMVSQAKQWLAKVNGHEGFTITEEKGCLVLGWKSKPIVAASC  
WKC\*

***Solanum tuberosum***

>Stu PGSC0003DMP400026755

MIHNMANVFLSLEPCNGDQIGYDPMENGLYLSHHKDL SYSLNPYTSVLKRNA  
PTNSMIISTLSNDSGSFKRLRRTPSLGESFGSNSTFYSTDSSSGSSNCSLPRIGS  
TNSVNSLSLQPGIHF RDHVWALNQRYLAAEAIEEAAADIINQEEENGEGMKL  
VQLLITCAEAVACRDKSRASVLLSELRASALVFGT SFQRVASC FMQGLADRL  
ALVQPLGT VGYVATPAMNKTDIALEKKEEALRLLYETCPHIQFGHFVANCSIL  
EAFEGESFIHVVDLGM SLGLPHGHQWRRLIQSLVNRPGQLPHRLRITAVGQNI  
EKLQIIGDELEDYARSLGINLEFS AVESNLENLKP KDIKVYDGEILVNSILQLH  
CVVKESRGALNSVLQVVHELSPKILVLVEQDSSHNGPFFLGRFMEALHYSAI  
FDSLDMVLPKYDTRRAKIEQFYFAEEIKNIVSCEGP ARVERHERVDQWRRRM  
SRAGFQA APIKMVSQAKQWLAKVNGHEGFTITEEKGCLVLGWKSKPIVAAS  
CWKC\*

***Sorghum bicolor***

>Sb Sb03g043030

MGTSEQPCTSNLFTASSYGTSQQIHLLPQHDSVICTEPGMGFPYYYGTDQQD  
AAFDGDEVELGFQASKATRVDYYSSPYQPSWPLARAAATESSRVRKQRFRD  
VLESCKQKVEAMEAMESPVAFQEGEDGLAVGDGGGAGAAAGGGAGAGGG  
NGGGADGMRLVQLLVACAEAVACRDRAQAAALLRELQAGAPVHGTA FQRV  
ASCFVQGLADRLALAHPPALGPASMAFCIPPSCTGRDGARGEALALAYELCP  
YLRFAHFVANASILEAFEGESNVHVLDLGMTLGLDRAHQWRGLLDGLAARA  
GAKPARVRVTAVGAPAETMRAVGRELEAYA EGLGLCLEFRAIDRSLES LHM  
DDLGLIA ADEAVA ISSILELHCVVKESRGALNSVLQTIRKLS PKAFVLVEQDAG  
HNGPFFLGRFMEALHYAAVFDALDAALPRYDARRARVEQFHFGAEIRNVV



GCEGAARVERHERADQWRRRMSRAGFQSVPIRMAARAREWLEENAGGGGY  
TVAEEKGCLVLGWKGPVIAASCWKS\*

***Theobroma cacao***

> Tc Thecc1EG014574

MGHGFLANEFQKTDRIDEVIGLDLELSAMAFQYQPFMPIMGDNACGWSLPFS  
GEIRDTKRLRRTISIPESIGSSGSLSSGGNSDSSLSRSGSTSSLNSFSRLHFRDHV  
LTYNQRYLAAEAVEEAAAAMISSEESGGEEDETADGMRLVQLLIACAEAVA  
CRDKSHASALLSELRANALVFGSSFQRVASCVFVQGLADRLALVQPLGTVGLV  
APVMNIMDISSDKKEEALRLVYEICPHIQFGHFVANSSILEAFEGESFVHVVDL  
GMTLGLPHGHQWRHLIQSLANRAGKAPSRRLRITAVGLSDHRFHIIQGELEAY  
AKDLGMNLEFSVVKSNLENLRPEDIKVFDGEVLVNSILQLHCVVKESRGAL  
NSVLQMIHELSPKVLVLVEQDSSHNGPFFLGRFMEALHYYS AIFDSL DAMPLPK  
YDTRRAKMEQFYFAEEIKNIVSCEGPGRVERHERVDQWRRRMSRAGFQAAP  
LRMMTQAKQWLKGNKVCEGYTVVEDKGCLVLGWKSKPIVAASCWKC\*

***Vitis vinifera***

> Vv GSVIVG01007532001

MASDLLSEERSDEVSGLDTSLSAQAYYSRSLPIFQNGSATNWFHYSDEARN  
HKRLKRTQSIASIGSNSSLYSGGKSYSNSSSSFINRSSSTNSLNSLPRLHFRDHI  
WTYTQRYLAAEAVEEAAAAMISAAEGEVEEDGSGDGMRLVQLLIACAEAVA  
CRDKTHASSLSELRANALVFGSSFQRVASCVFVQGLADRLSLVQPLGAVGFIA  
PSINPLDTAWEKKEEALRLVYEICPHIKFGHFVANASILEAFEGENFAHVVDL  
GMTLGLAHGQQWRQLIHSLANRAGRPPRRLRITGVGLCVDRFKIIGEELEAY  
AQDLINLDILQLHCVVKESRGALNSVLQKINELSPKVLVLVEQDSSHNGPFF  
LGRFMEALHYYS AIFDSL EAMPLPKYDTRRAKIEQFYFGEEIKNIVSCEGP  
ARVERHERVDQWRRRMSRAGFQAAPIKMMAQAKQWLKVKACEGYNIMEEKG  
CLVLGWKSKPIVAASCWKC\*

> Vv GSVIVG01010305001

MKLVHQLITCAKVVAFRDKSHASALLSELRANALVFGTSFQRVASCVFVQGLS  
DRLSLIQSLGAVGVGGCTVKTMDITPEKEEAFRLFFEICPQIQFGHLAANASIL  
EAFEGESSVHVVDLGMNLSGSPQGGQWRSLMHSLANRAGKPPSSLQITGVGT  
AAECLKDIIDELEVYAESLGMNFQFSMLHCVVKESRGALNSVLQKIRELSPKA  
VVLVEQDASHNGPFFLGRFMEALHYYS AIFDSL DAMPLPKYDTRRAKMEQFY  
FAEEIKNIISCEGSARVERHQRLDQWRRRMSRAGFQSSPMKMITEAKQWLEK  
VKLCDGYTIVDEKGLVLGWKSKPIIAASCWKCS\*

***Zea mays***

> Zm GRMZM2G013016

MGTSEQPCTSTPNSFTTTSSSYVTSQQIHHL PQHDSVVCTEPGLGFPY YYYVTD  
RQQDAAFDGDDELGFQASKATRVDY YSSPYQLSWPLARAAA AESSRVRKK  
RFWDVLECKQKVEAMEAMESPLVAFQEAEDGGAVVGDGGGGGGGGRGSG  
GGADGMRLVQLLVACAEAVACRDRAQAAALLRELQAGAPVHGTA FQRVAS  
CFVQGLADRLALAHPPALGPASMAFCIPPSCAGRDGGARAEALALAYDLCPY  
LRF AHFVANASILEAFEGETNVHVLDLGMTLGLDRAHQWRALLDGLAARAG  
AAARPARVRVTAVGAPADAMRAVGRELLAYA EGLGMCLEFRAVDRSLES  
LHIDDLGIAADEAVAINSVLELHCVVKESRGALNSVLQTIRKLSPKAFVLVEQD

AGHNGPFFLGRFMEALHYAAVFDALDAALPRYDARRARVEQFHFGAEIRN  
VVGCEGAARVERHERADQWRRRMSRAGFQSMPIRMAARAREWLEENAGG  
GGYTVAAEEKGCLVLGWKGKPVIAASCWKC\*
